# Supplementary material
Source: PubMed Central journal article supplement (PMC5154168)
Supplement: NIHMS834283-supplement-Supporting_Information.pdf [file NIHMS834283-supplement-Supporting_Information.pdf]

# Supporting Information

## Acetophenone Monomers from *Acronychia Trifoliolata*

Katsunori Miyake,<sup>†</sup> Airi Suzuki,<sup>†</sup> Chihiro Morita,<sup>†</sup> Masuo Goto,<sup>‡</sup> David J. Newman,<sup>§</sup> Barry R. O'Keefe,<sup>⊥</sup>  
Susan L. Morris-Natschke,<sup>‡</sup> Kuo-Hsiung Lee,<sup>‡,||</sup> and Kyoko Nakagawa-Goto<sup>†,‡,\*</sup>

<sup>†</sup>School of Pharmaceutical Sciences, College of Medical, Pharmaceutical and Health Sciences, Kanazawa University, Kanazawa, 920-1192, Japan

<sup>‡</sup>Natural Products Research Laboratories, UNC Eshelman School of Pharmacy, University of North Carolina at Chapel Hill, Chapel Hill, NC 27599-7568, United States

<sup>§</sup>NIH Special Volunteer, Wayne, Pennsylvania 19087, United States

<sup>⊥</sup>Natural Products Branch, National Cancer Institute, Frederick Cancer Research and Development Center, Frederick, MD 21702-1201, United States

<sup>||</sup>Chinese Medicine Research and Development Center, China Medical University and Hospital, 2 Yuh-Der Road, Taichung, 40447, Taiwan

## Table of Contents

Figure S1. NCI-60 Human tumor cell line assay data for the crude organic extract of *A. trifoliolata*.

Figure S2.  $^1\text{H}$  NMR spectrum of 1 (600 MHz, in  $\text{CDCl}_3$ )

Figure S3.  $^{13}\text{C}$  NMR spectrum of 1 (150 MHz, in  $\text{CDCl}_3$ ).

Figure S4. H-H COSY experiment of 1 (in  $\text{CDCl}_3$ , 400 MHz).

Figure S5. NOESY experiment of 1 (in  $\text{CDCl}_3$ ).

Figure S6. NOESY experiment of 1 (in  $\text{CDCl}_3$ ).

Figure S7. HMQC experiment of 1 (in  $\text{CDCl}_3$ ).

Figure S8. HMBC experiment of 1 (in  $\text{CDCl}_3$ ).

Figure S9. HMBC experiment of 1 (in  $\text{CDCl}_3$ ).

Figure S10.  $^1\text{H}$  NMR spectrum of 2 (600 MHz, in  $\text{CDCl}_3$ ).

Figure S11. H-H COSY experiment of 2 (in  $\text{CDCl}_3$ ).

Figure S12. NOESY experiment of 2 (in  $\text{CDCl}_3$ ).

Figure S13. NOESY experiment of 2 (in  $\text{CDCl}_3$ ).

Figure S14.  $^1\text{H}$  NMR spectrum of 3 (600 MHz, in  $\text{CDCl}_3$ ).

Figure S15. H-H COSY experiment of 3 (in  $\text{CDCl}_3$ ).

Figure S16. NOESY experiment of 3 (in  $\text{CDCl}_3$ ).

Figure S17. NOESY experiment of 3 (in  $\text{CDCl}_3$ ).

Figure S18.  $^1\text{H}$  NMR spectrum of 4 (600 MHz, in  $\text{CDCl}_3$ ).

Figure S19. H-H COSY experiment of 4 (in  $\text{CDCl}_3$ ).

Figure S20. NOESY experiment of 4 (in  $\text{CDCl}_3$ ).

Figure S21.  $^1\text{H}$  NMR spectrum of 5 (600 MHz, in  $\text{CDCl}_3$ ).

Figure S22.  $^{13}\text{C}$  NMR spectrum of 5 (150 MHz, in  $\text{CDCl}_3$ ).

Figure S23. H-H COSY experiment of 5 (in  $\text{CDCl}_3$ ).

Figure S24. NOESY experiment of 5 (in  $\text{CDCl}_3$ ).

Figure S25. NOESY experiment of 5 (in  $\text{CDCl}_3$ ).

Figure S26. HMQC experiment of 5 (in  $\text{CDCl}_3$ ).

Figure S27. HMBC experiment of 5 (in  $\text{CDCl}_3$ ).

**Figure S28.** HMBC experiment of 5 (in CDCl<sub>3</sub>).

**Figure S29.** <sup>1</sup>H NMR spectrum of 6 (600 MHz, in CDCl<sub>3</sub>).

**Figure S30.** H-H COSY experiment of 6 (in CDCl<sub>3</sub>).

**Figure S31.** NOESY experiment of 6 (in CDCl<sub>3</sub>).

**Figure S32.** <sup>1</sup>H NMR spectrum of 7 (600 MHz, in CDCl<sub>3</sub>).

**Figure S33.** <sup>13</sup>C NMR spectrum of 7 (150 MHz, in CDCl<sub>3</sub>).

**Figure S34.** H-H COSY experiment of 7 (in CDCl<sub>3</sub>).

**Figure S35.** NOESY experiment of 7 (in CDCl<sub>3</sub>).

**Figure S36.** HMQC experiment of 7 (in CDCl<sub>3</sub>).

**Figure S37.** HMBC experiment of 7 (in CDCl<sub>3</sub>).

**Figure S38.** HMBC experiment of 7 (in CDCl<sub>3</sub>).

**Figure S39.** <sup>1</sup>H NMR spectrum of 8 (600 MHz, in acetone-*d*<sub>6</sub>).

**Figure S40.** H-H COSY experiment of 8 (in acetone-*d*<sub>6</sub>).

**Figure S41.** NOESY experiment of 8 (in acetone-*d*<sub>6</sub>).

**Table S42.** <sup>1</sup>H and <sup>13</sup>C NMR data of 7 and 8.

**Figure S43.** HFFABMS data of 1.

**Figure S44.** HFFABMS data of 2.

**Figure S45.** HFFABMS data of 3.

**Figure S46.** HFFABMS data of 4.

**Figure S47.** HFFABMS data of 5.

**Figure S48.** HFFABMS data of 6.

**Figure S49.** HFFABMS data of 7.

**Figure S50.** HFFABMS data of 8.

**Table S51.** Optical Rotations of 1–4, 7 and 8

Figure S1. NCI-60 Human tumor cell line assay data for the crude organic extract of *A. trifoliolata*.

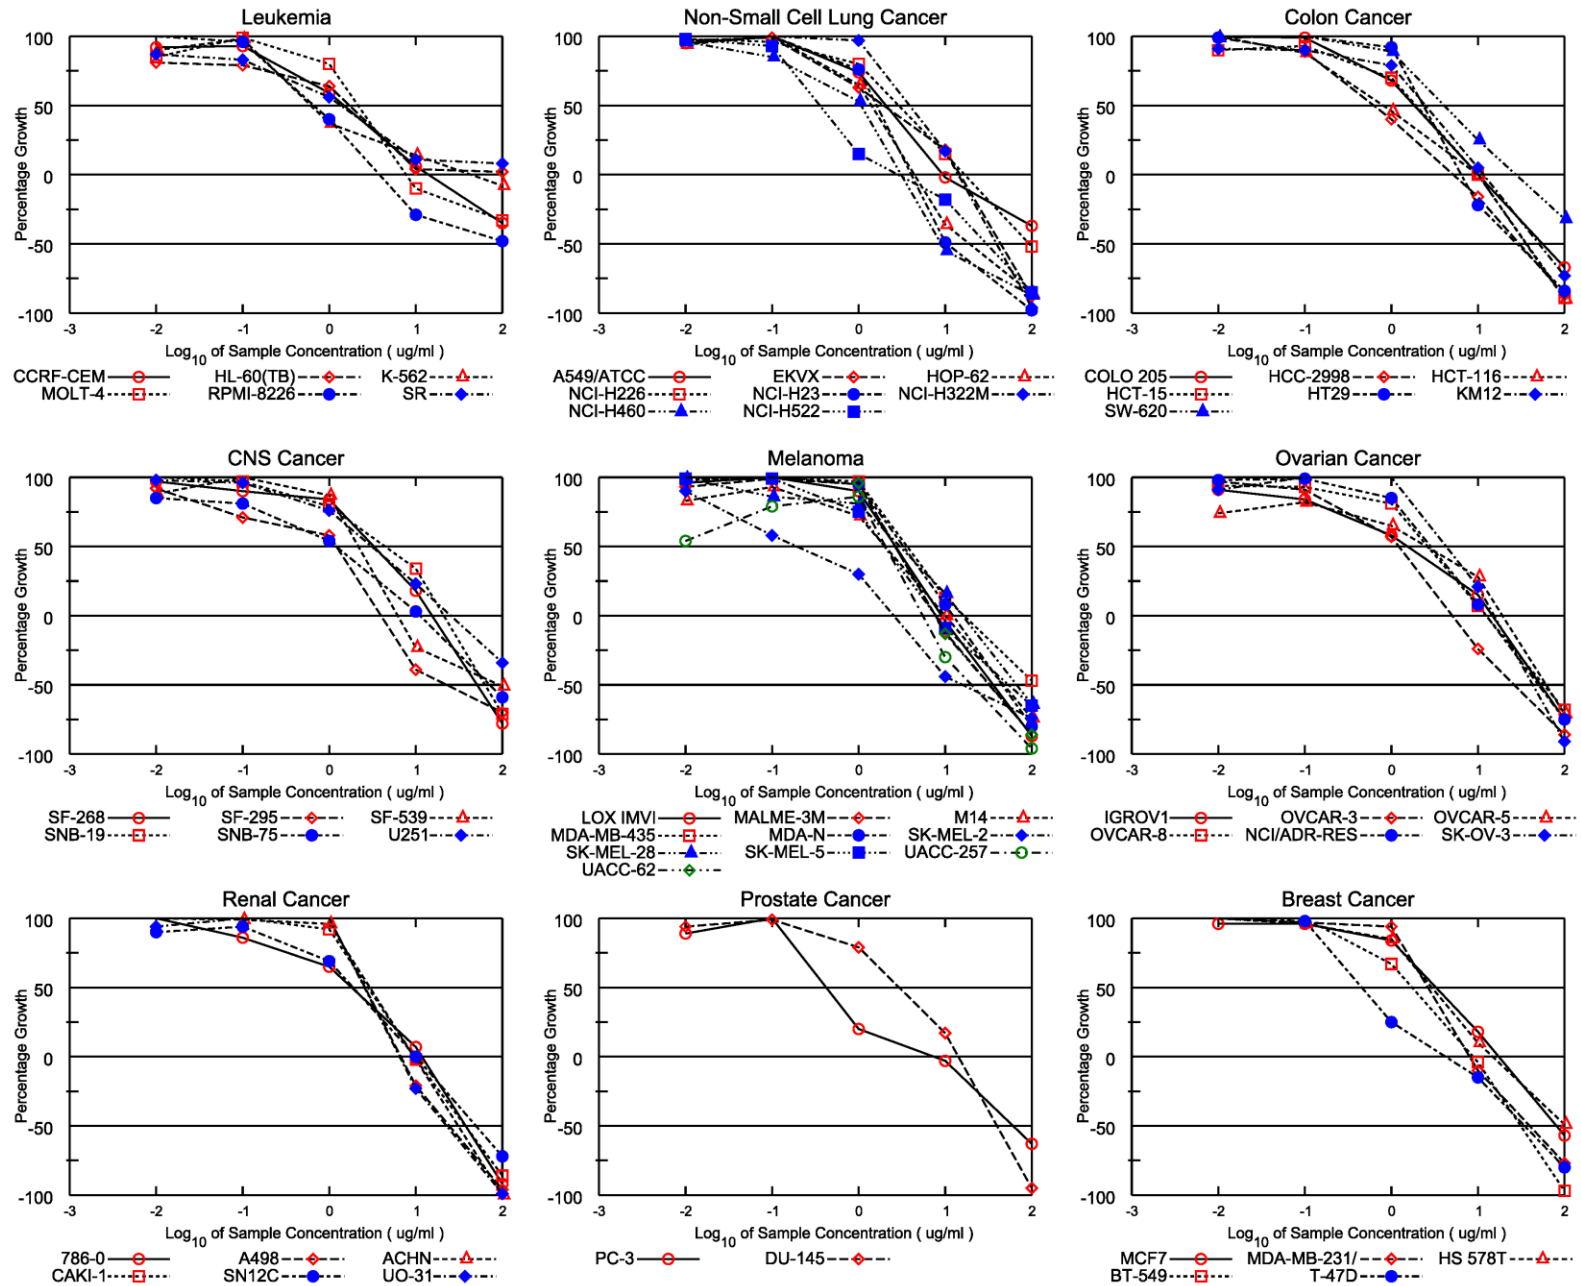

Figure S2.  $^1\text{H}$  NMR spectrum of **1** (600 MHz, in  $\text{CDCl}_3$ ).

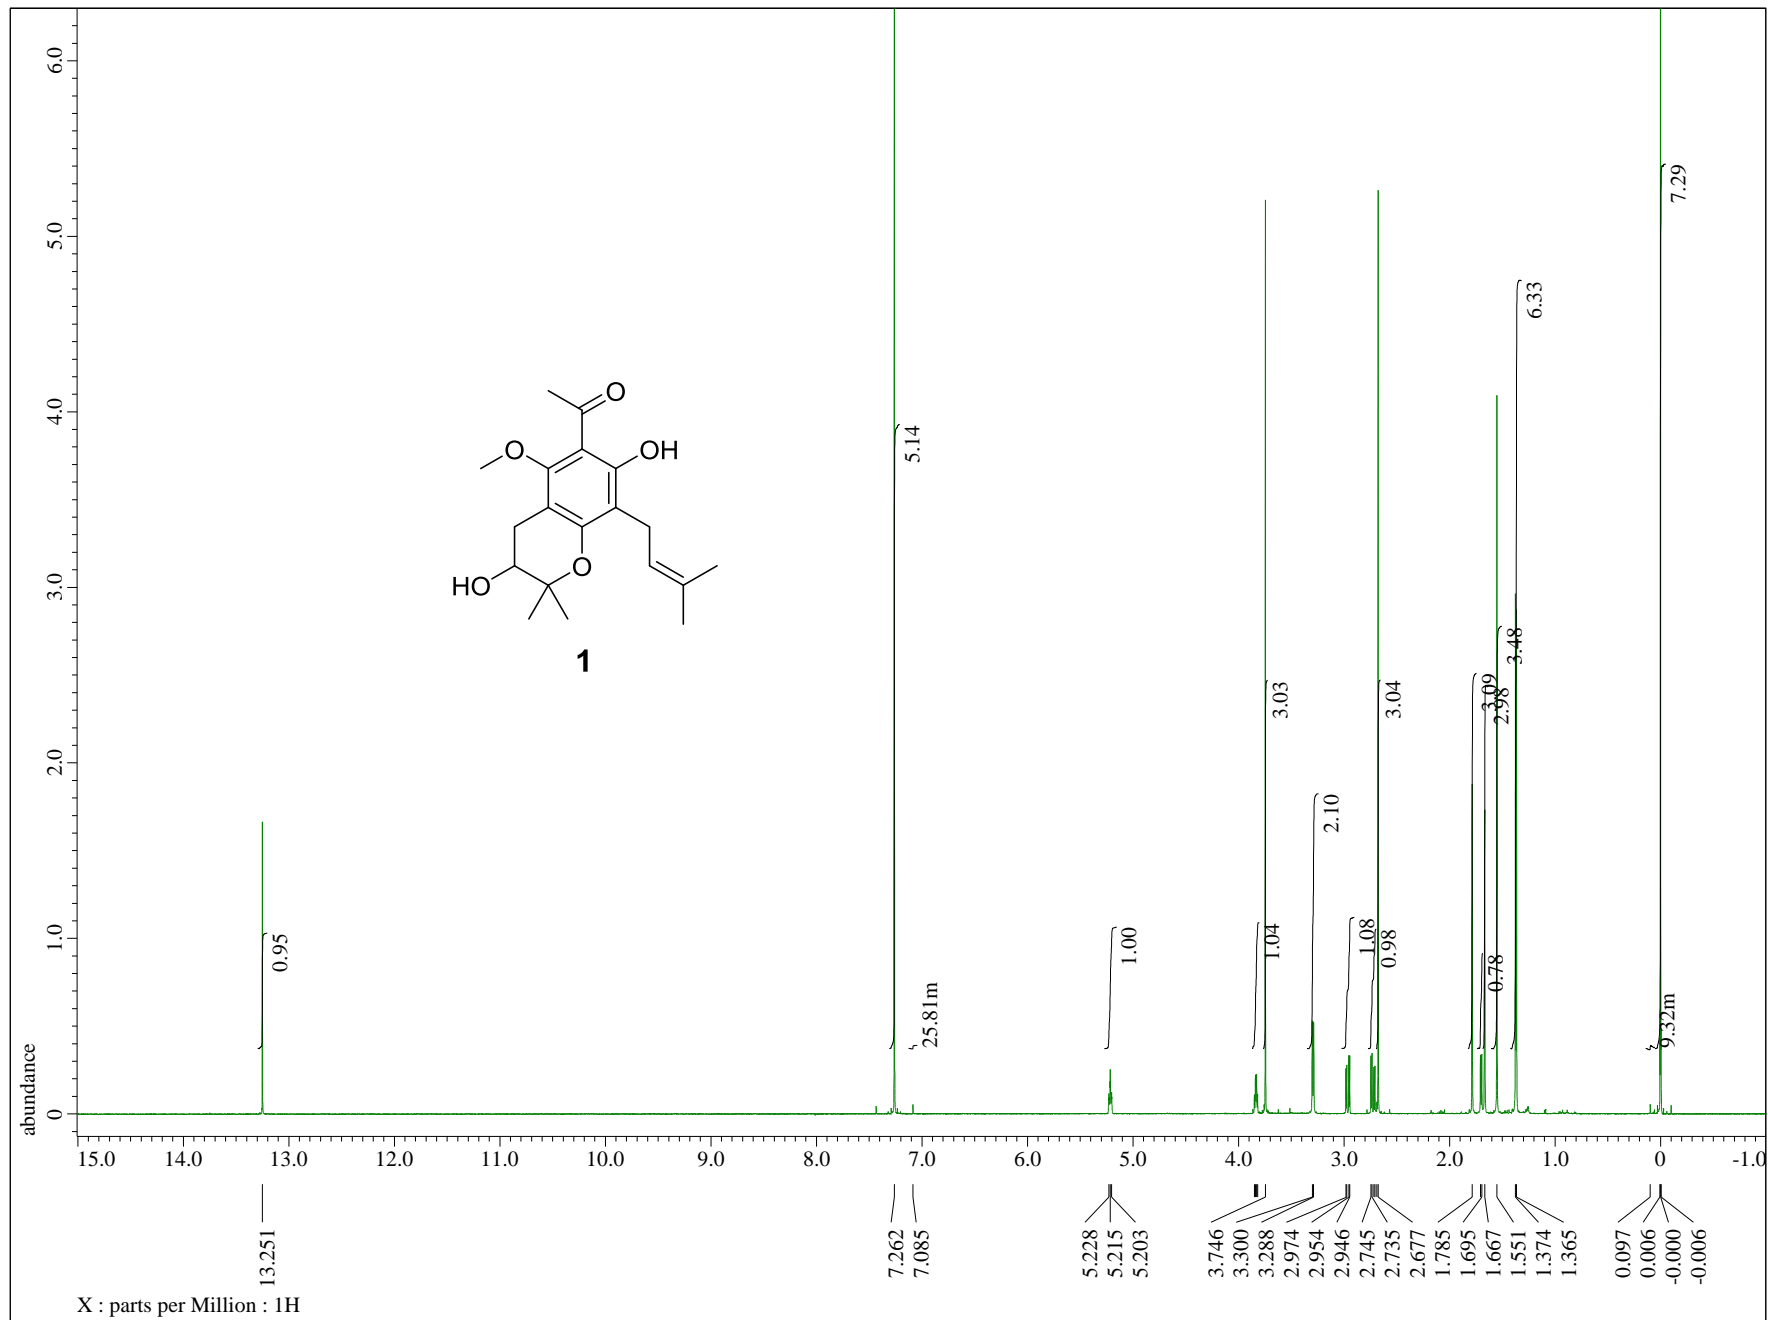

Figure S3.  $^{13}\text{C}$  NMR spectrum of **1** (150 MHz, in  $\text{CDCl}_3$ ).

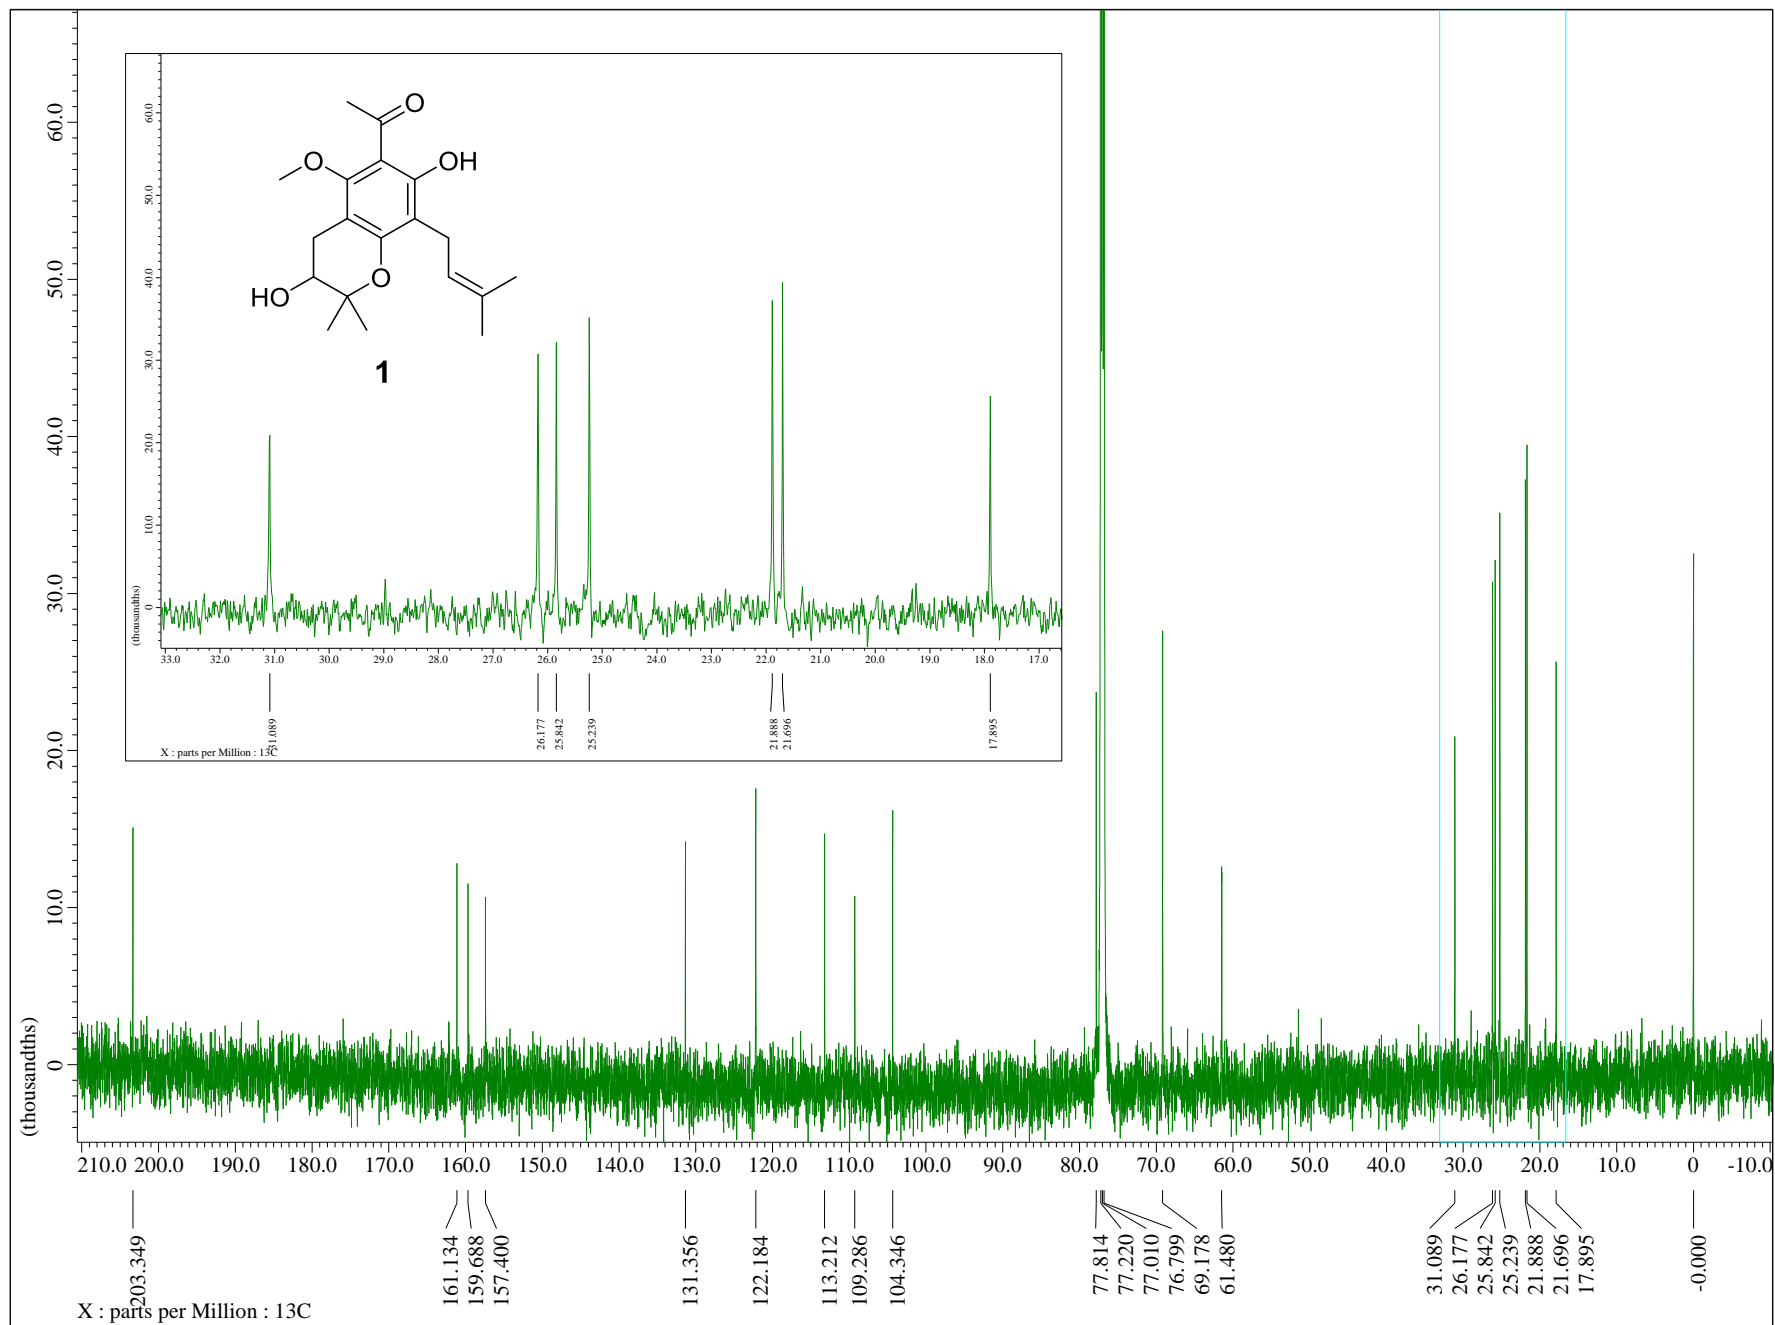

Figure S4. H-H COSY experiment of 1 (in CDCl<sub>3</sub>, 400 MHz).

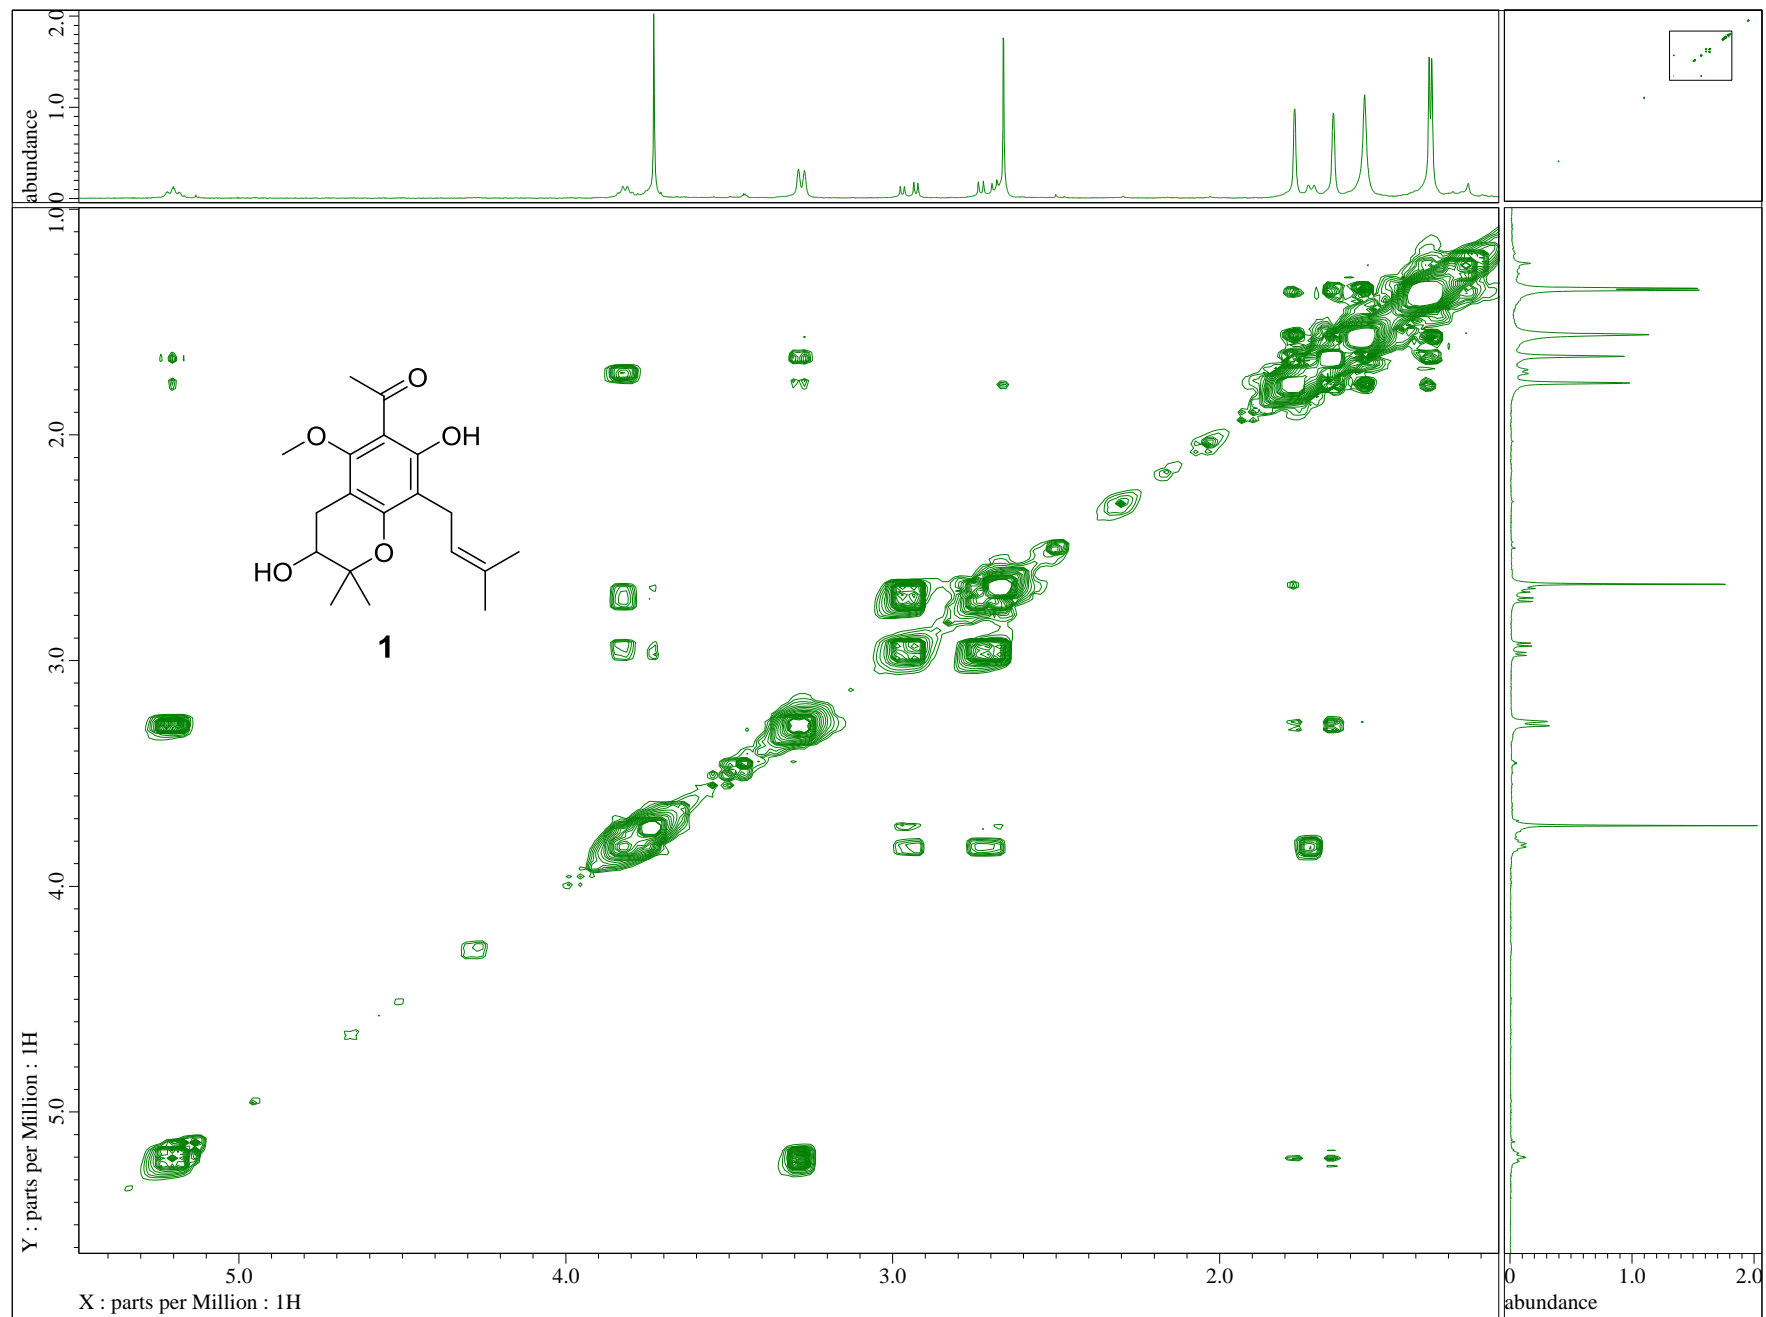

Figure S5. NOESY experiment of **1** (in CDCl<sub>3</sub>).

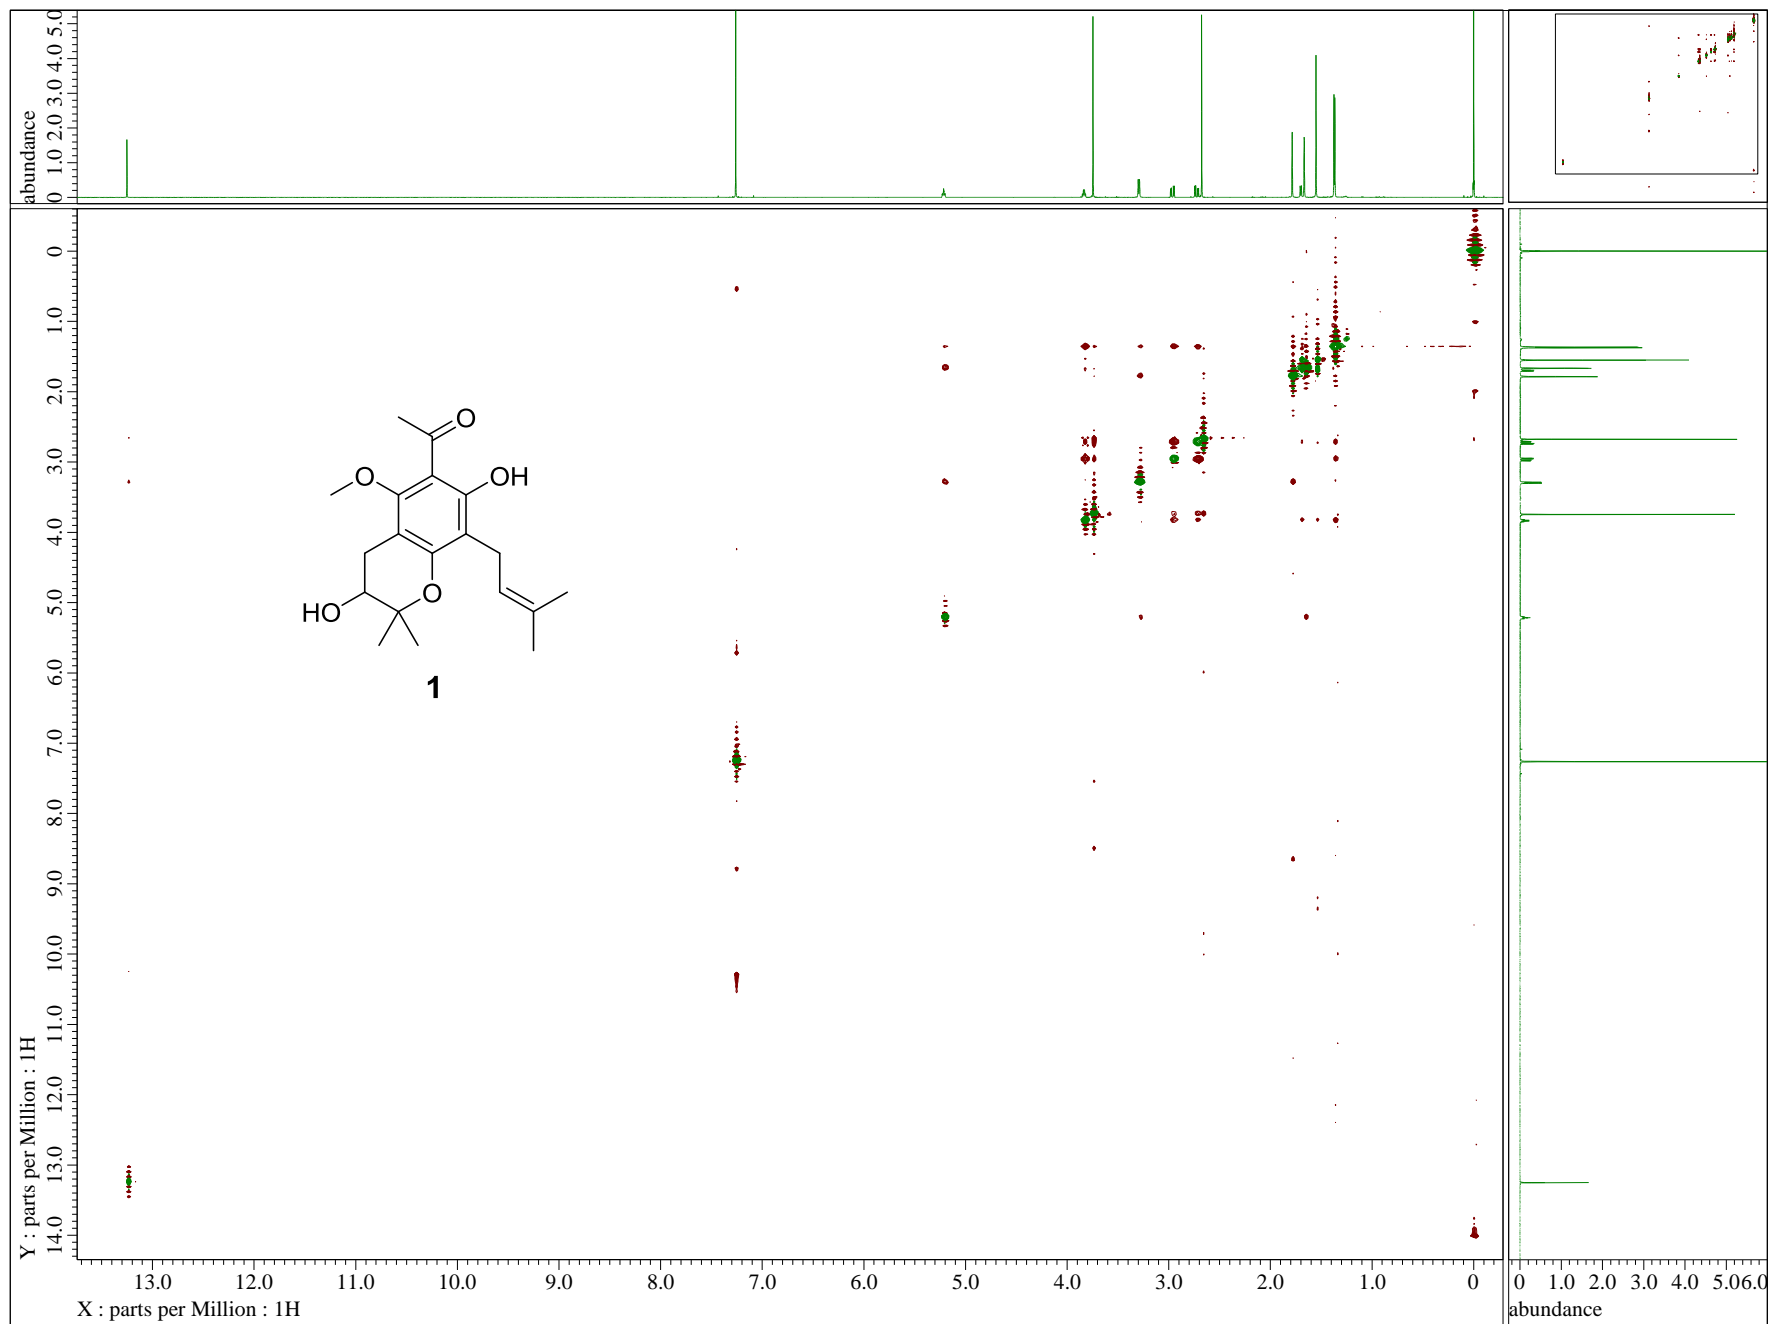



Figure S6. NOESY experiment of 1 (in CDCl<sub>3</sub>).

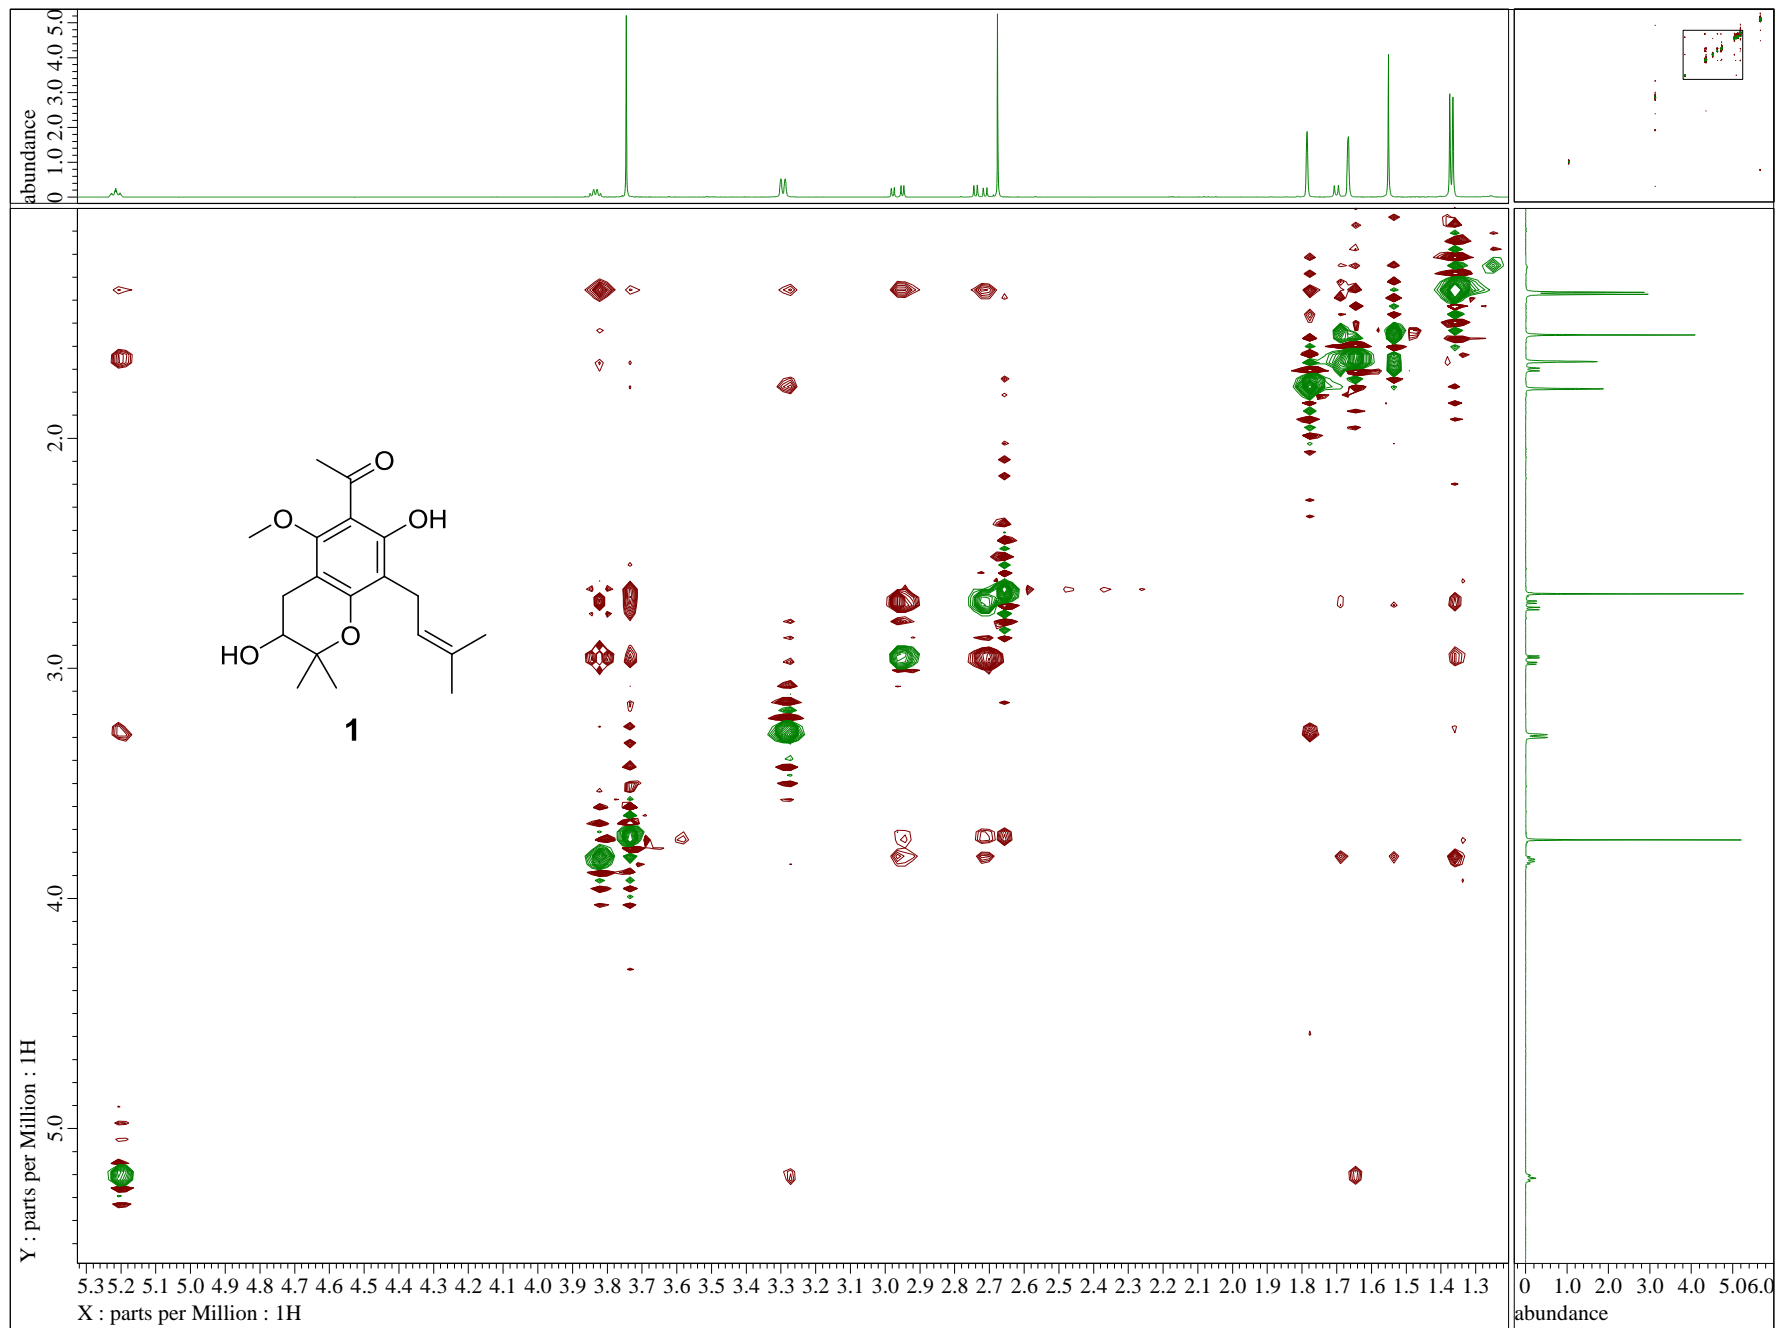

Figure S7. HMQC experiment of 1 (in CDCl<sub>3</sub>).

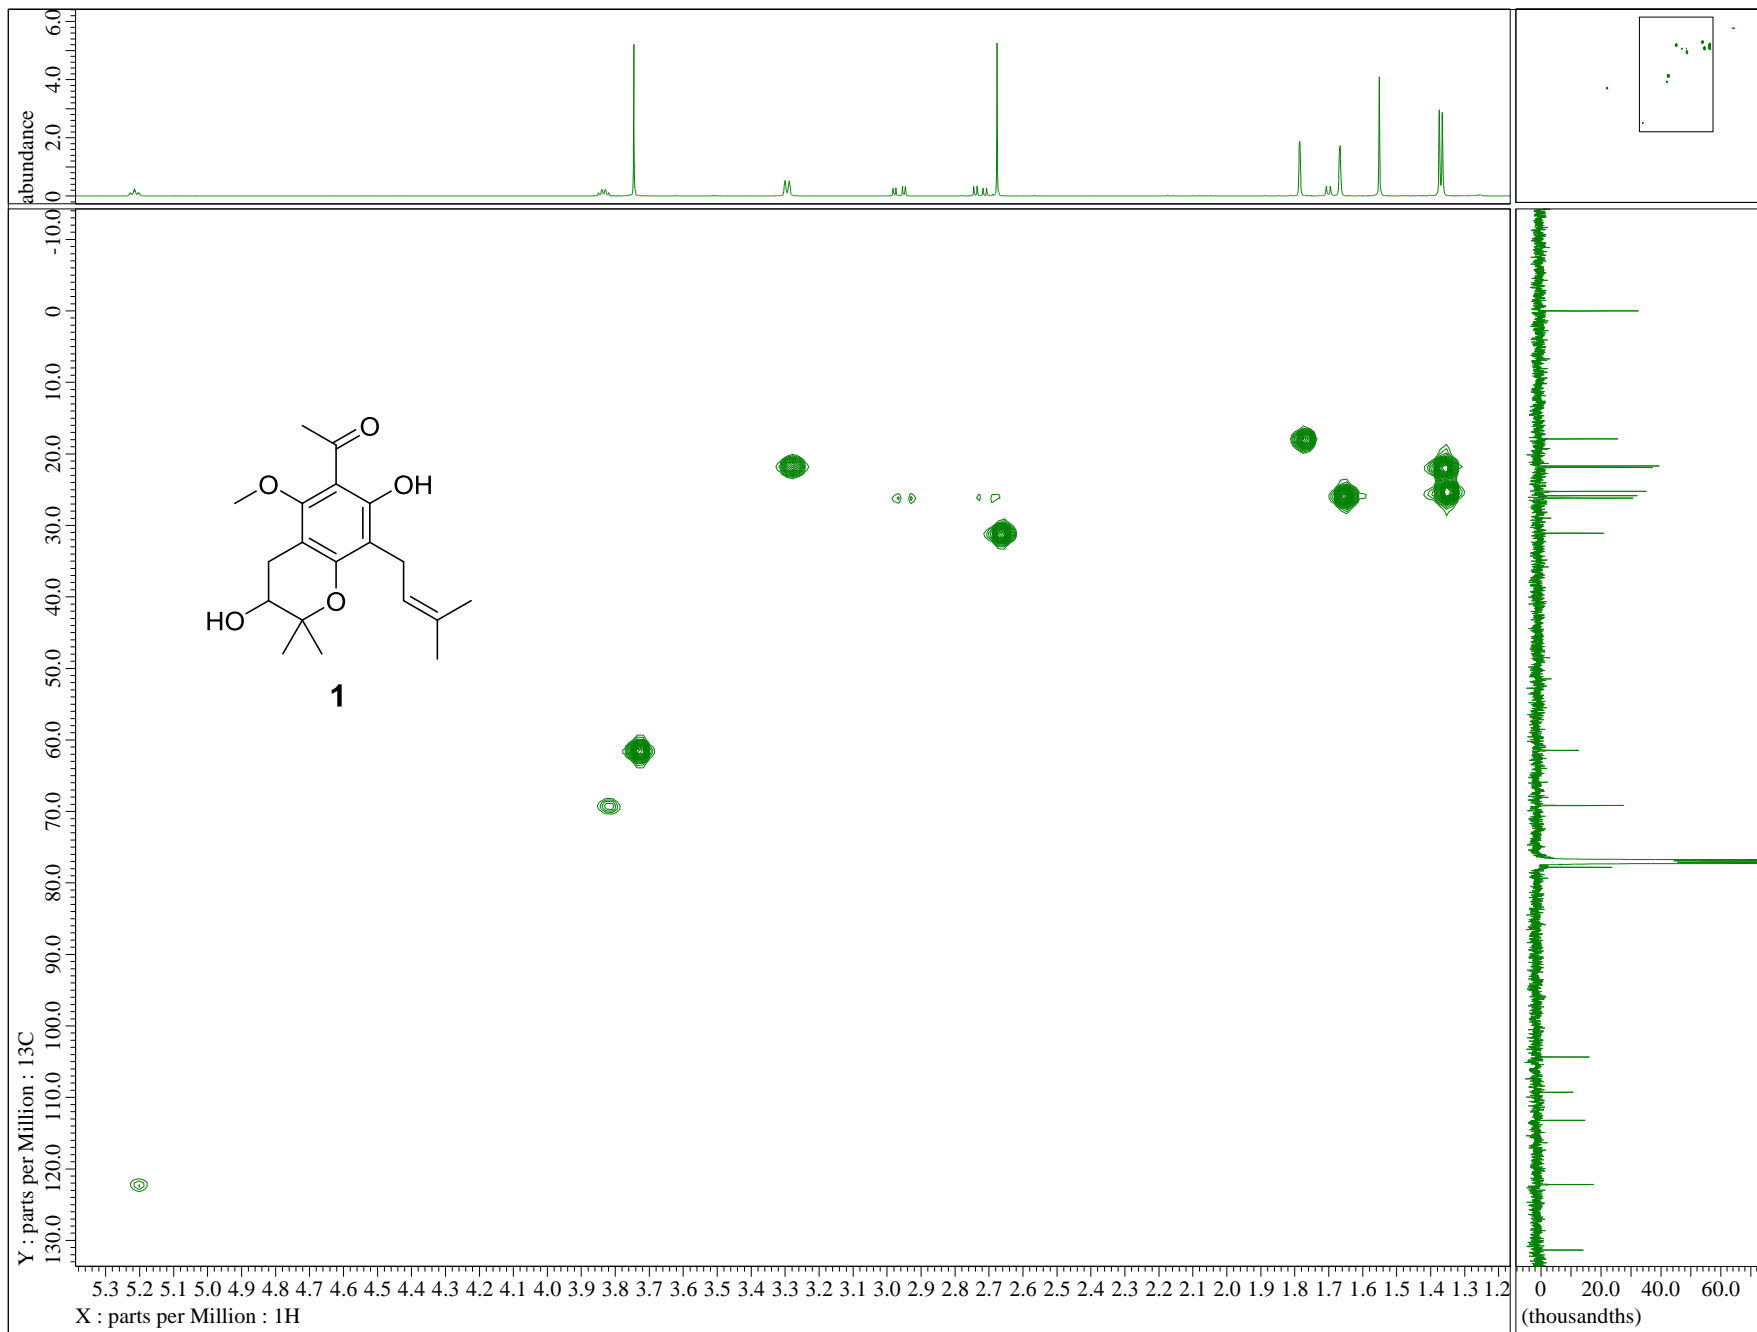

Figure S8. HMBC experiment of 1 (in CDCl<sub>3</sub>).

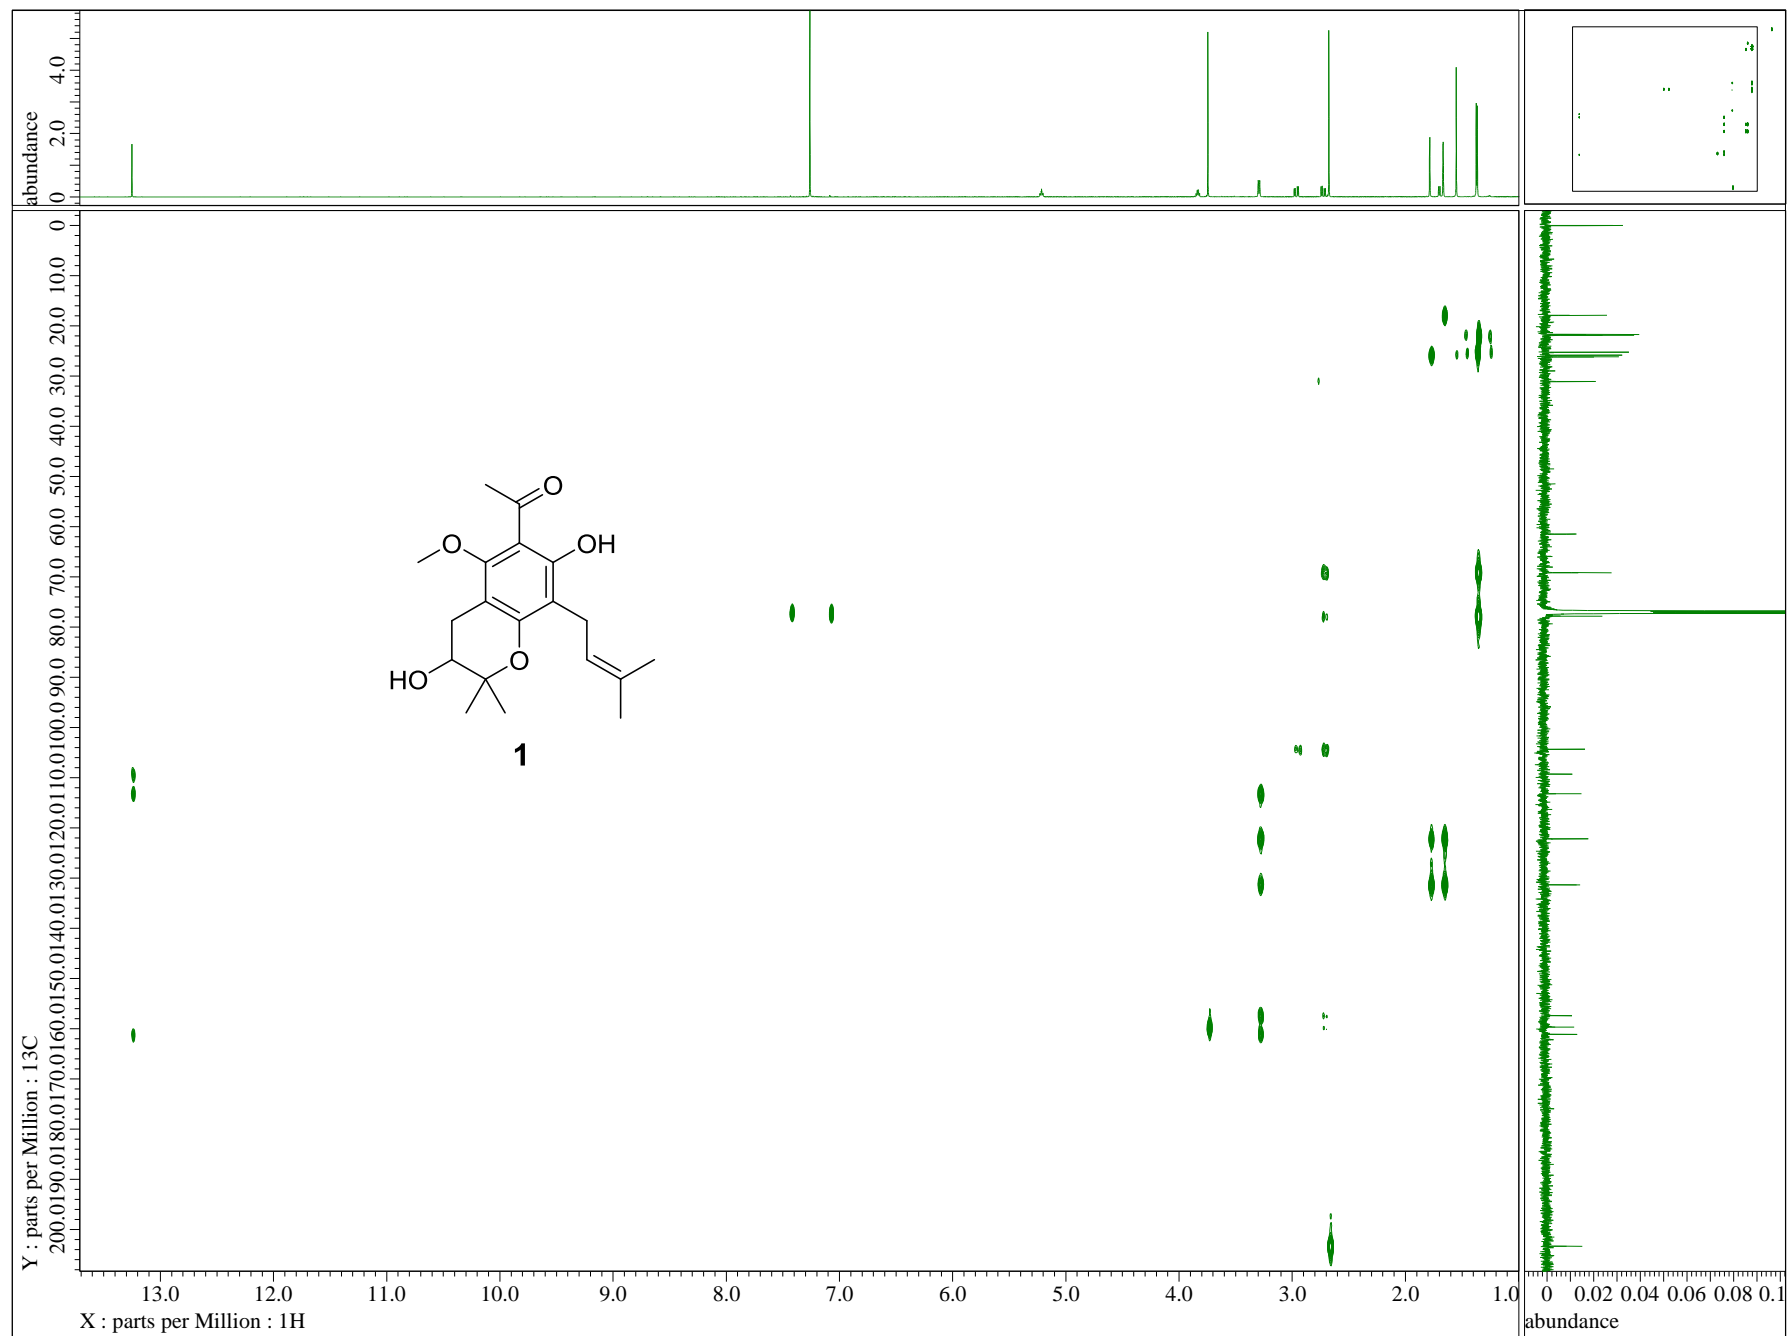

Figure S9. HMBC experiment of 1 (in CDCl<sub>3</sub>).

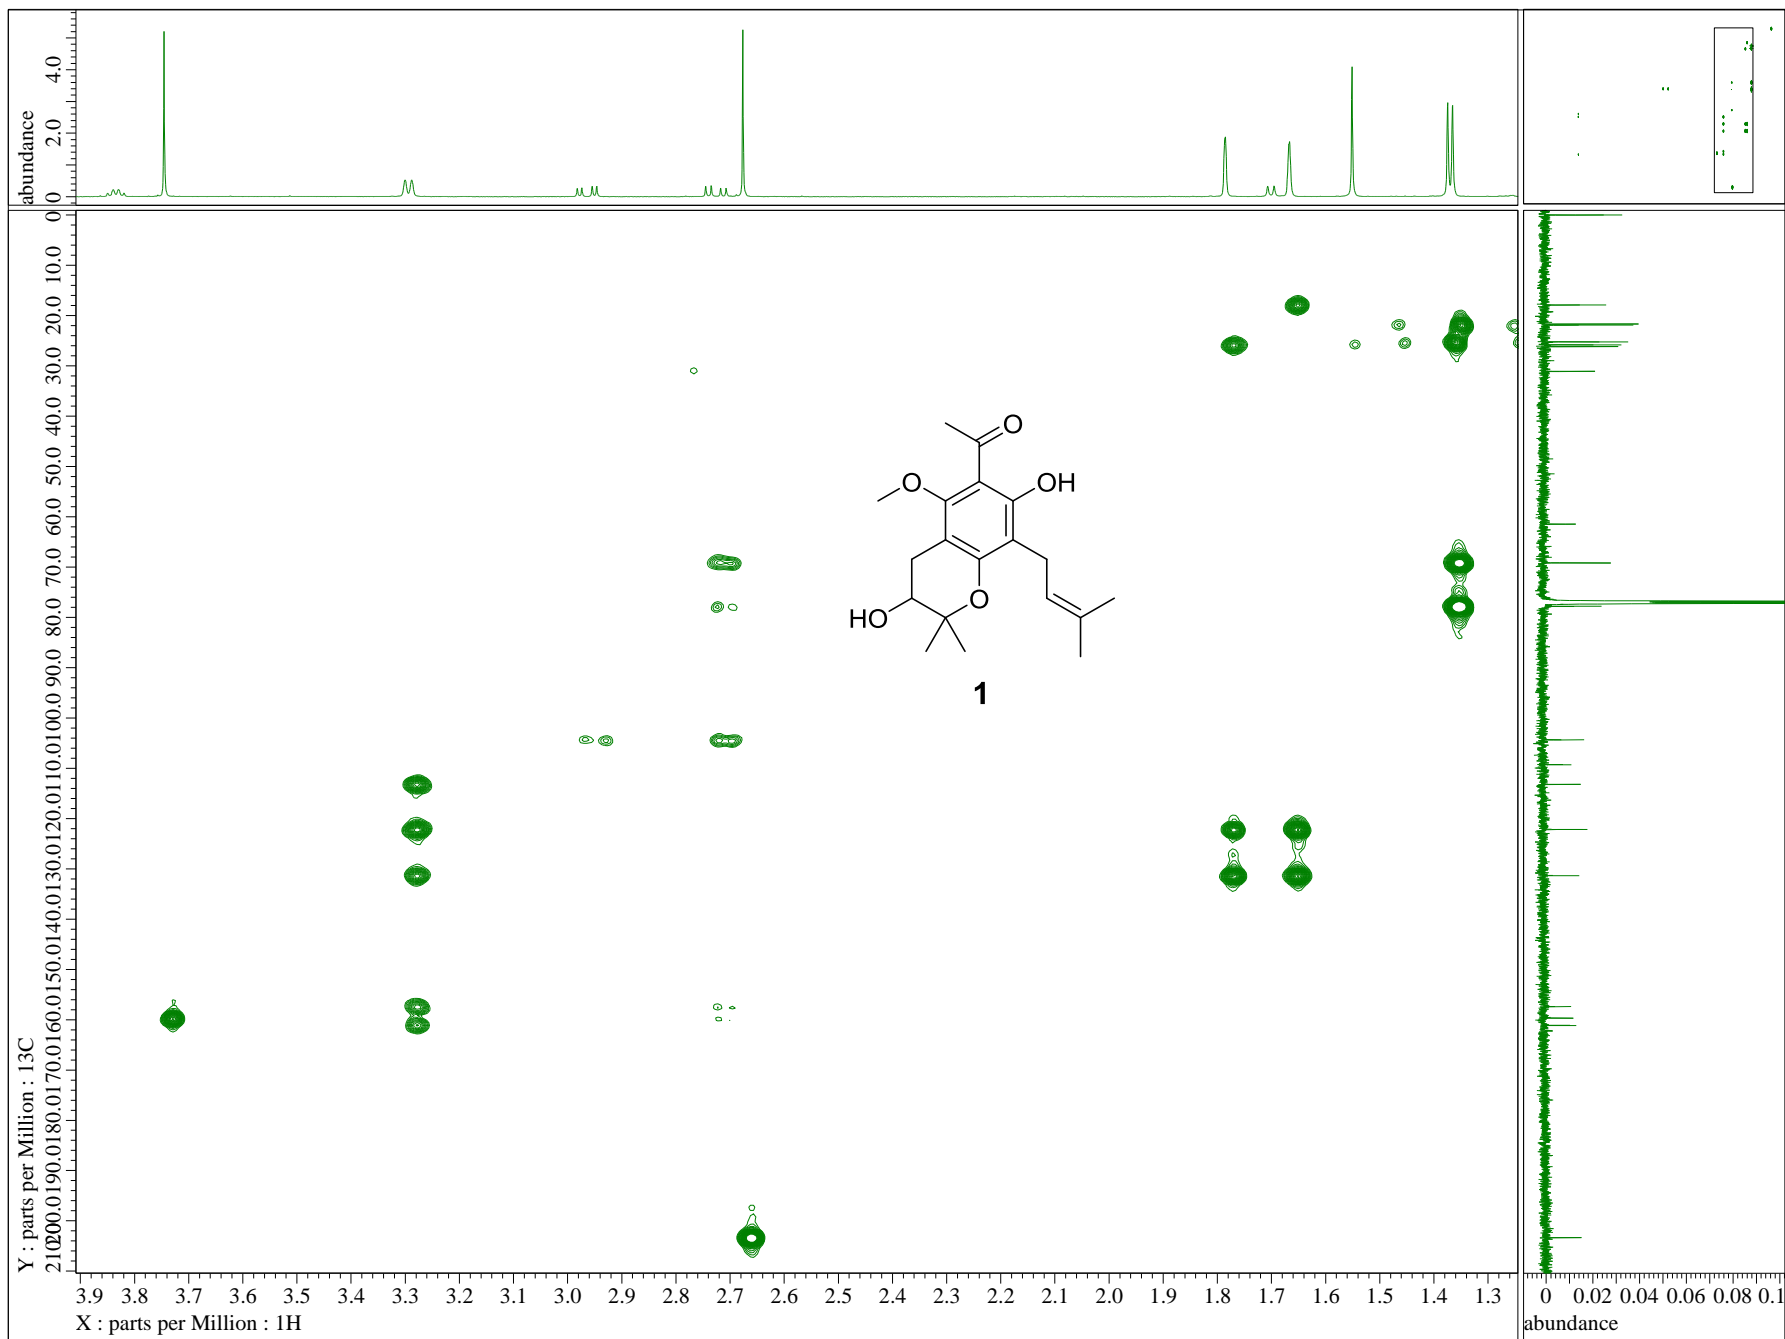

Figure S10. <sup>1</sup>H NMR spectrum of 2 (600 MHz, in CDCl<sub>3</sub>).

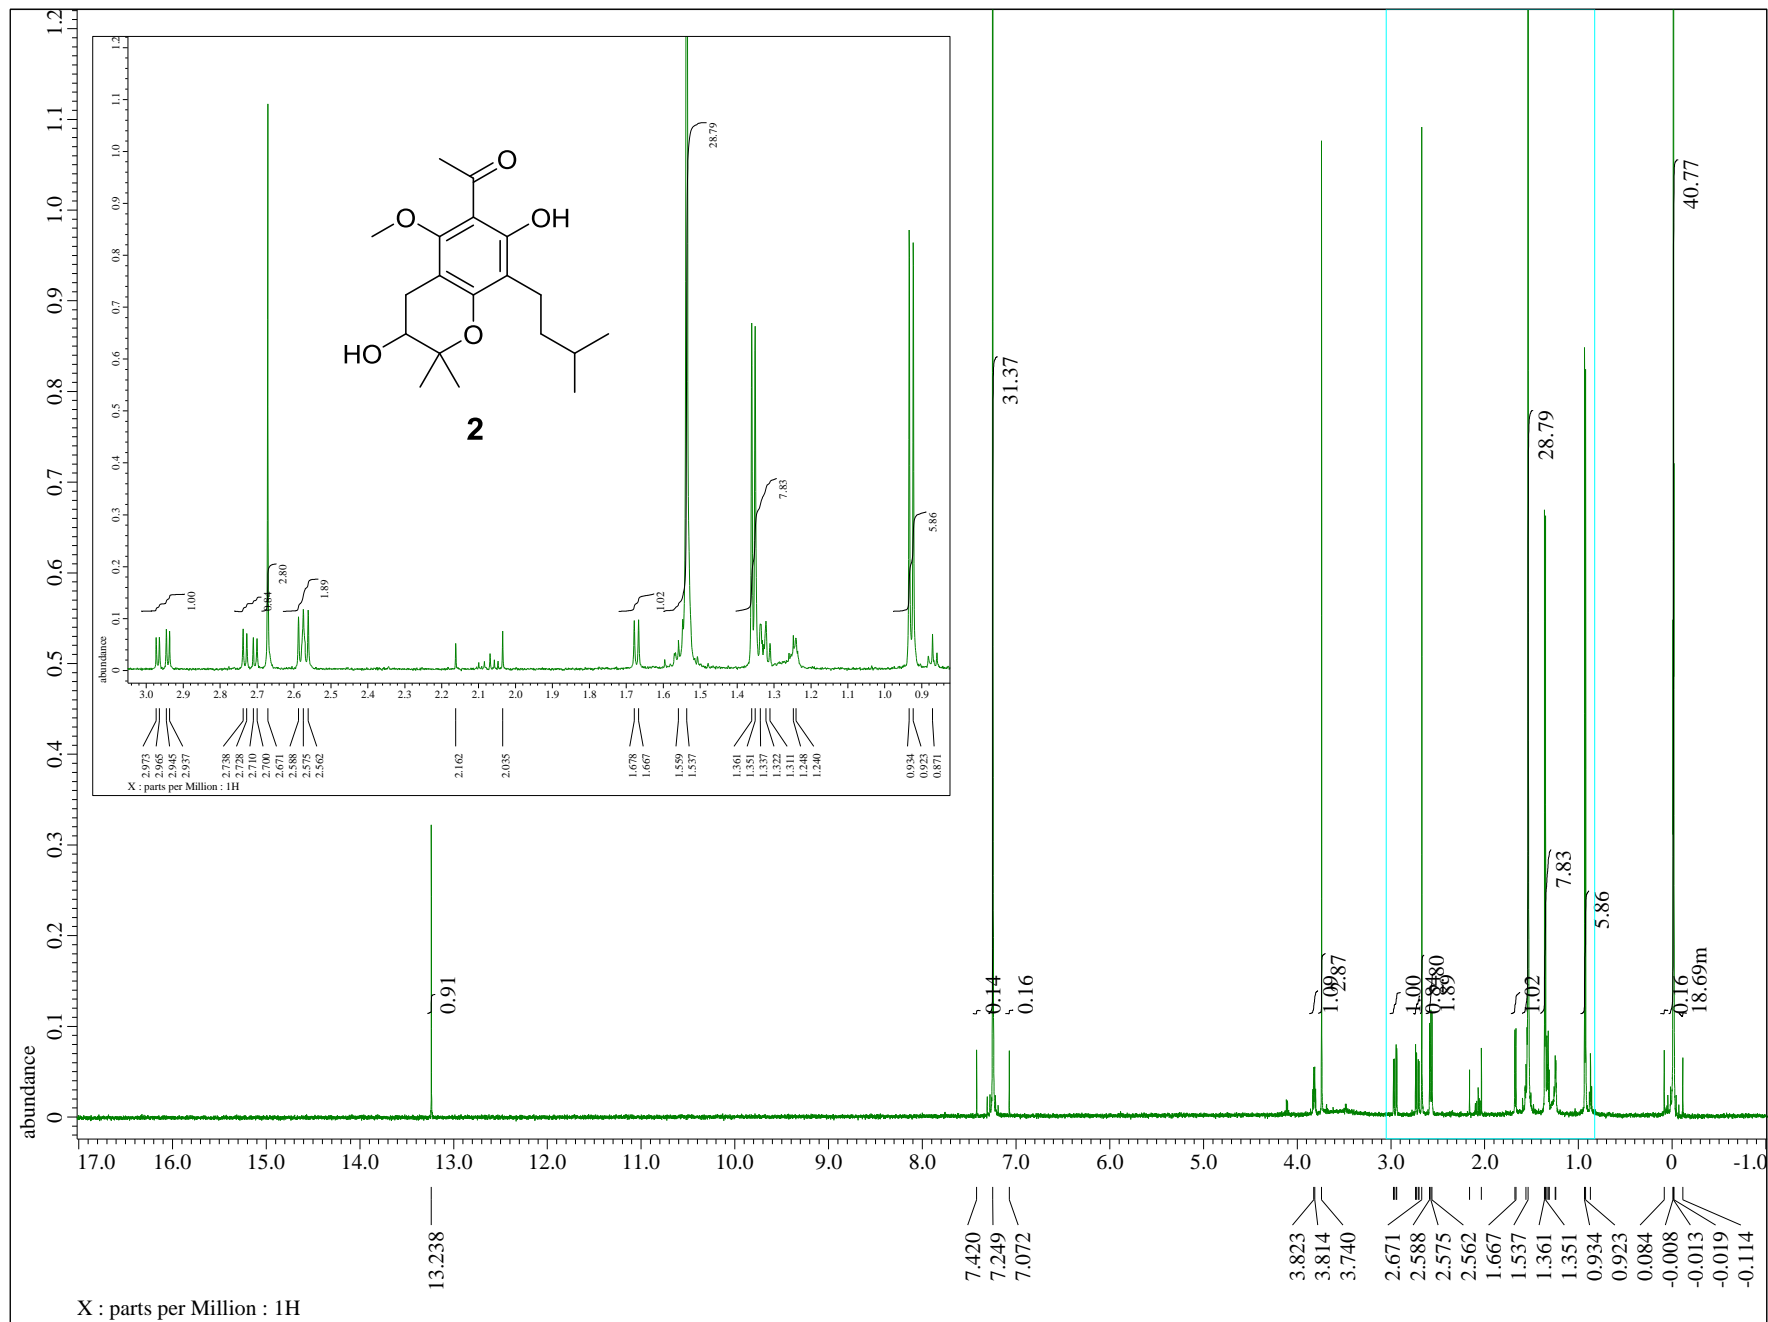

Figure S11. H-H COSY experiment of 2 (in CDCl<sub>3</sub>).

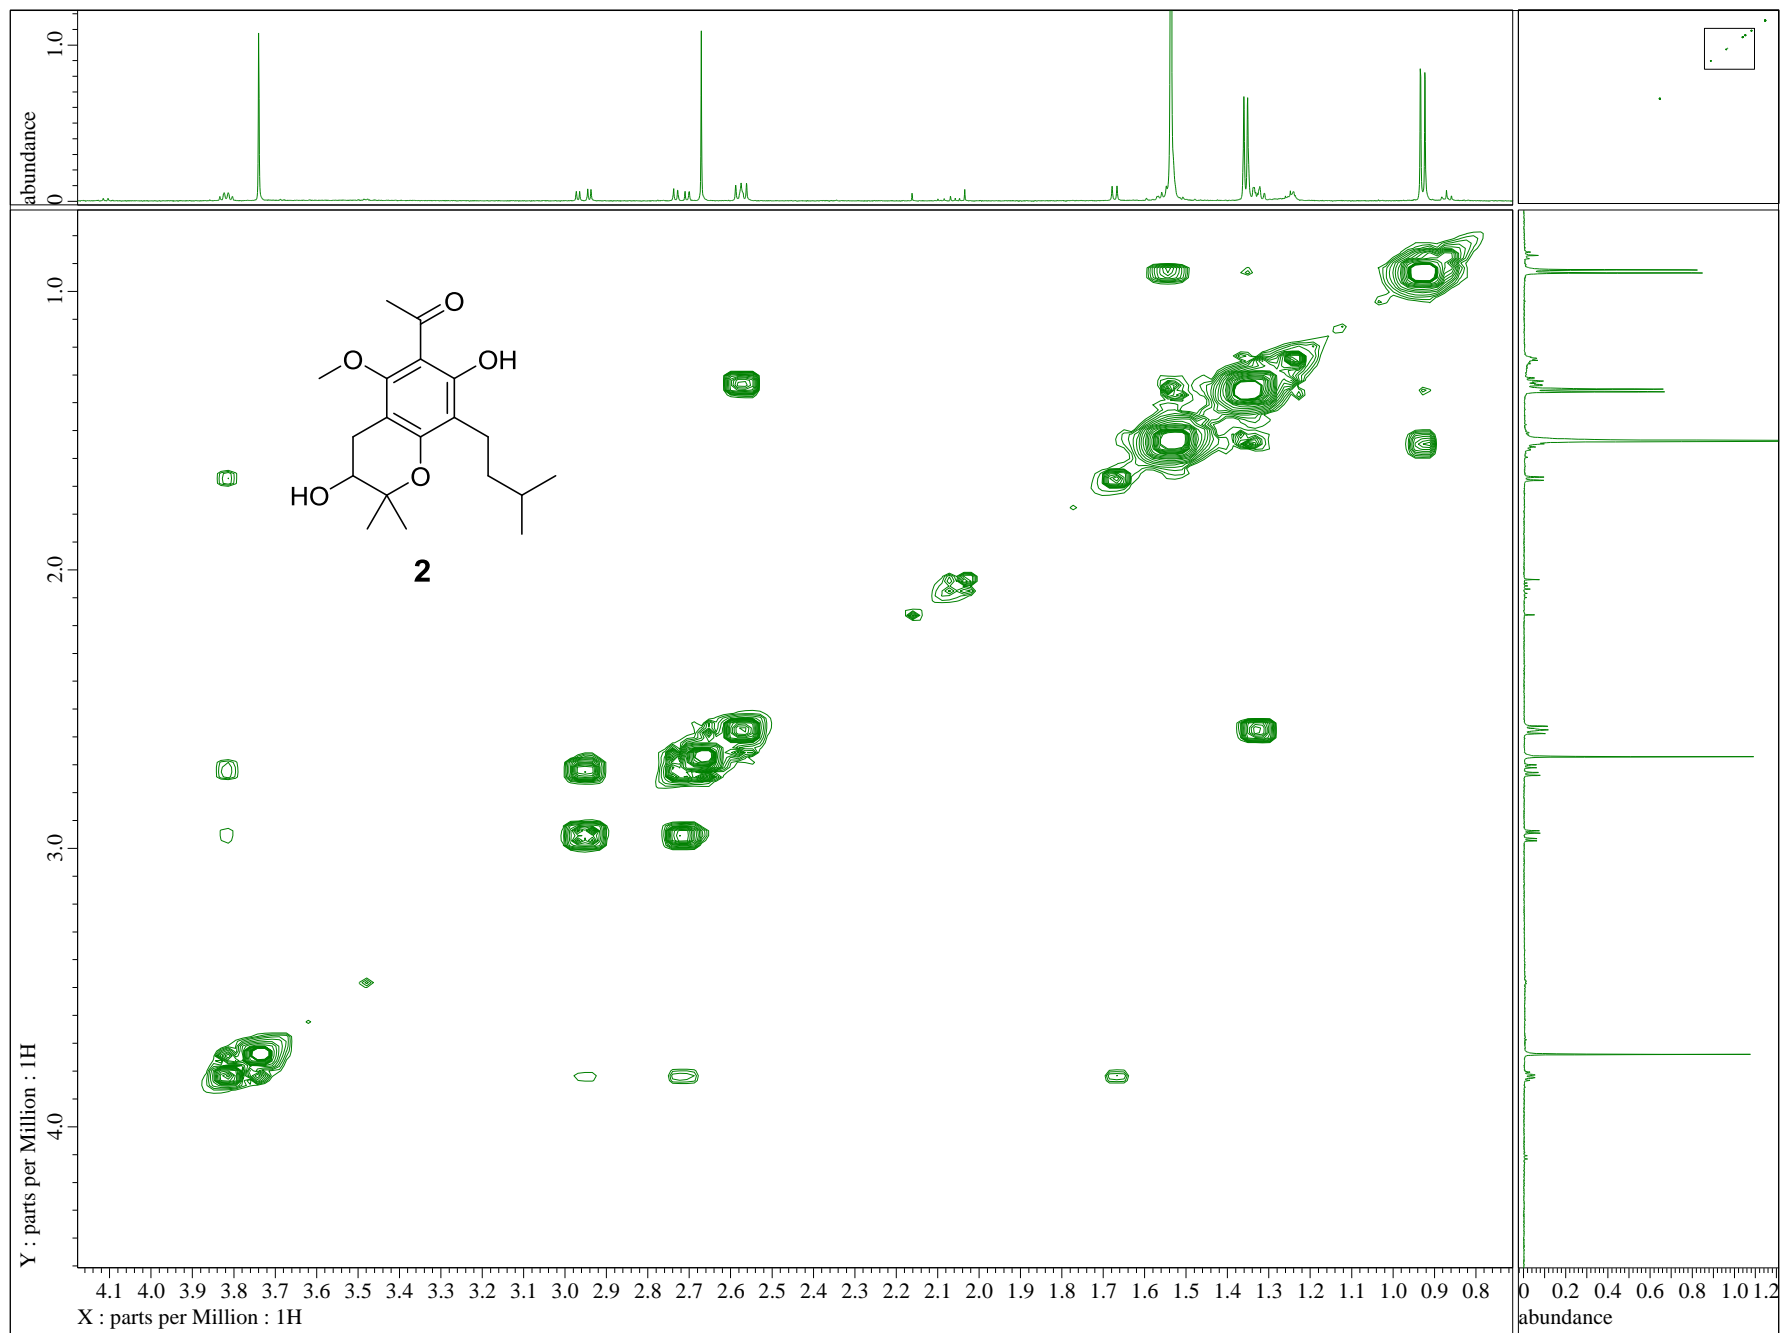

Figure S12. NOESY experiment of **2** (in CDCl<sub>3</sub>).

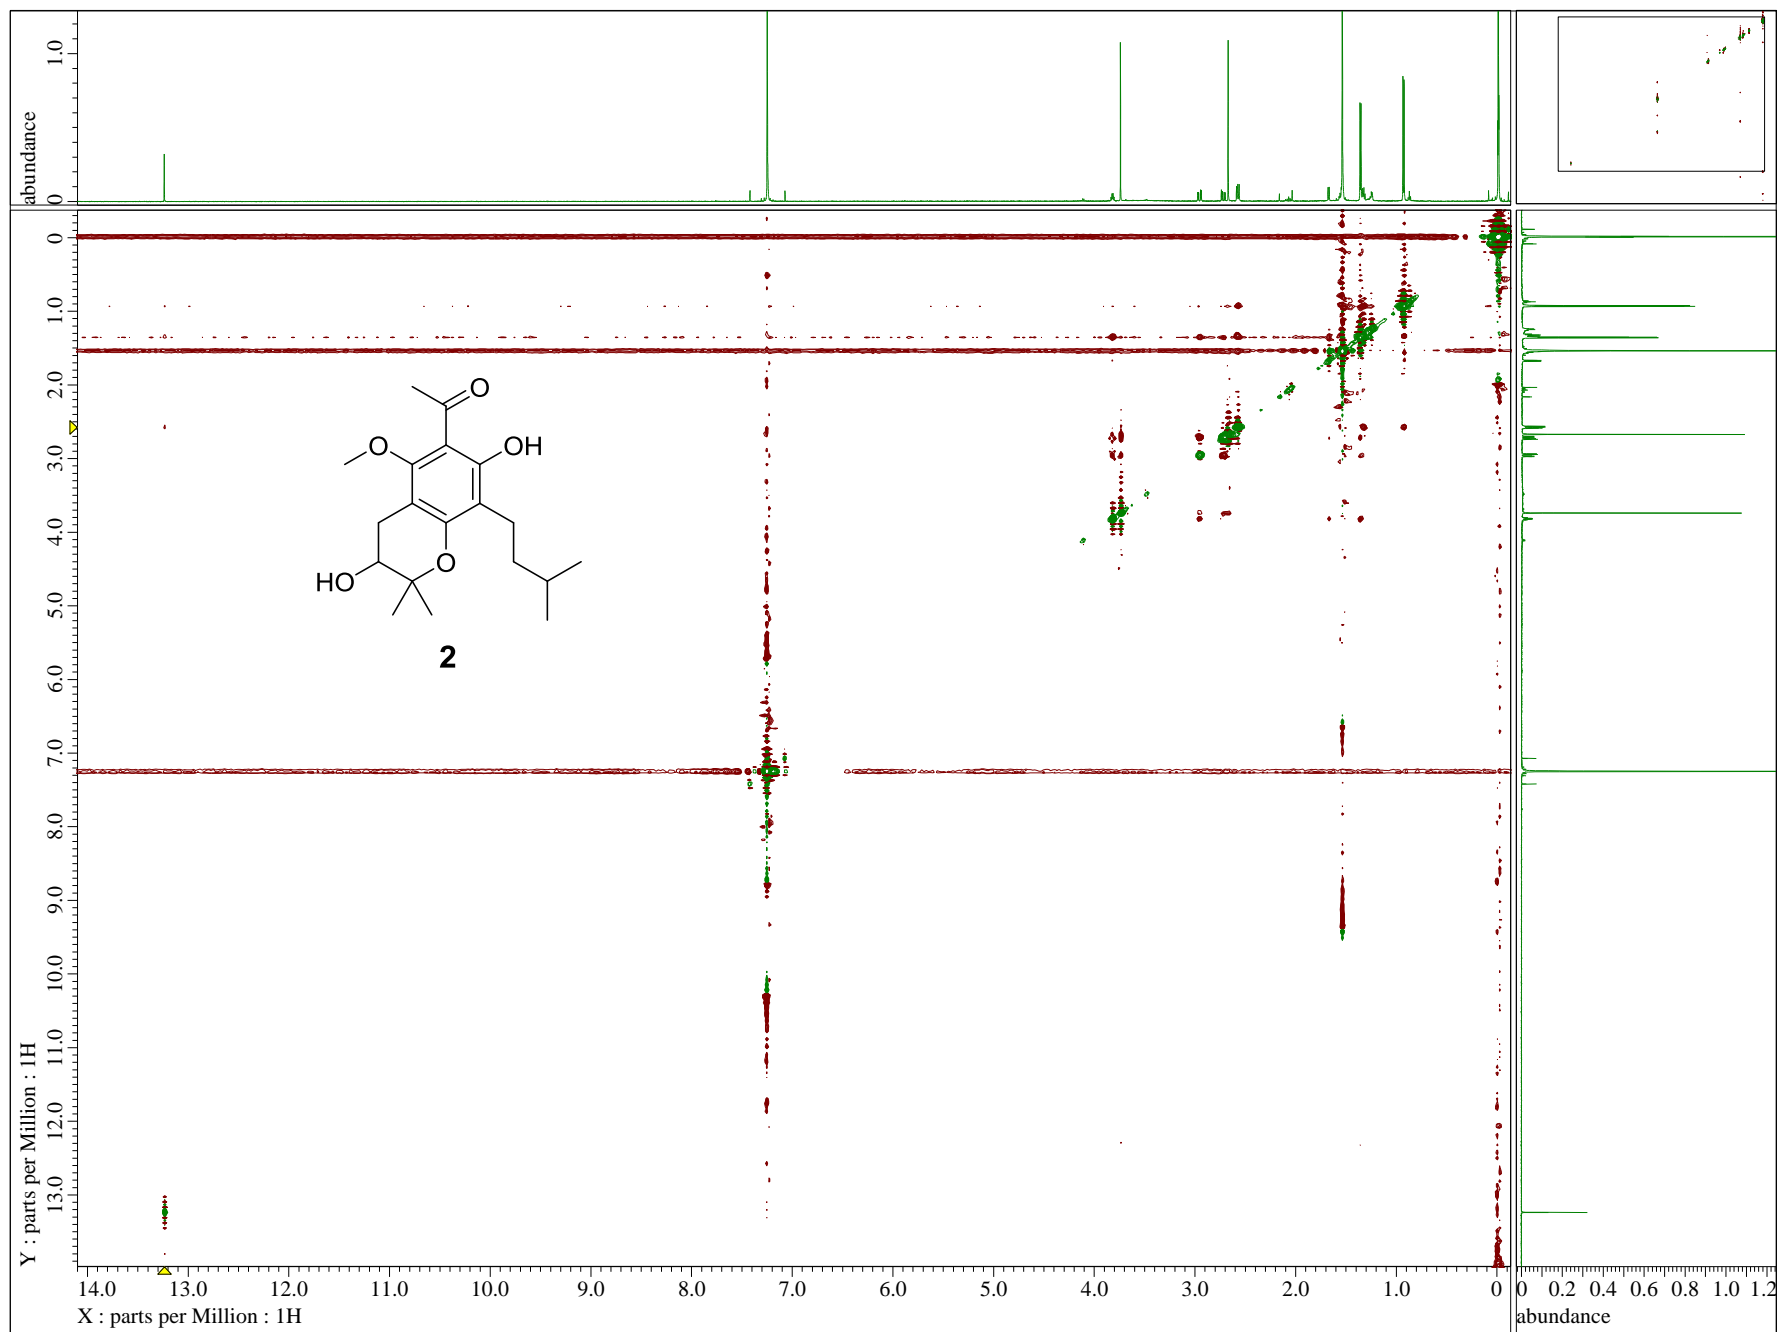

Figure S13. NOESY experiment of **2** (in CDCl<sub>3</sub>).

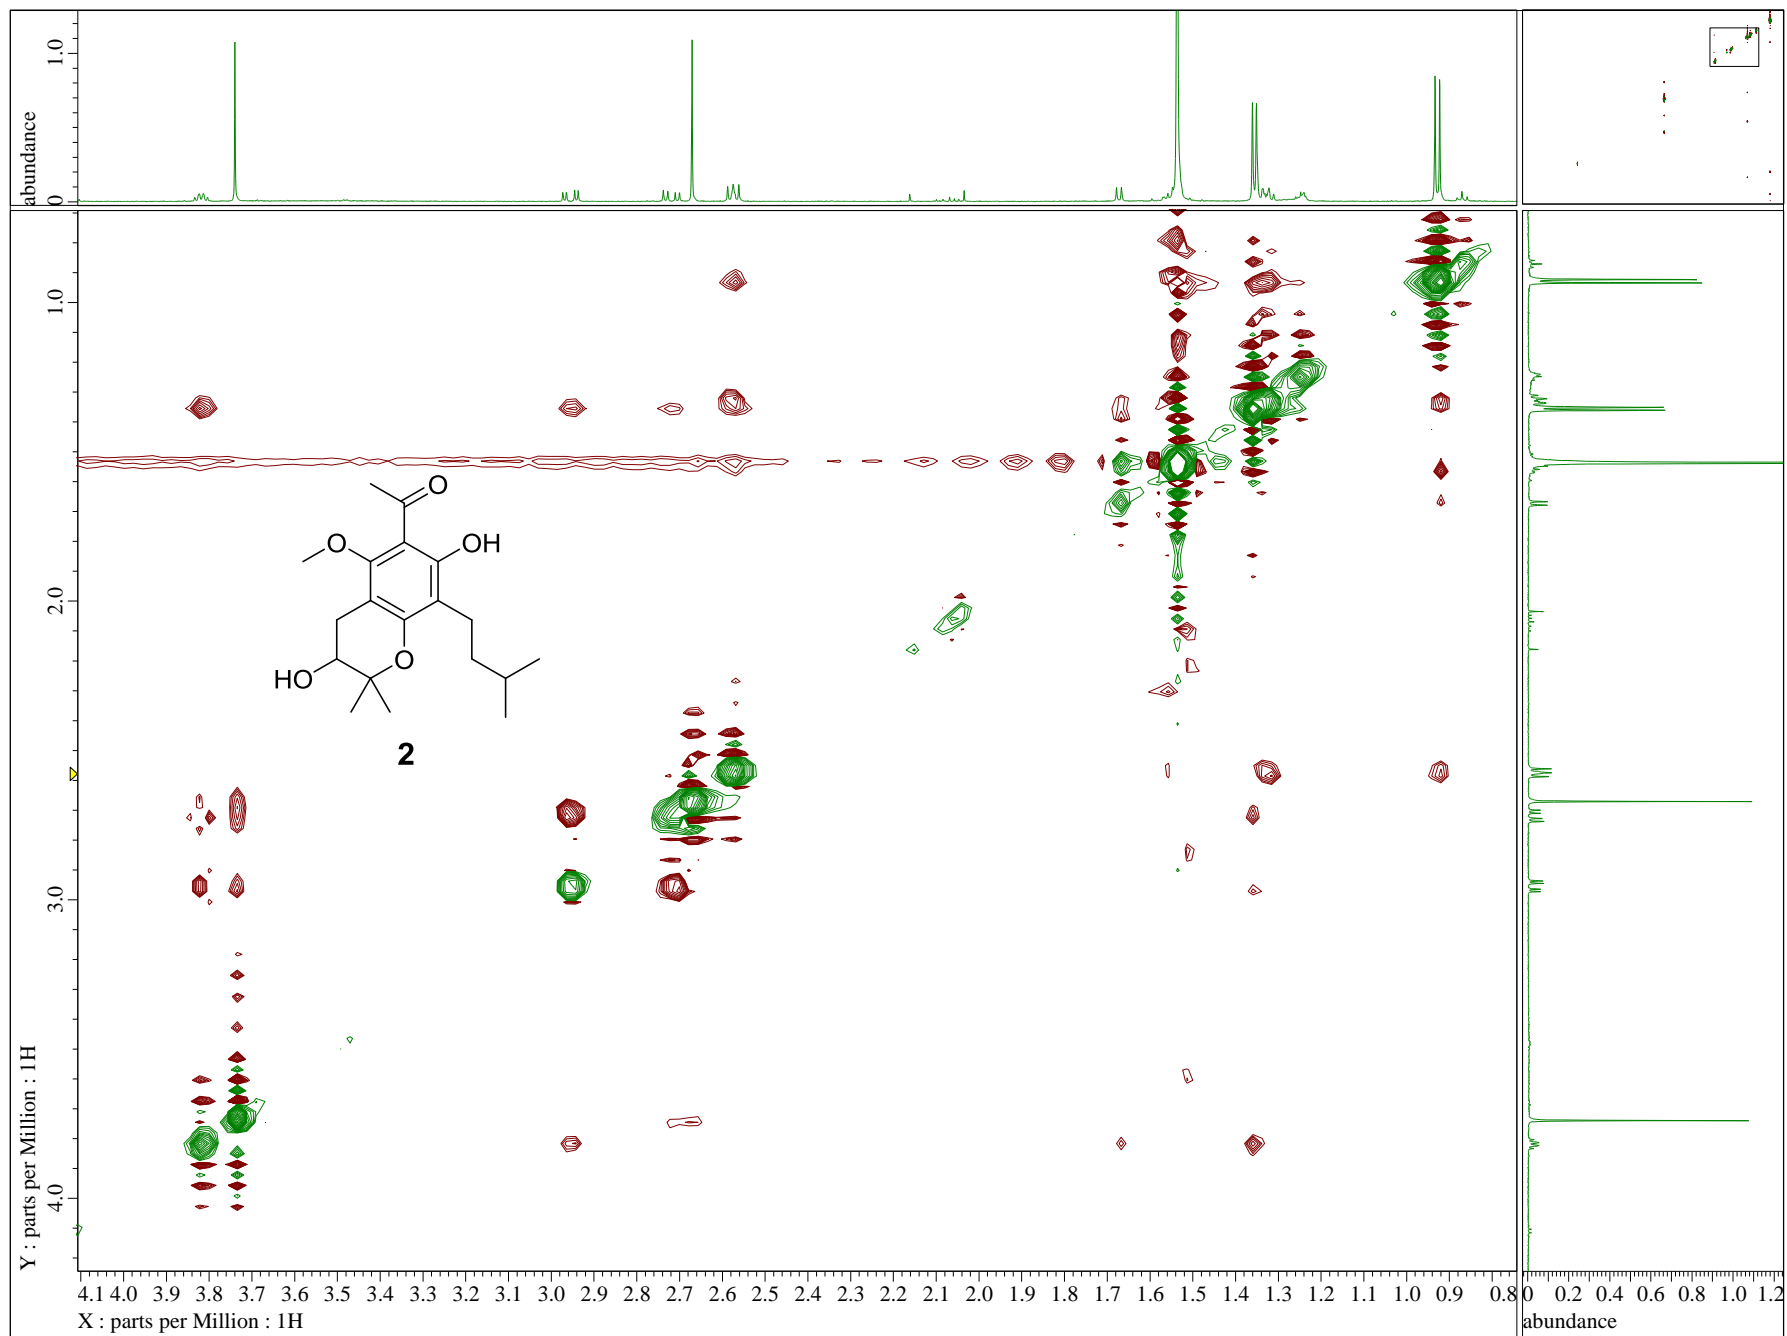



Figure S14. <sup>1</sup>H NMR spectrum of **3** (600 MHz, in CDCl<sub>3</sub>).

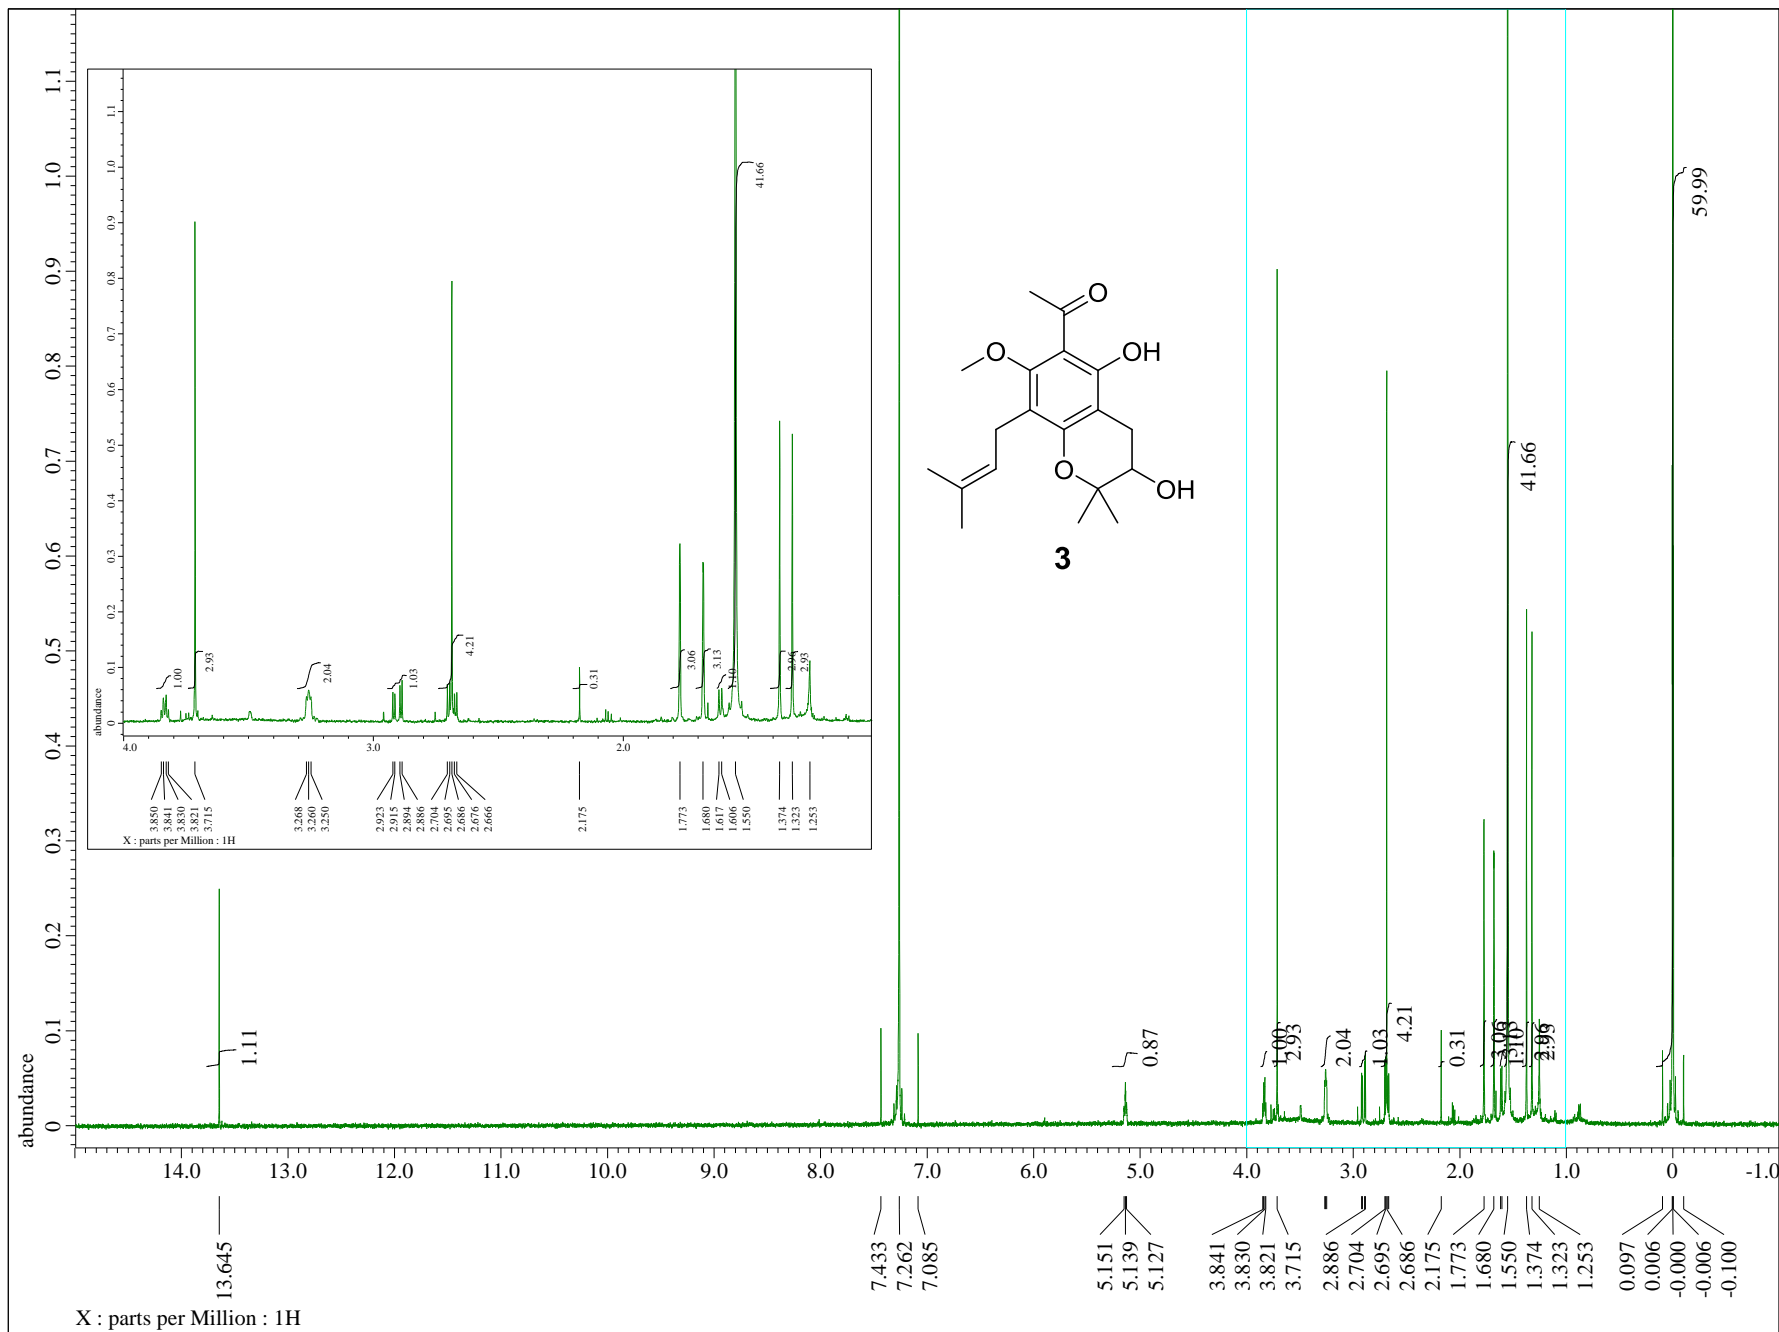

Figure S15. H-H COSY experiment of **3** (in CDCl<sub>3</sub>).

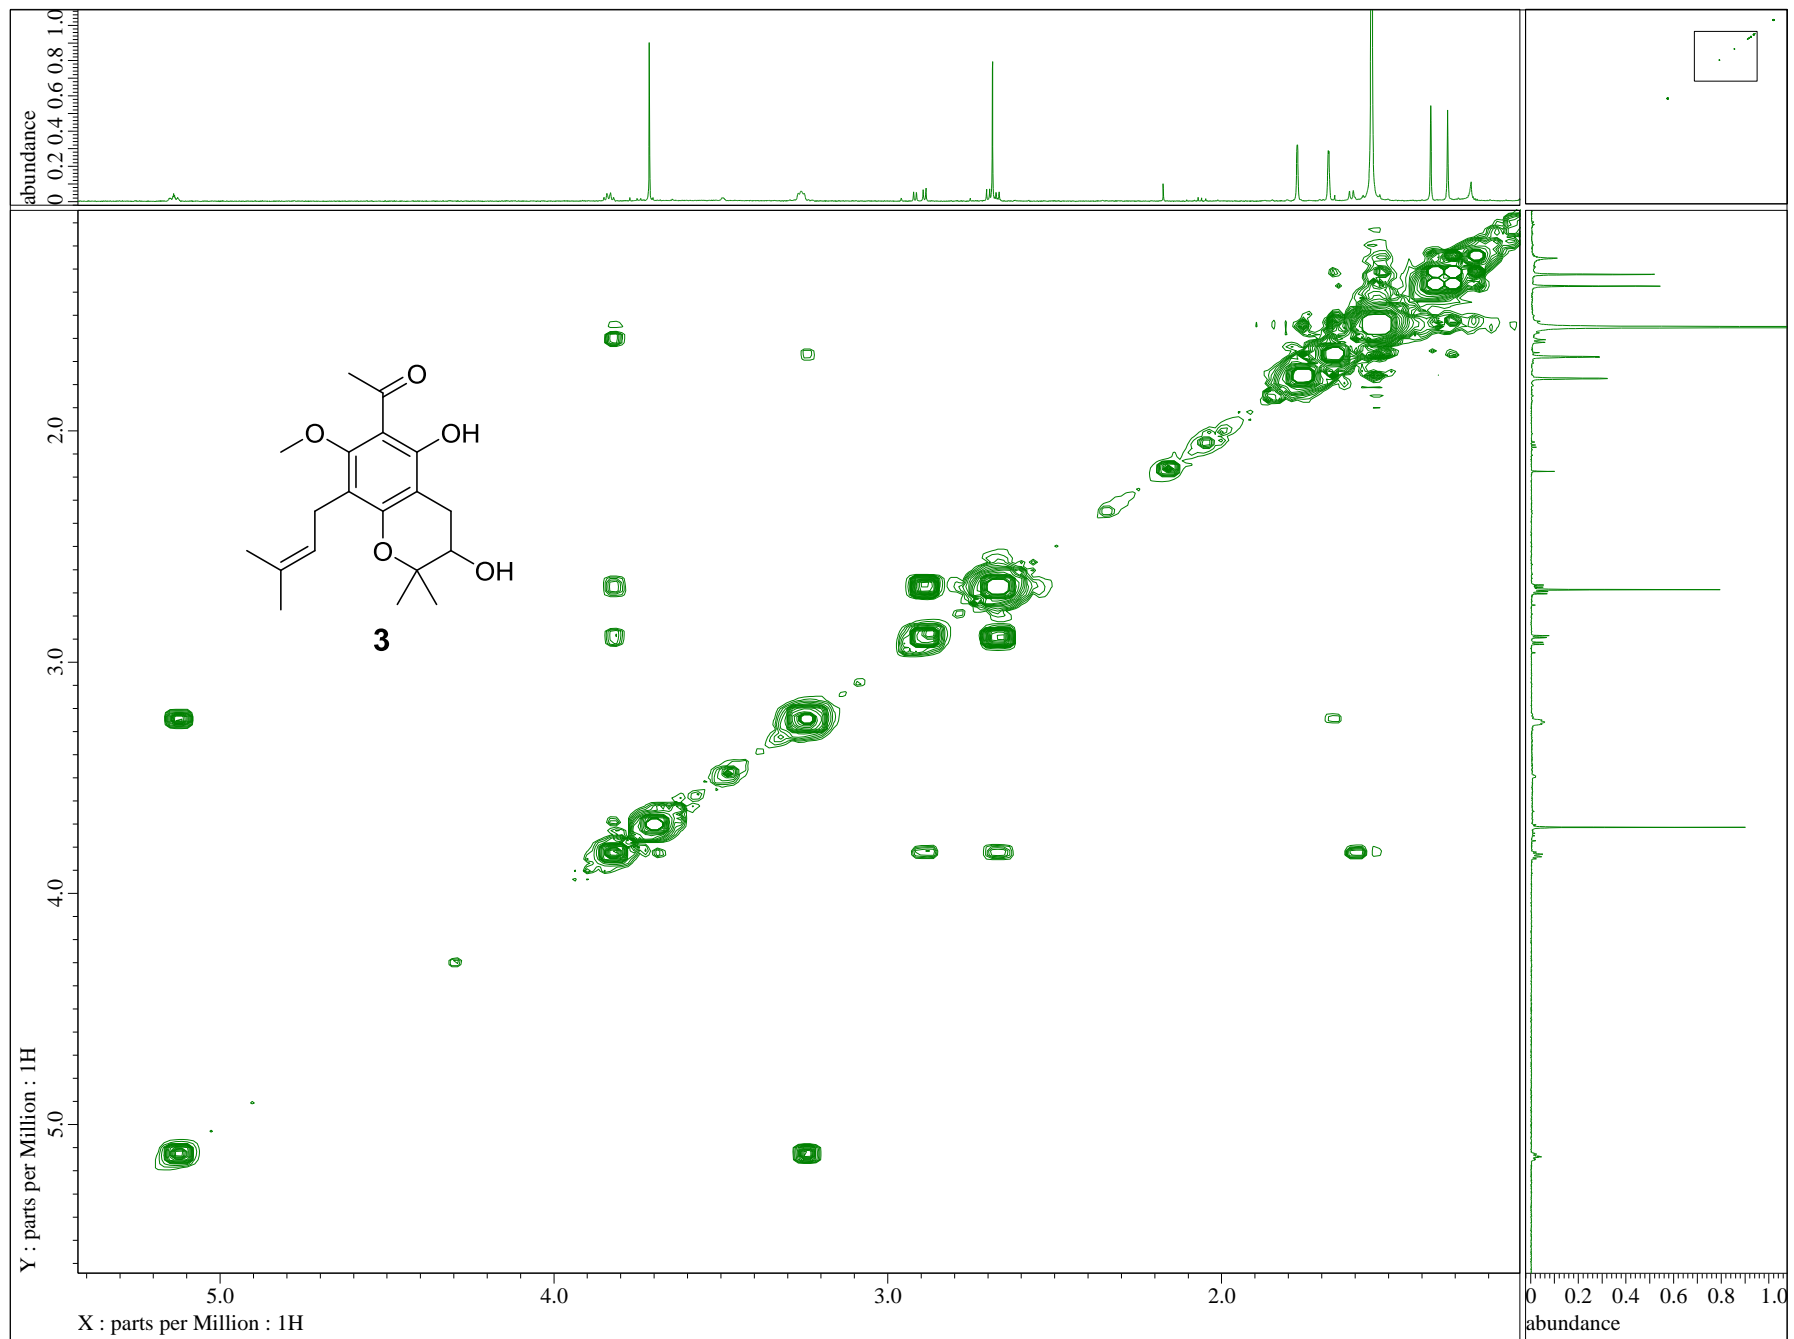

Figure S16. NOESY experiment of **3** (in CDCl<sub>3</sub>).

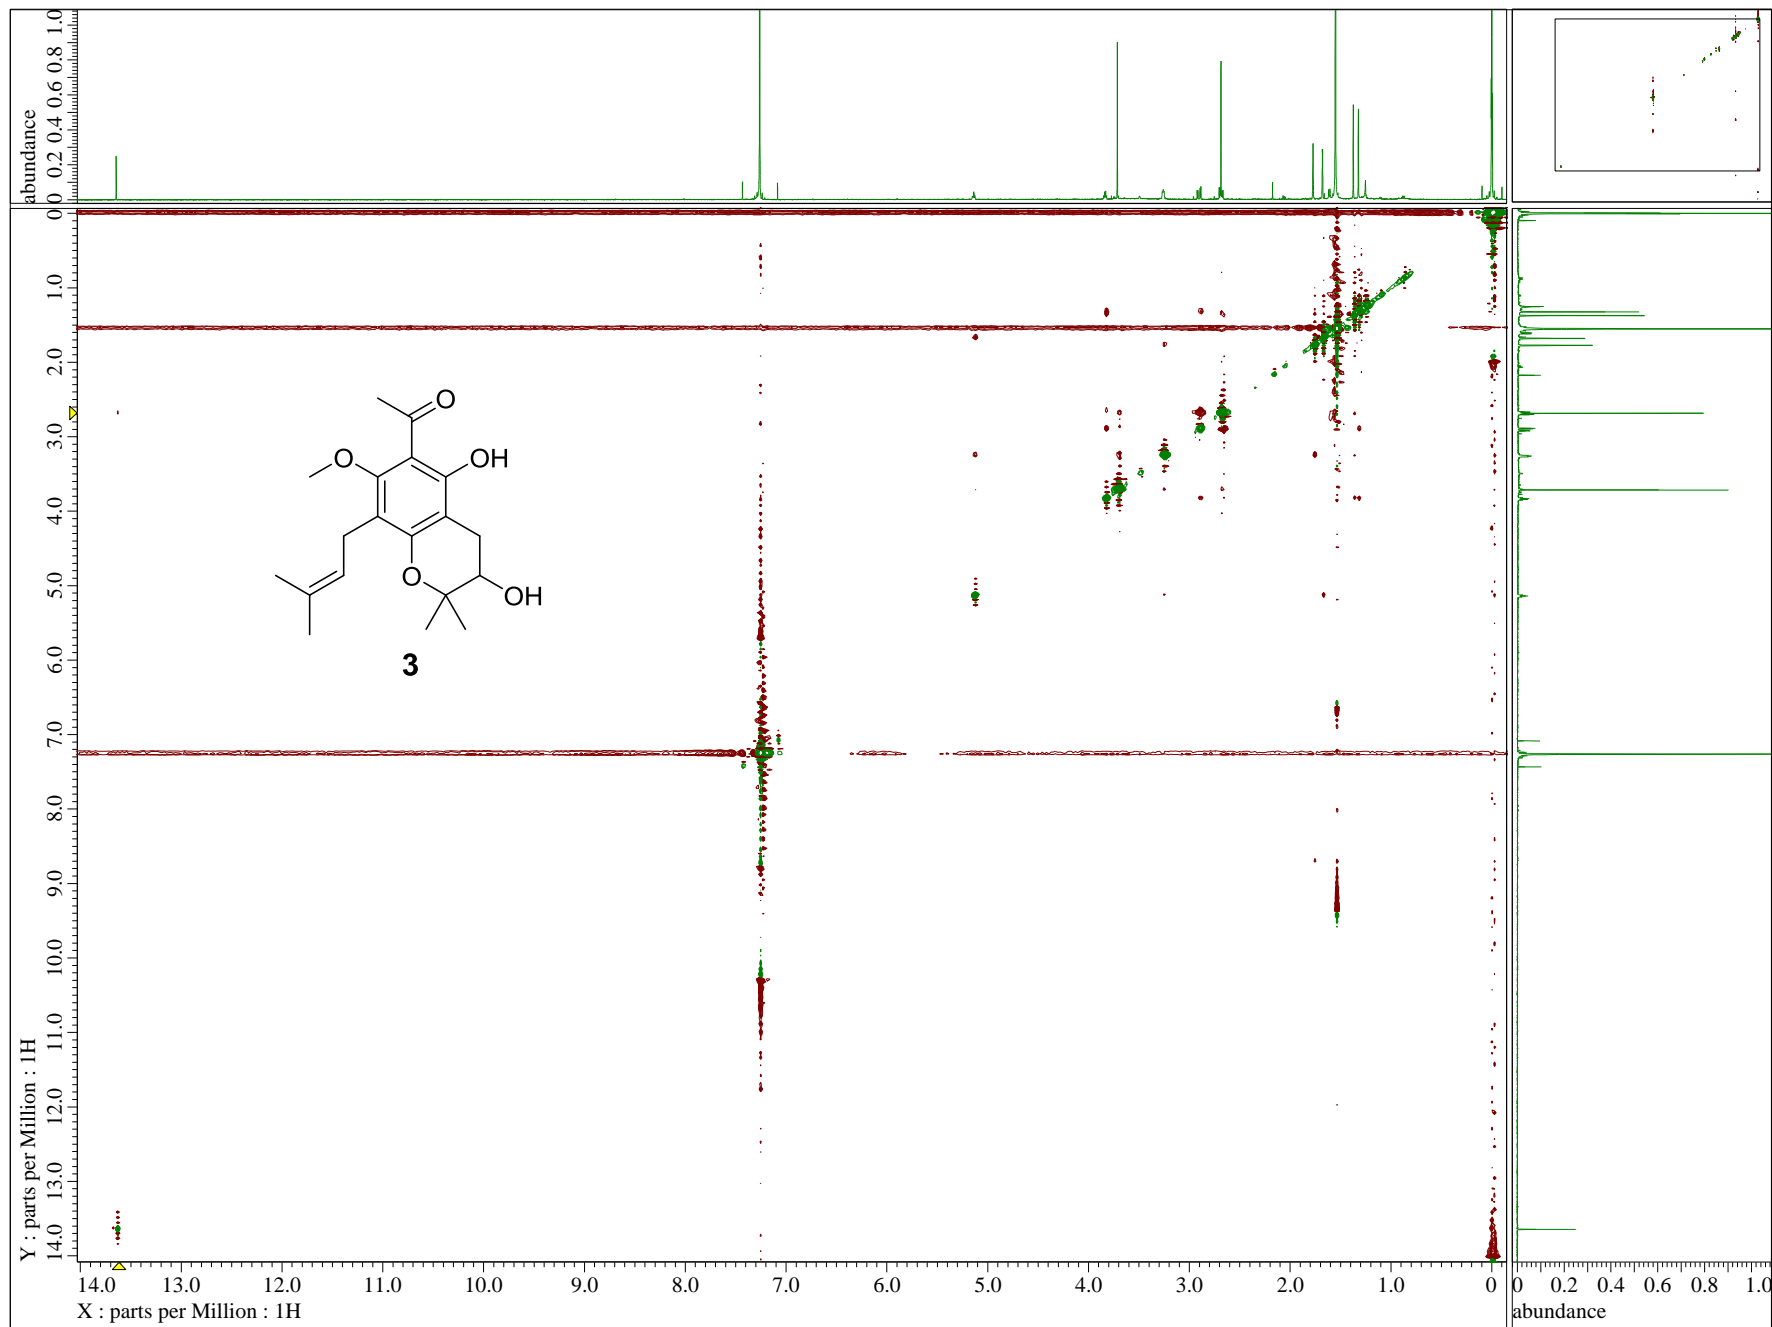

Figure S17. NOESY experiment of **3** (in CDCl<sub>3</sub>).

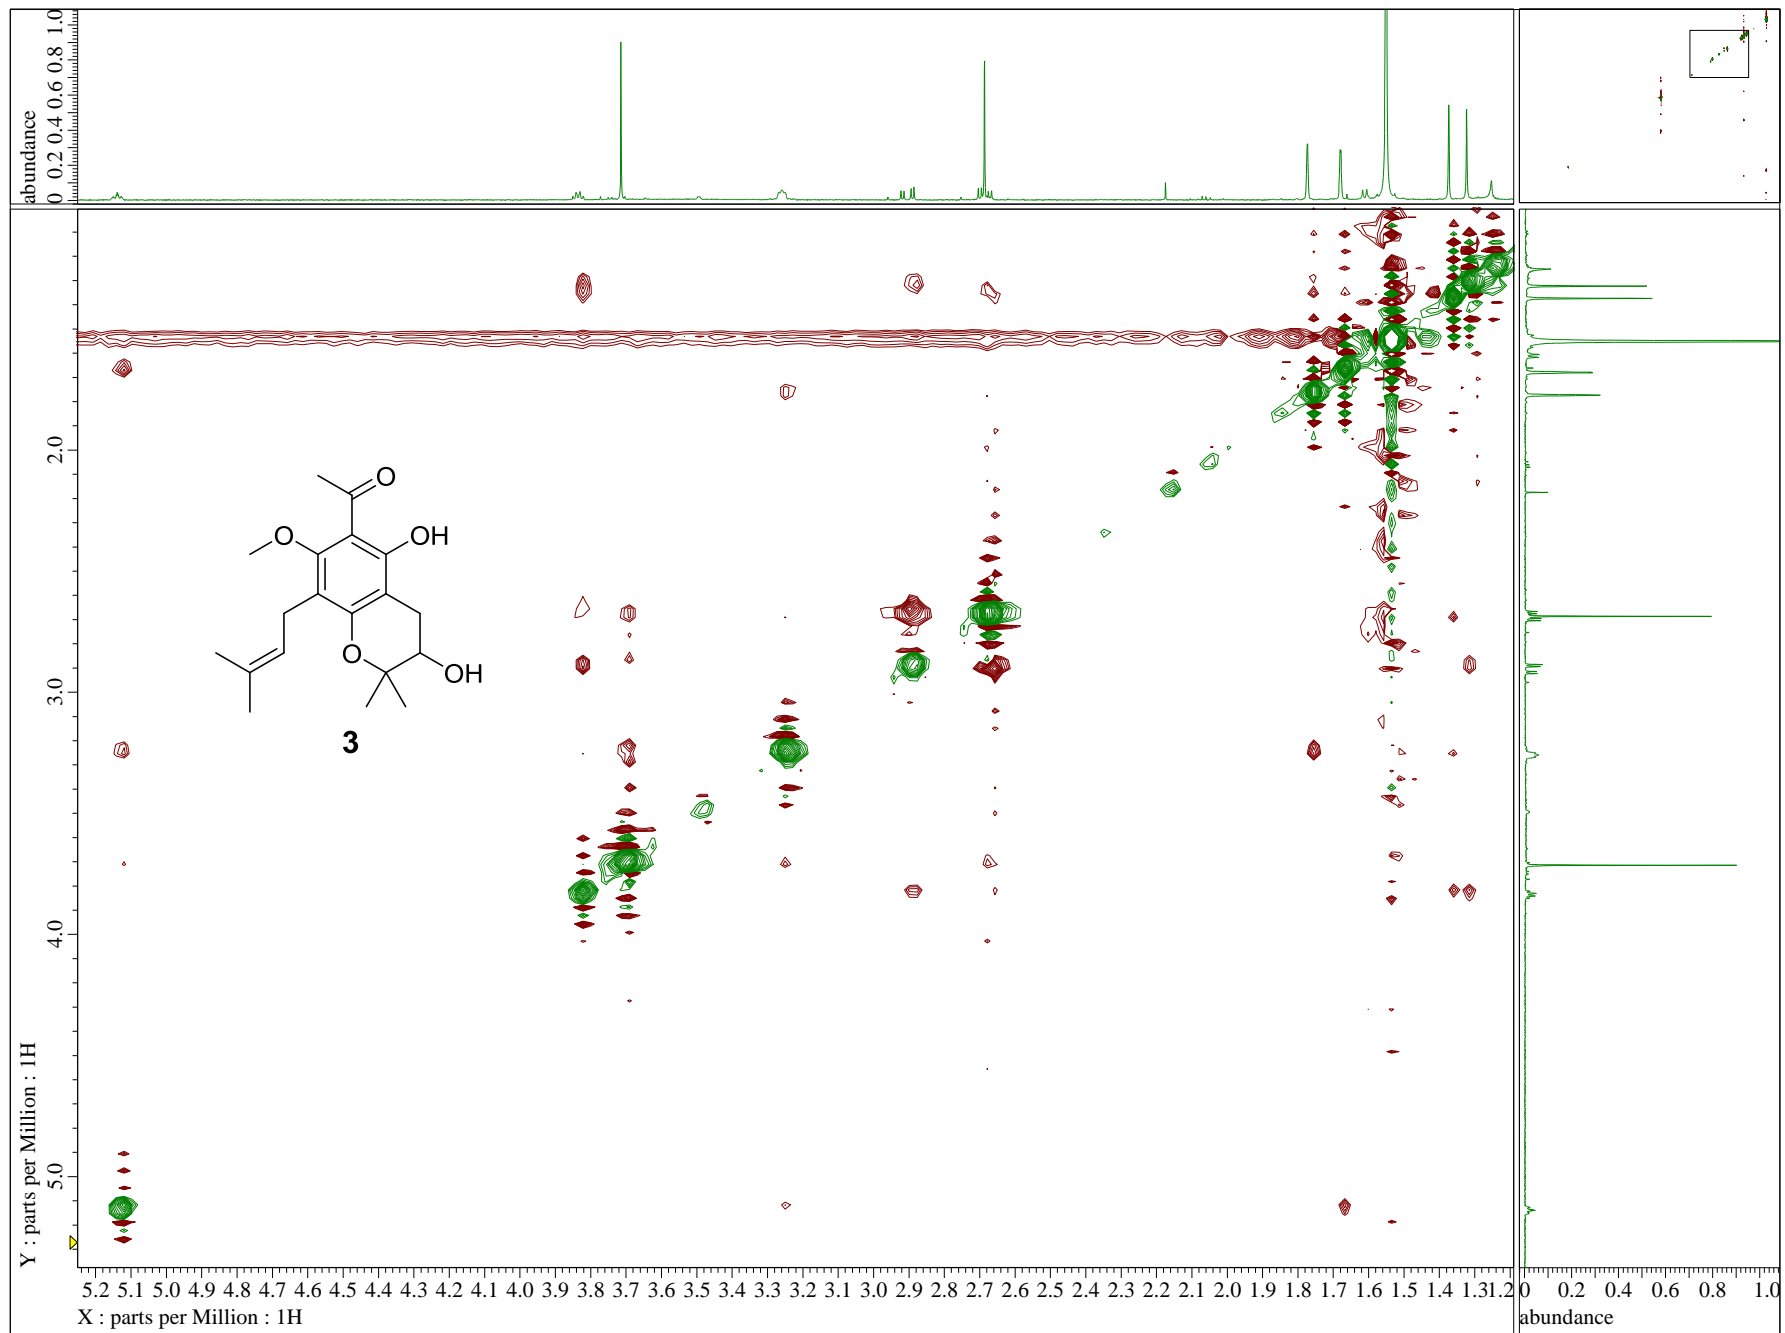

Figure S18. <sup>1</sup>H NMR spectrum of 4 (600 MHz, in CDCl<sub>3</sub>).

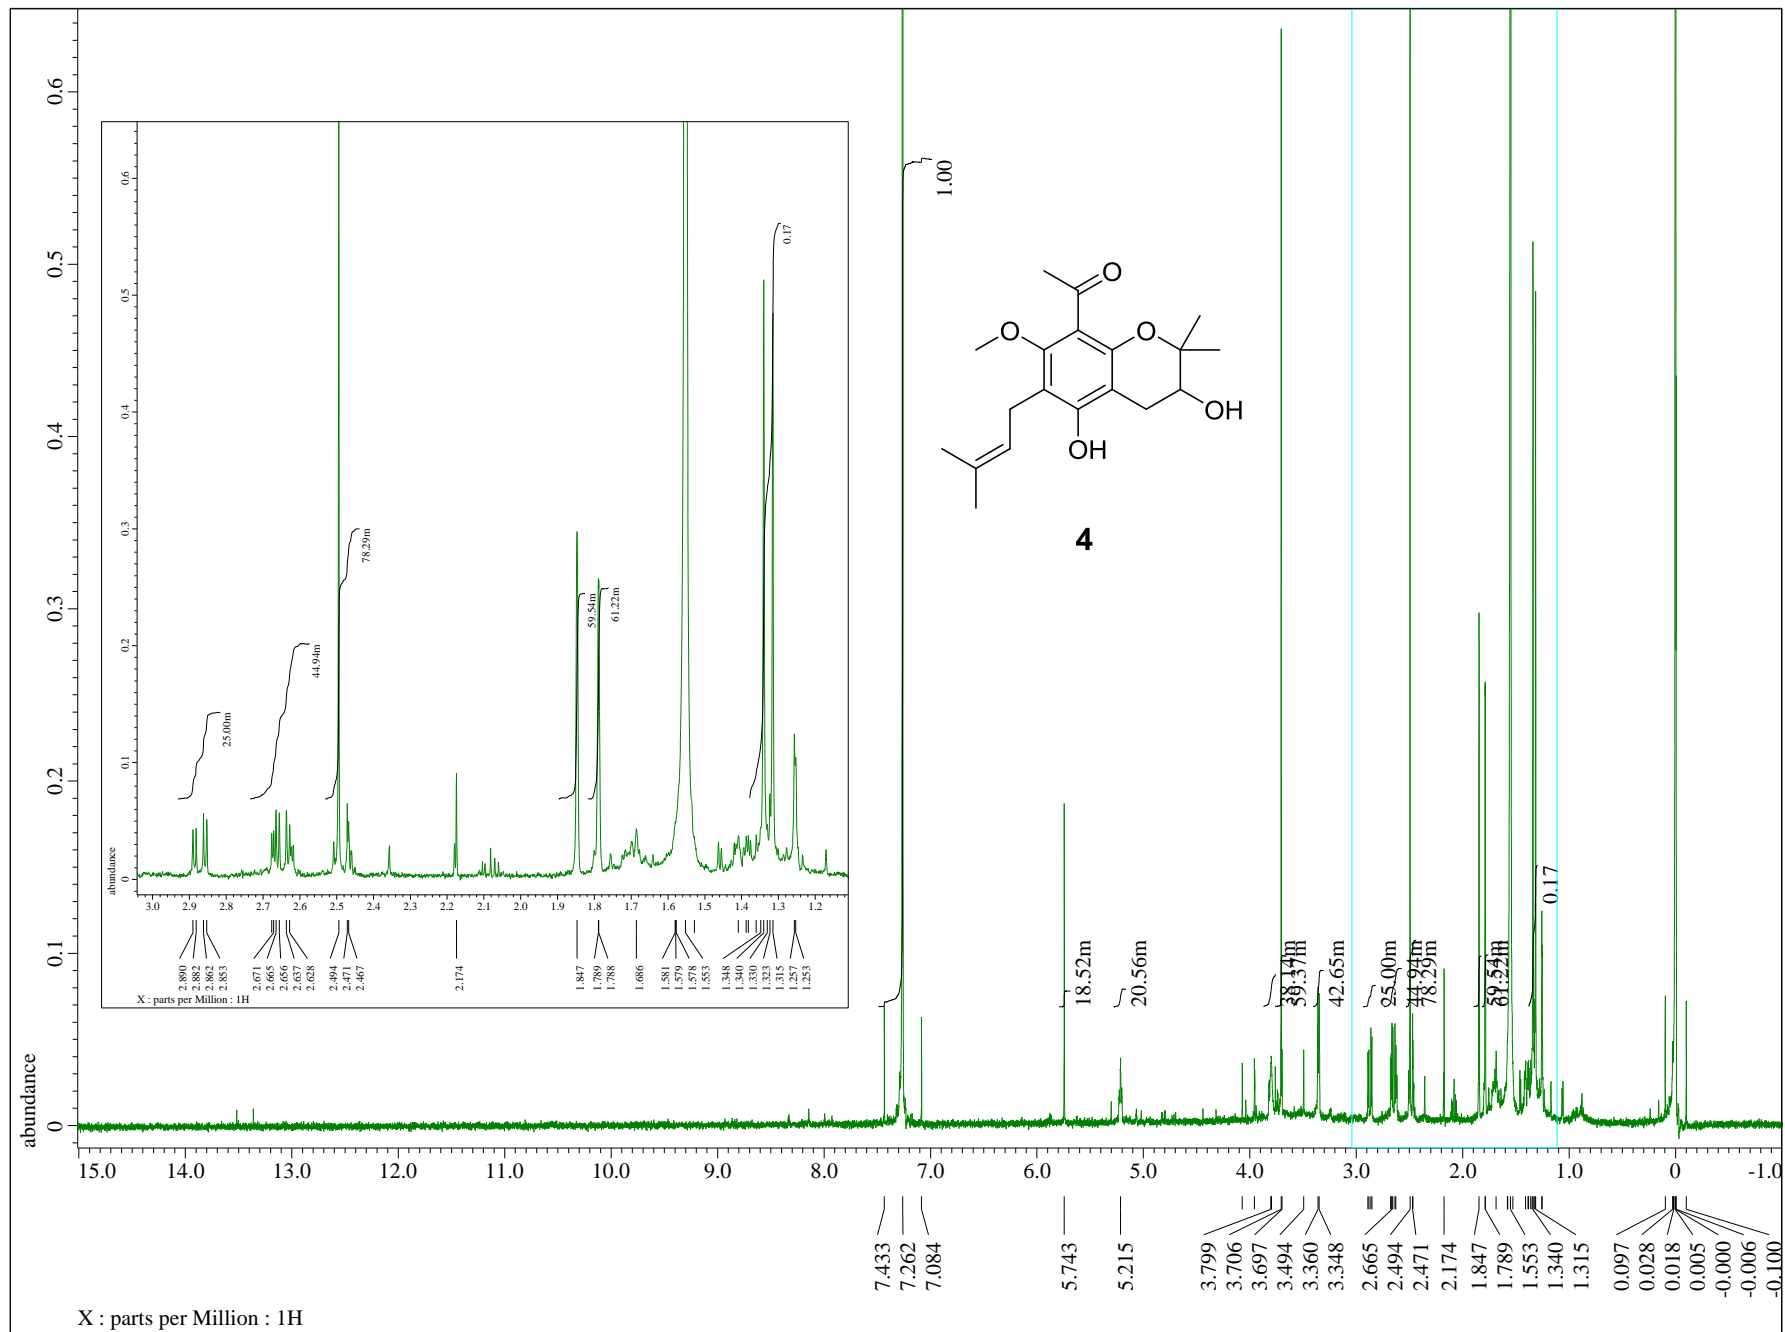

Figure S19. H-H COSY experiment of 4 (in CDCl<sub>3</sub>).

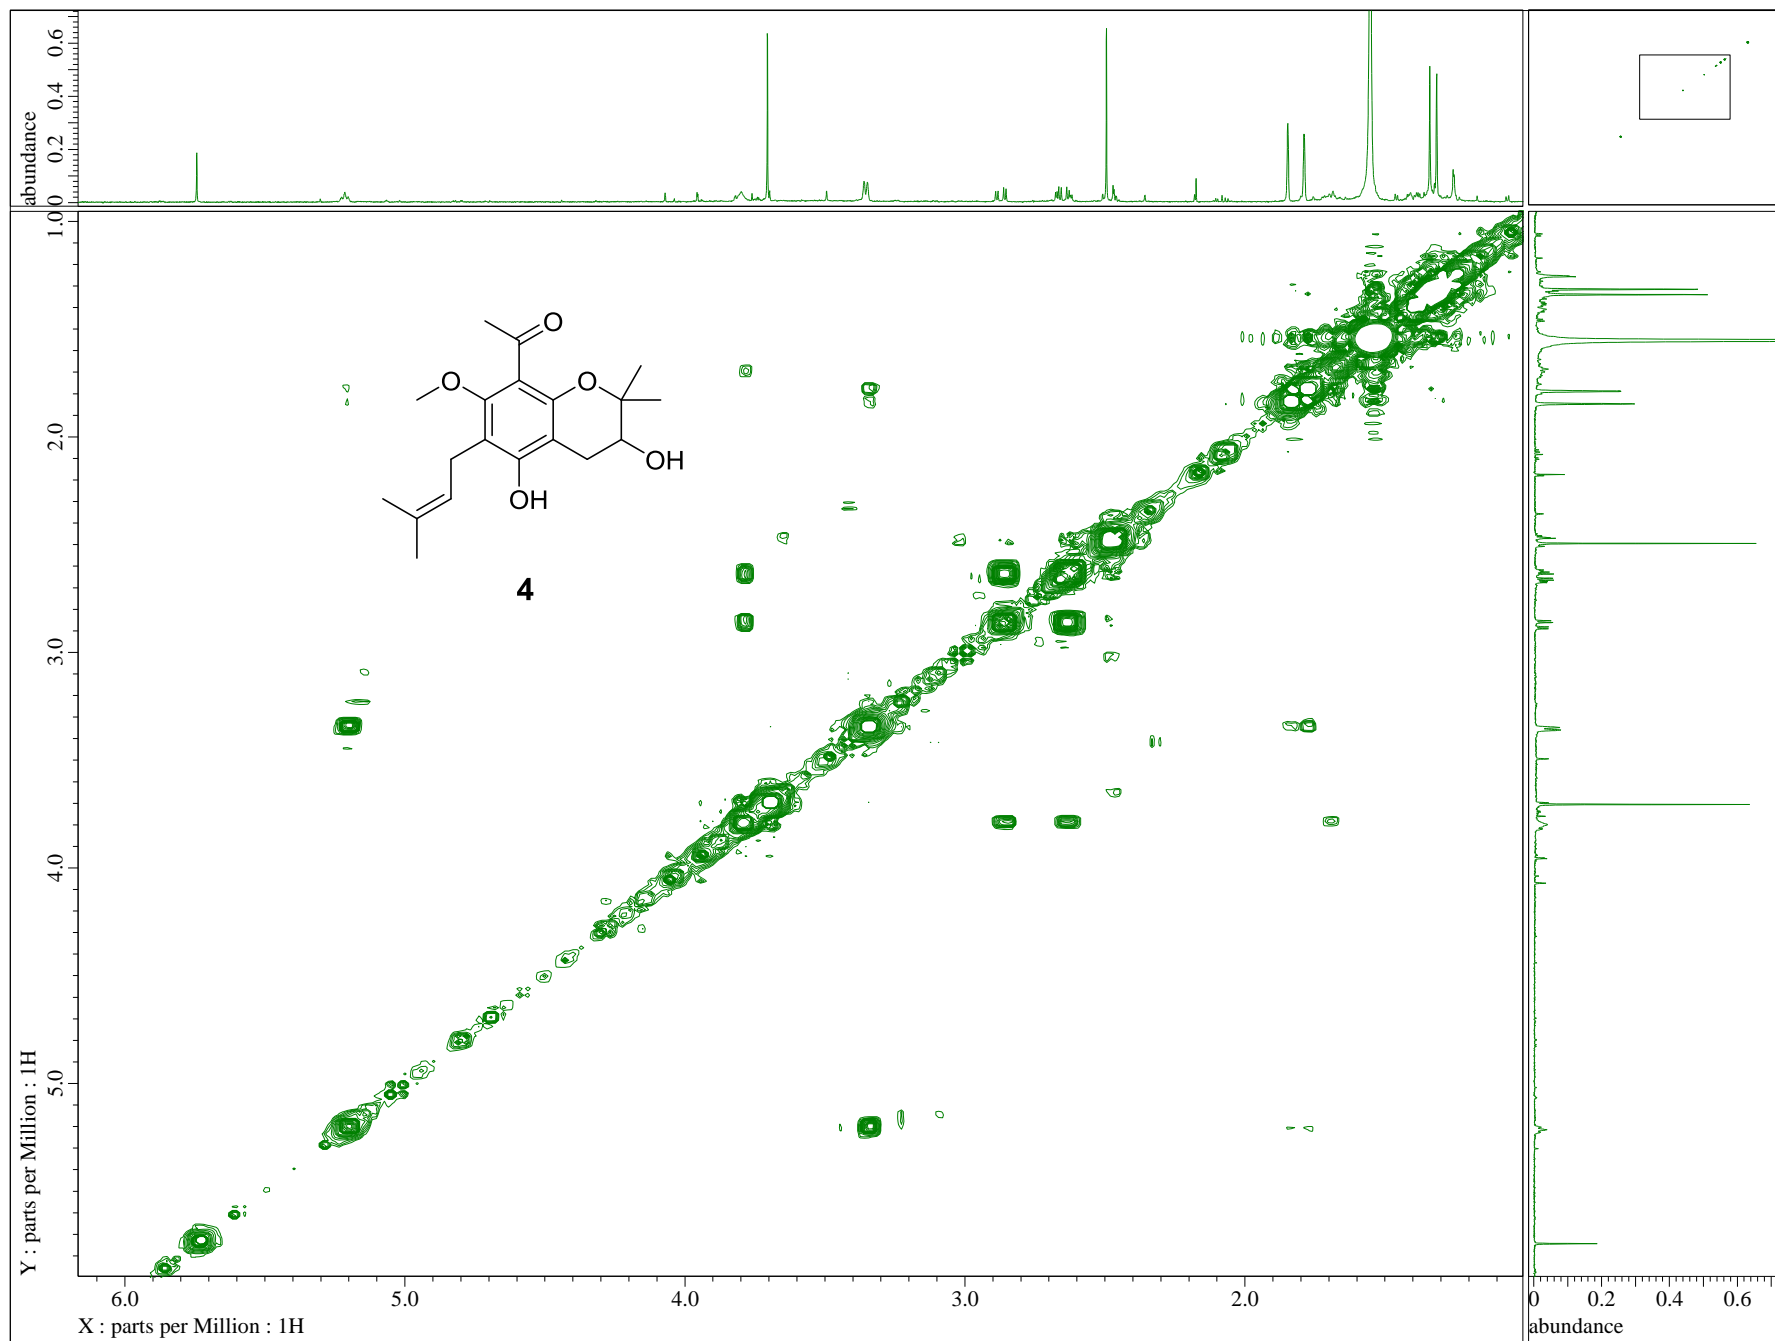

Figure S20. NOESY experiment of 4 (in CDCl<sub>3</sub>).

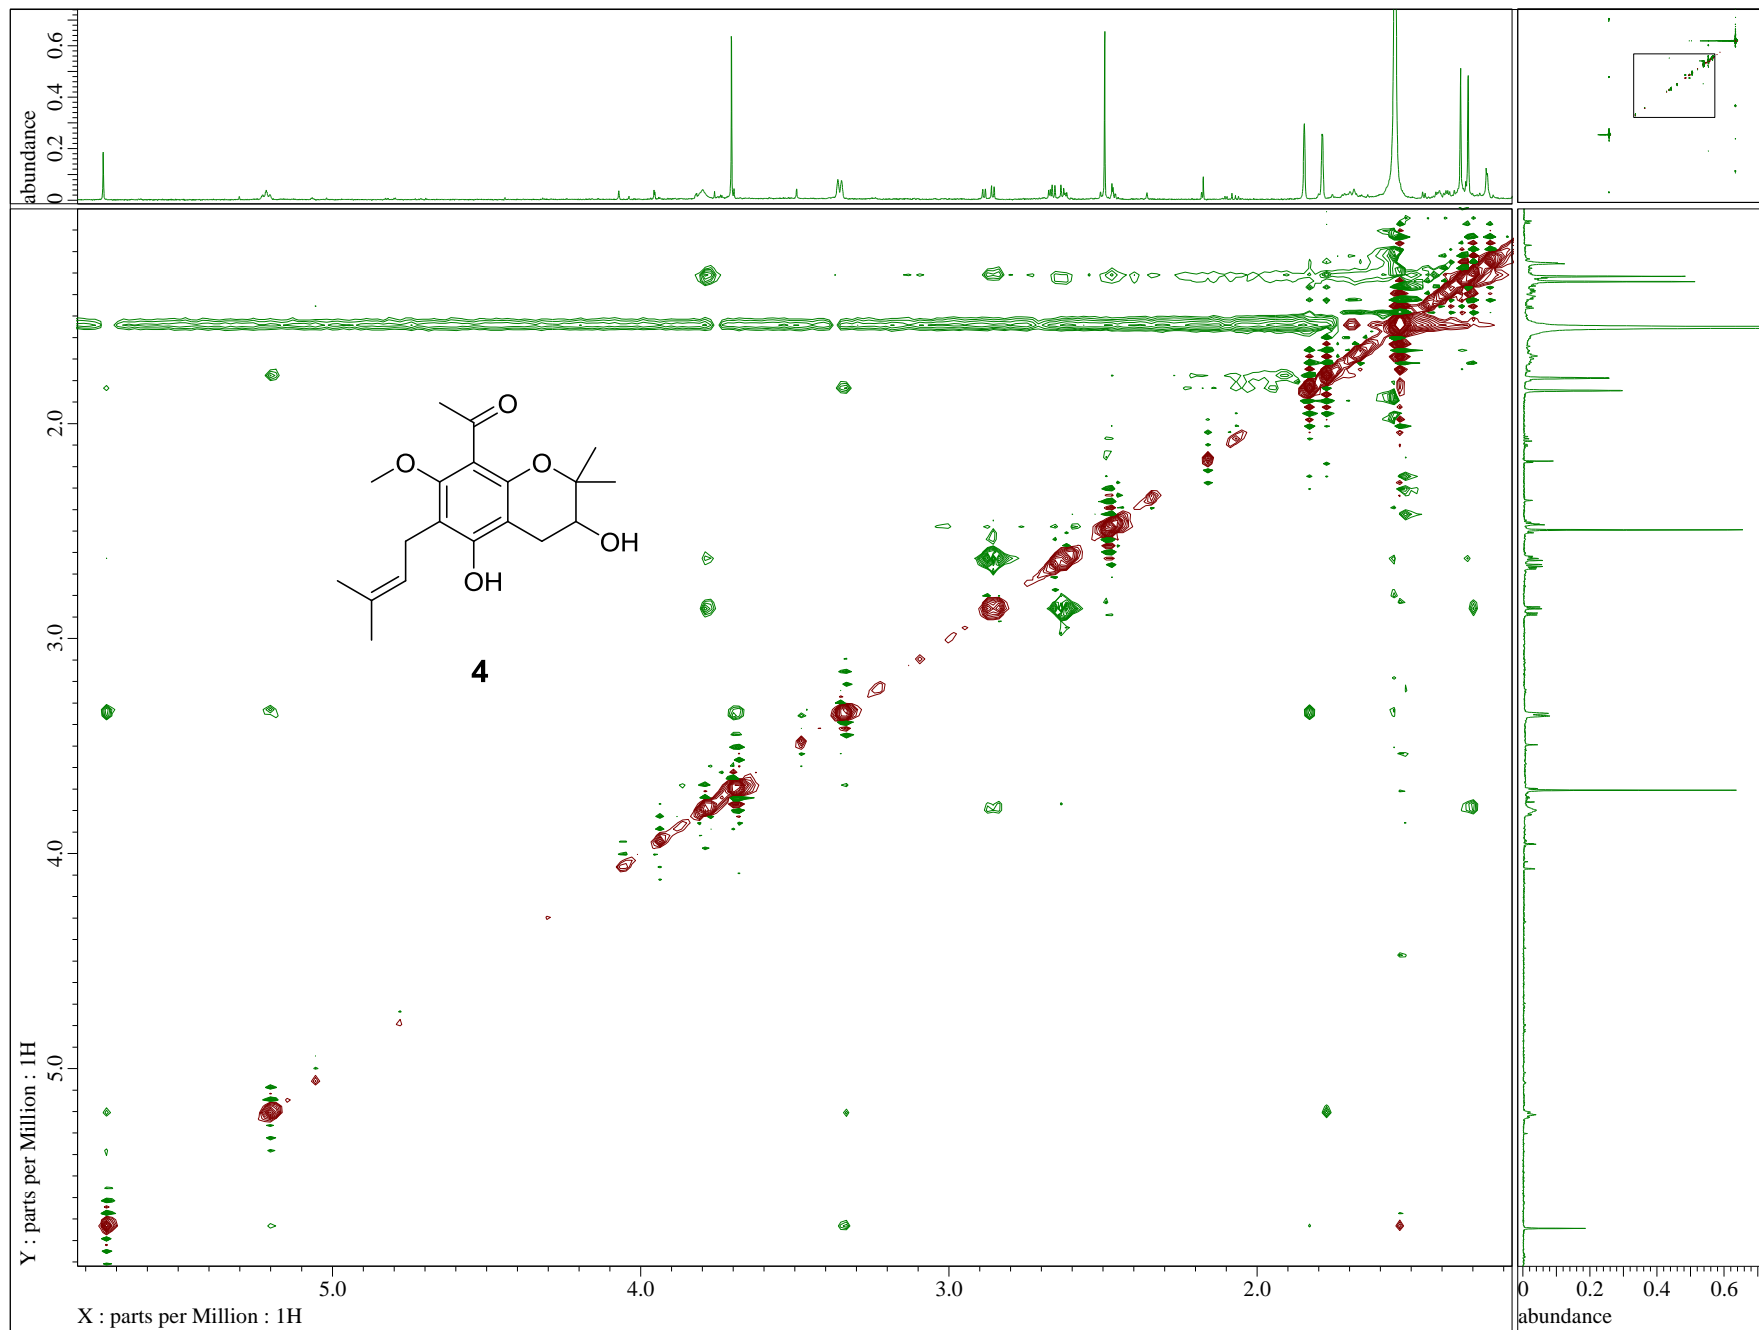

Figure S21.  $^1\text{H}$  NMR spectrum of **5** (600 MHz, in  $\text{CDCl}_3$ ).

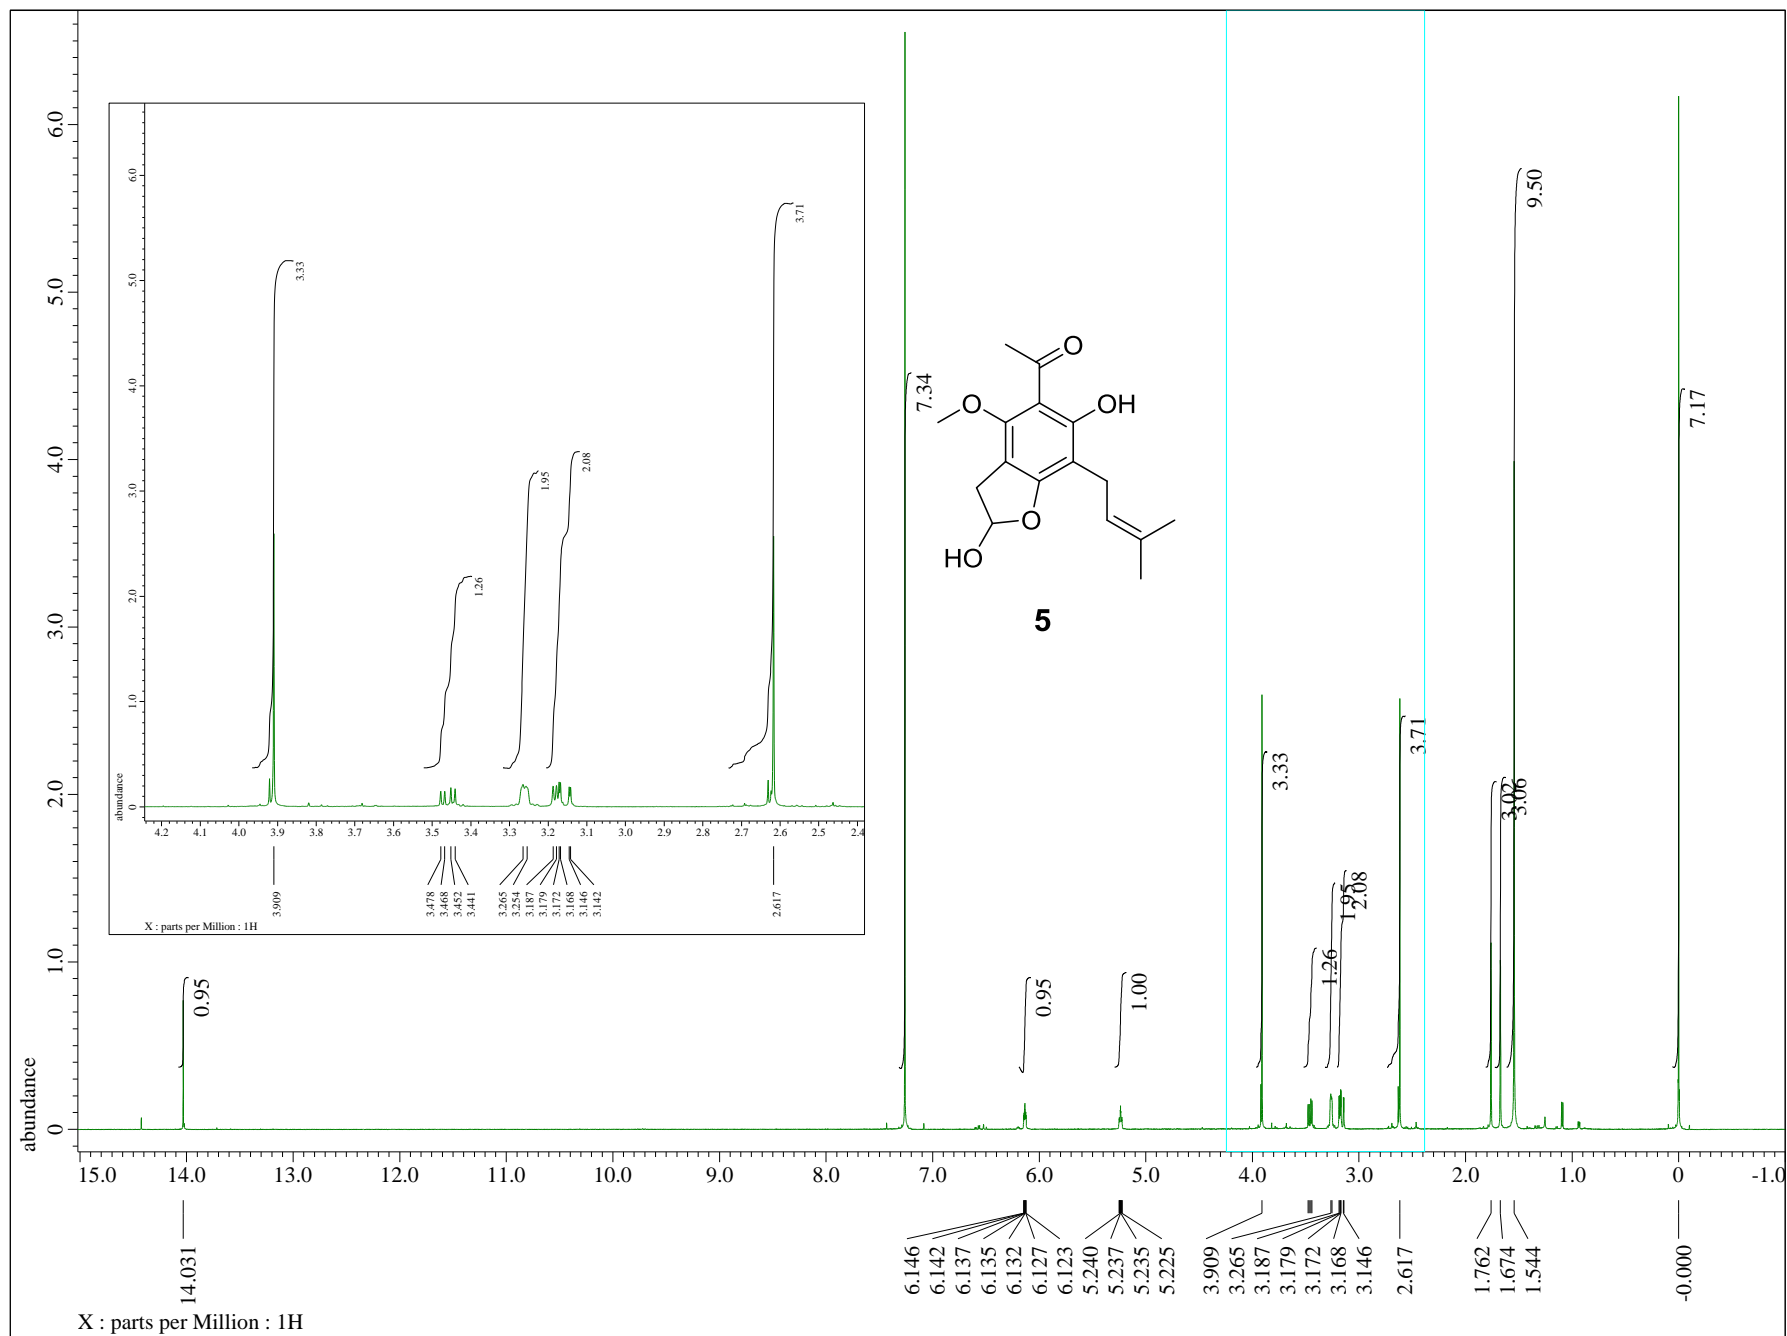



Figure S22.  $^{13}\text{C}$  NMR spectrum of **5** (150 MHz, in  $\text{CDCl}_3$ ).

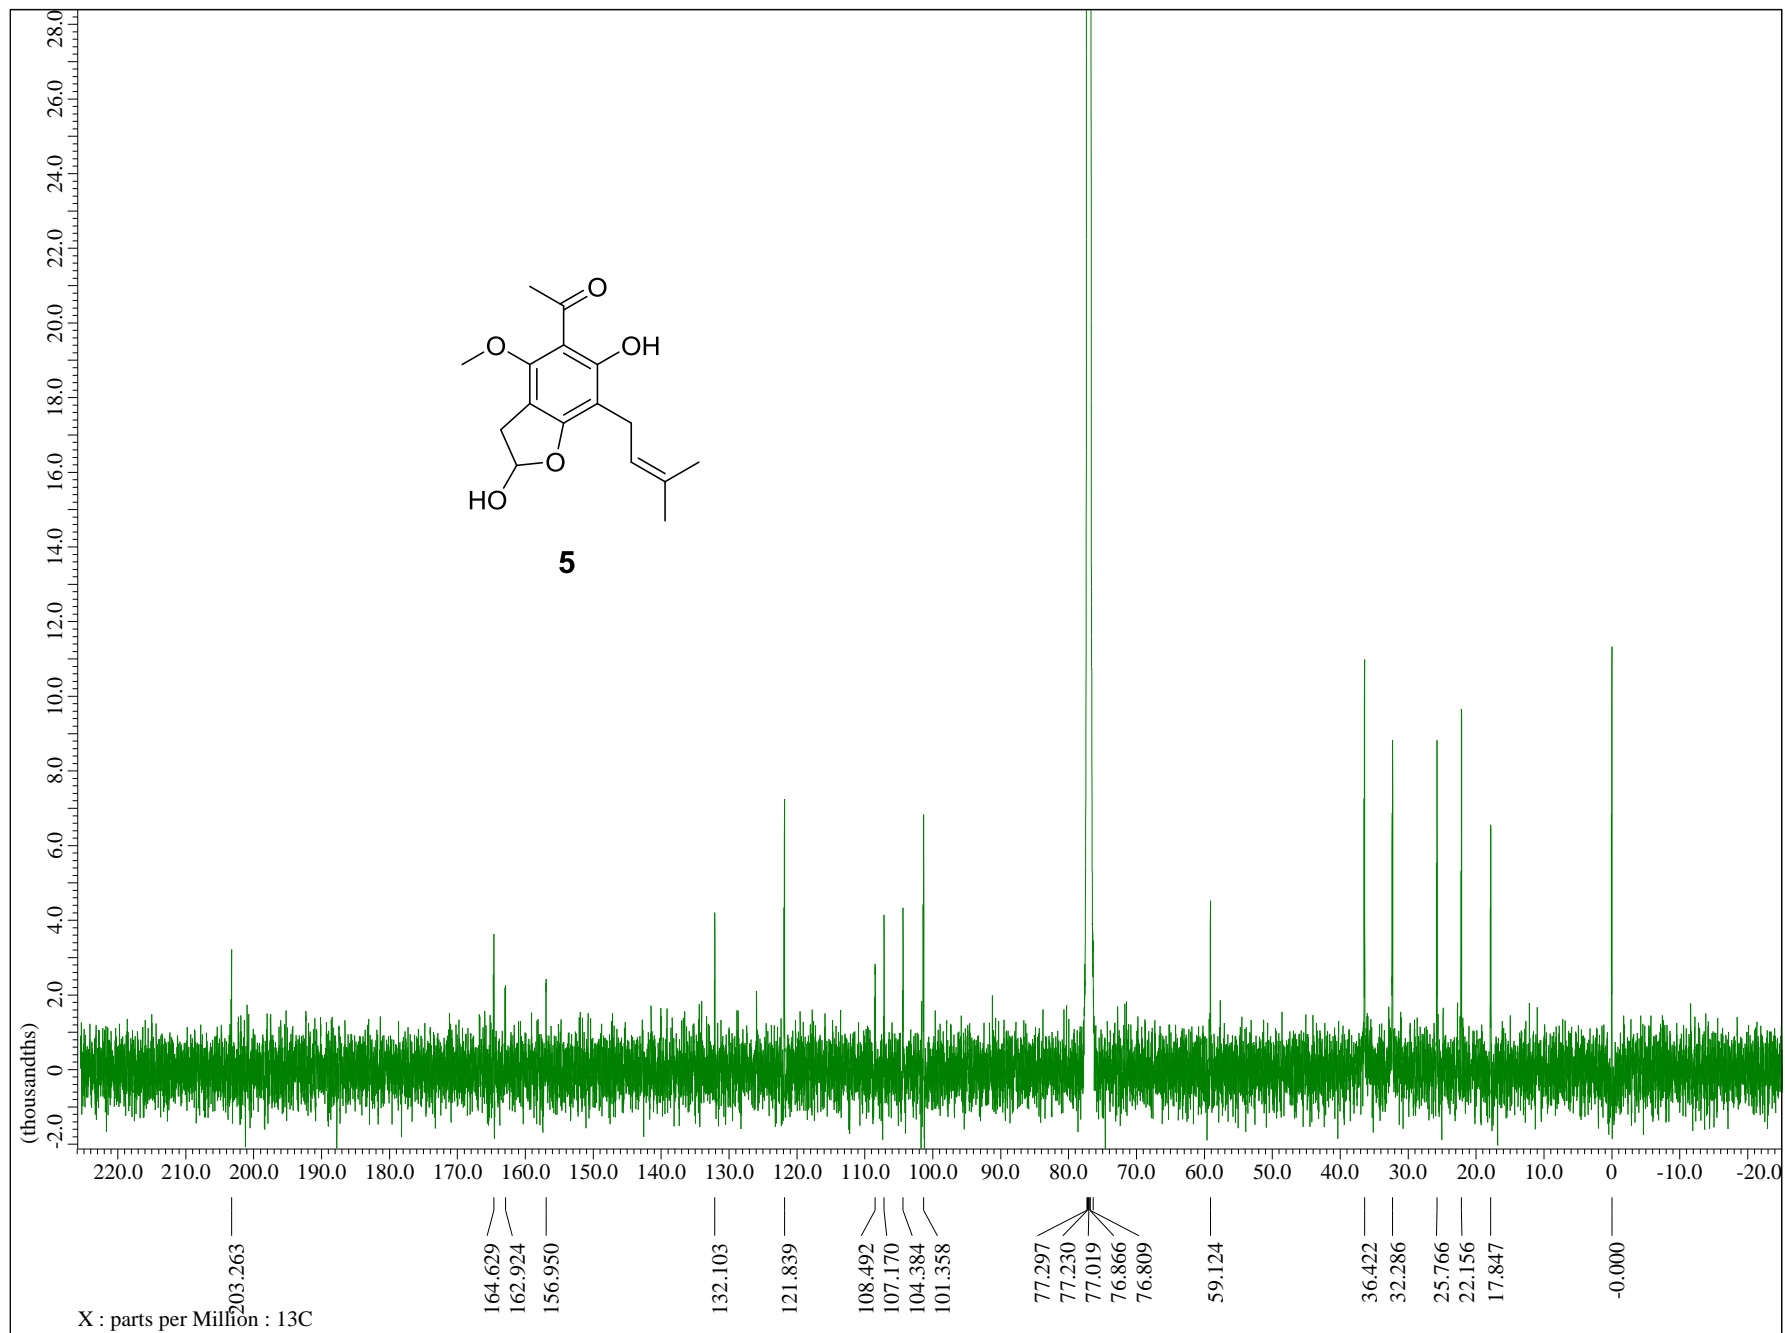

Figure S23. H-H COSY experiment of 5 (in CDCl<sub>3</sub>).

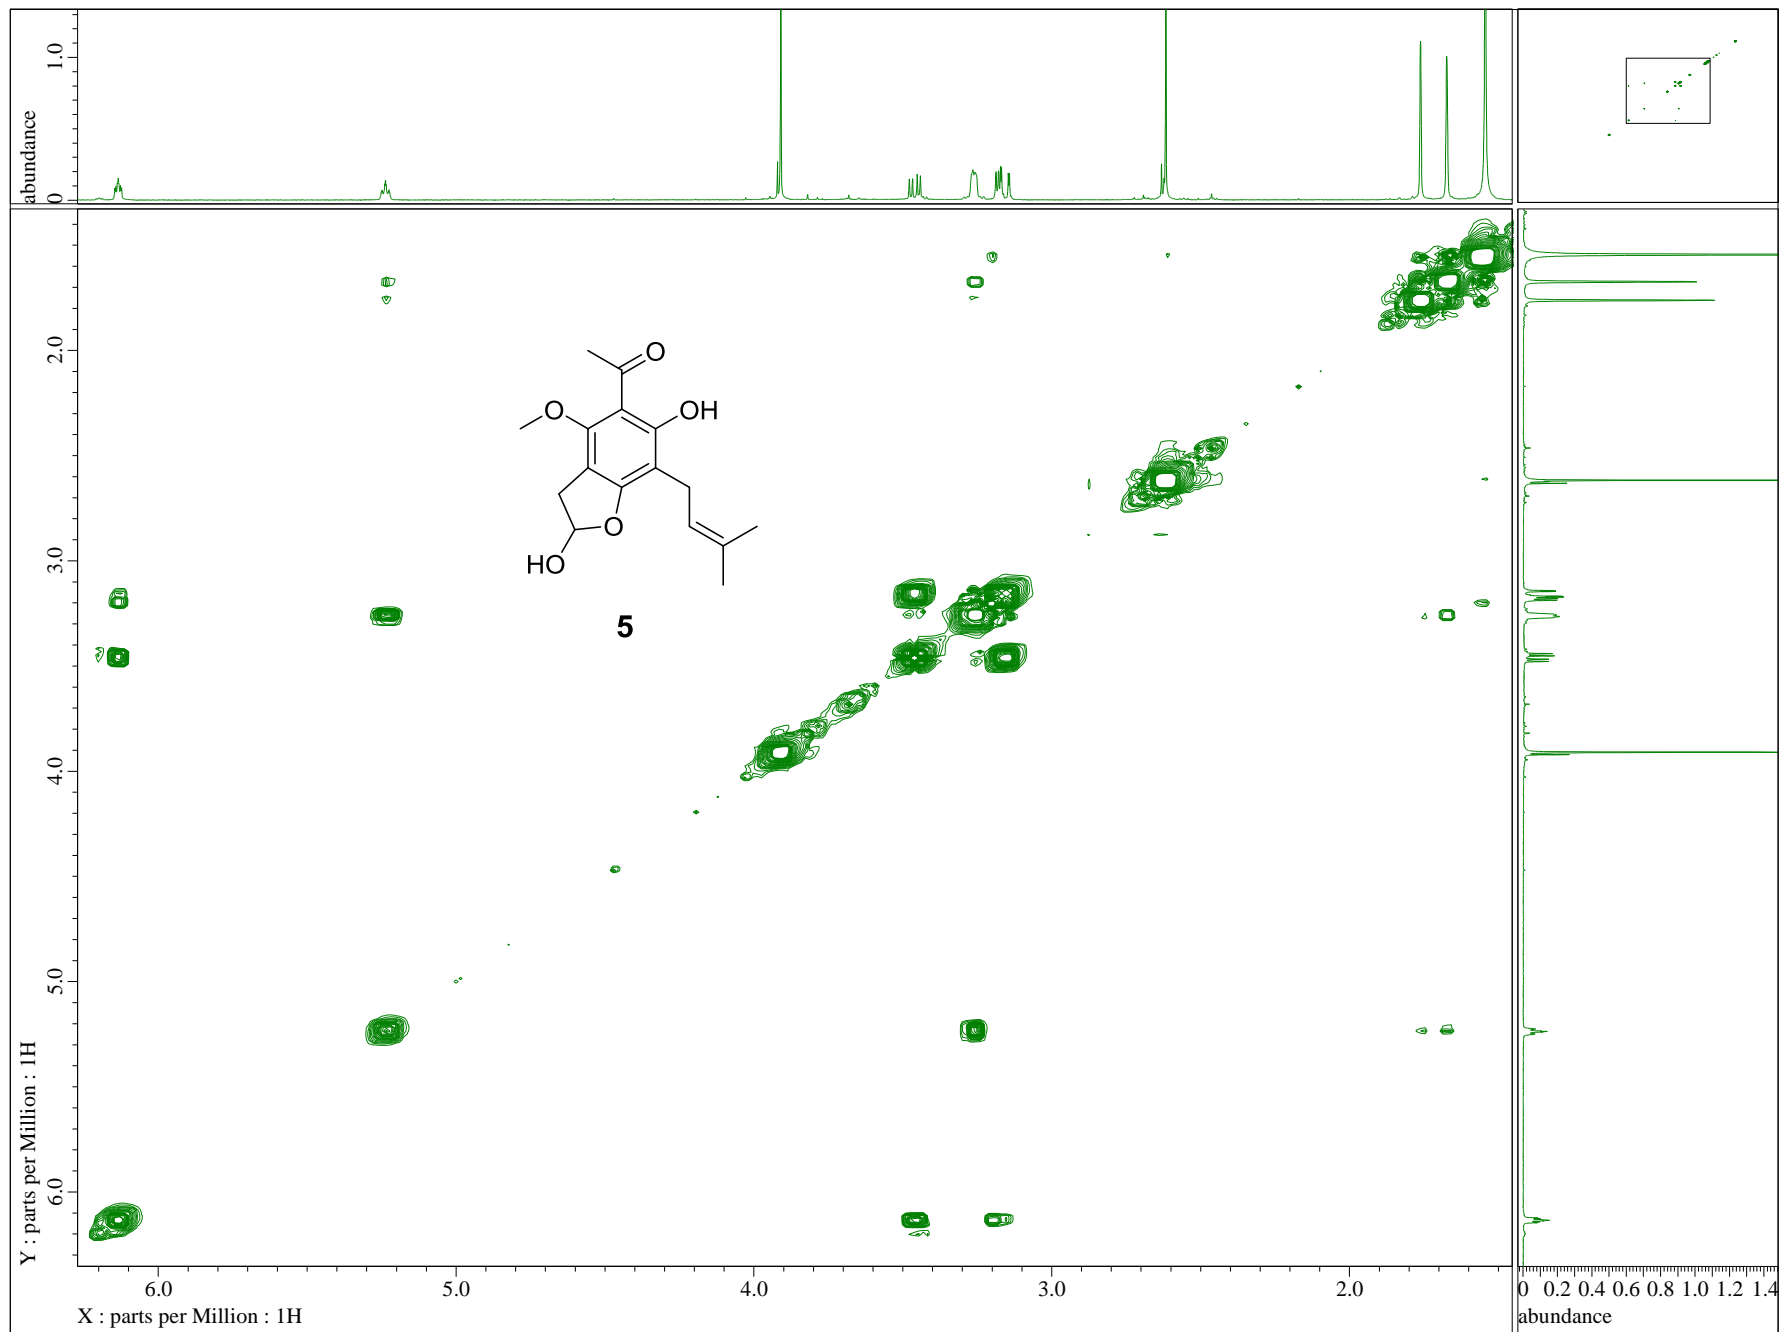

Figure S24. NOESY experiment of 5 (in CDCl<sub>3</sub>).

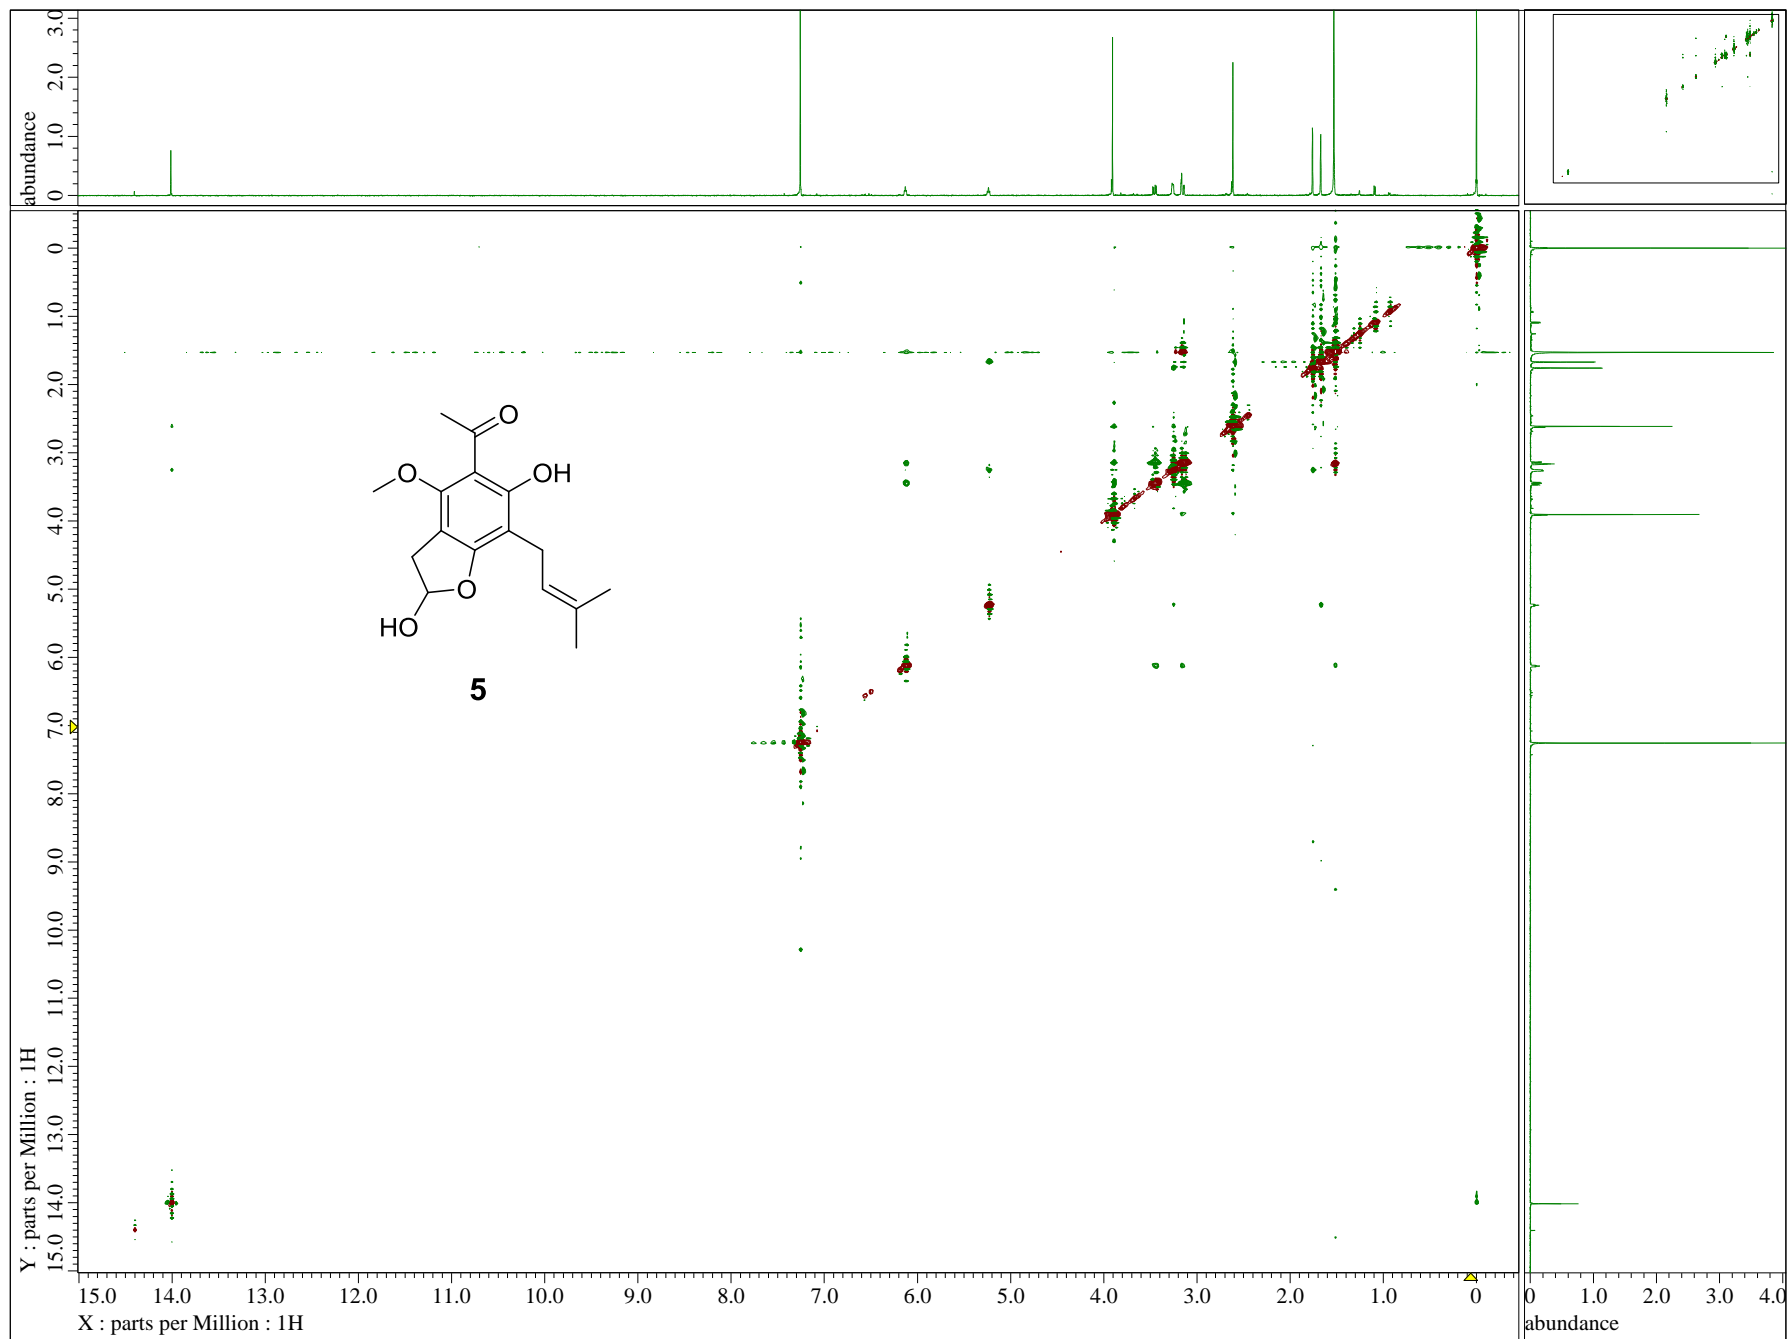

Figure S25. NOESY experiment of 5 (in CDCl<sub>3</sub>).

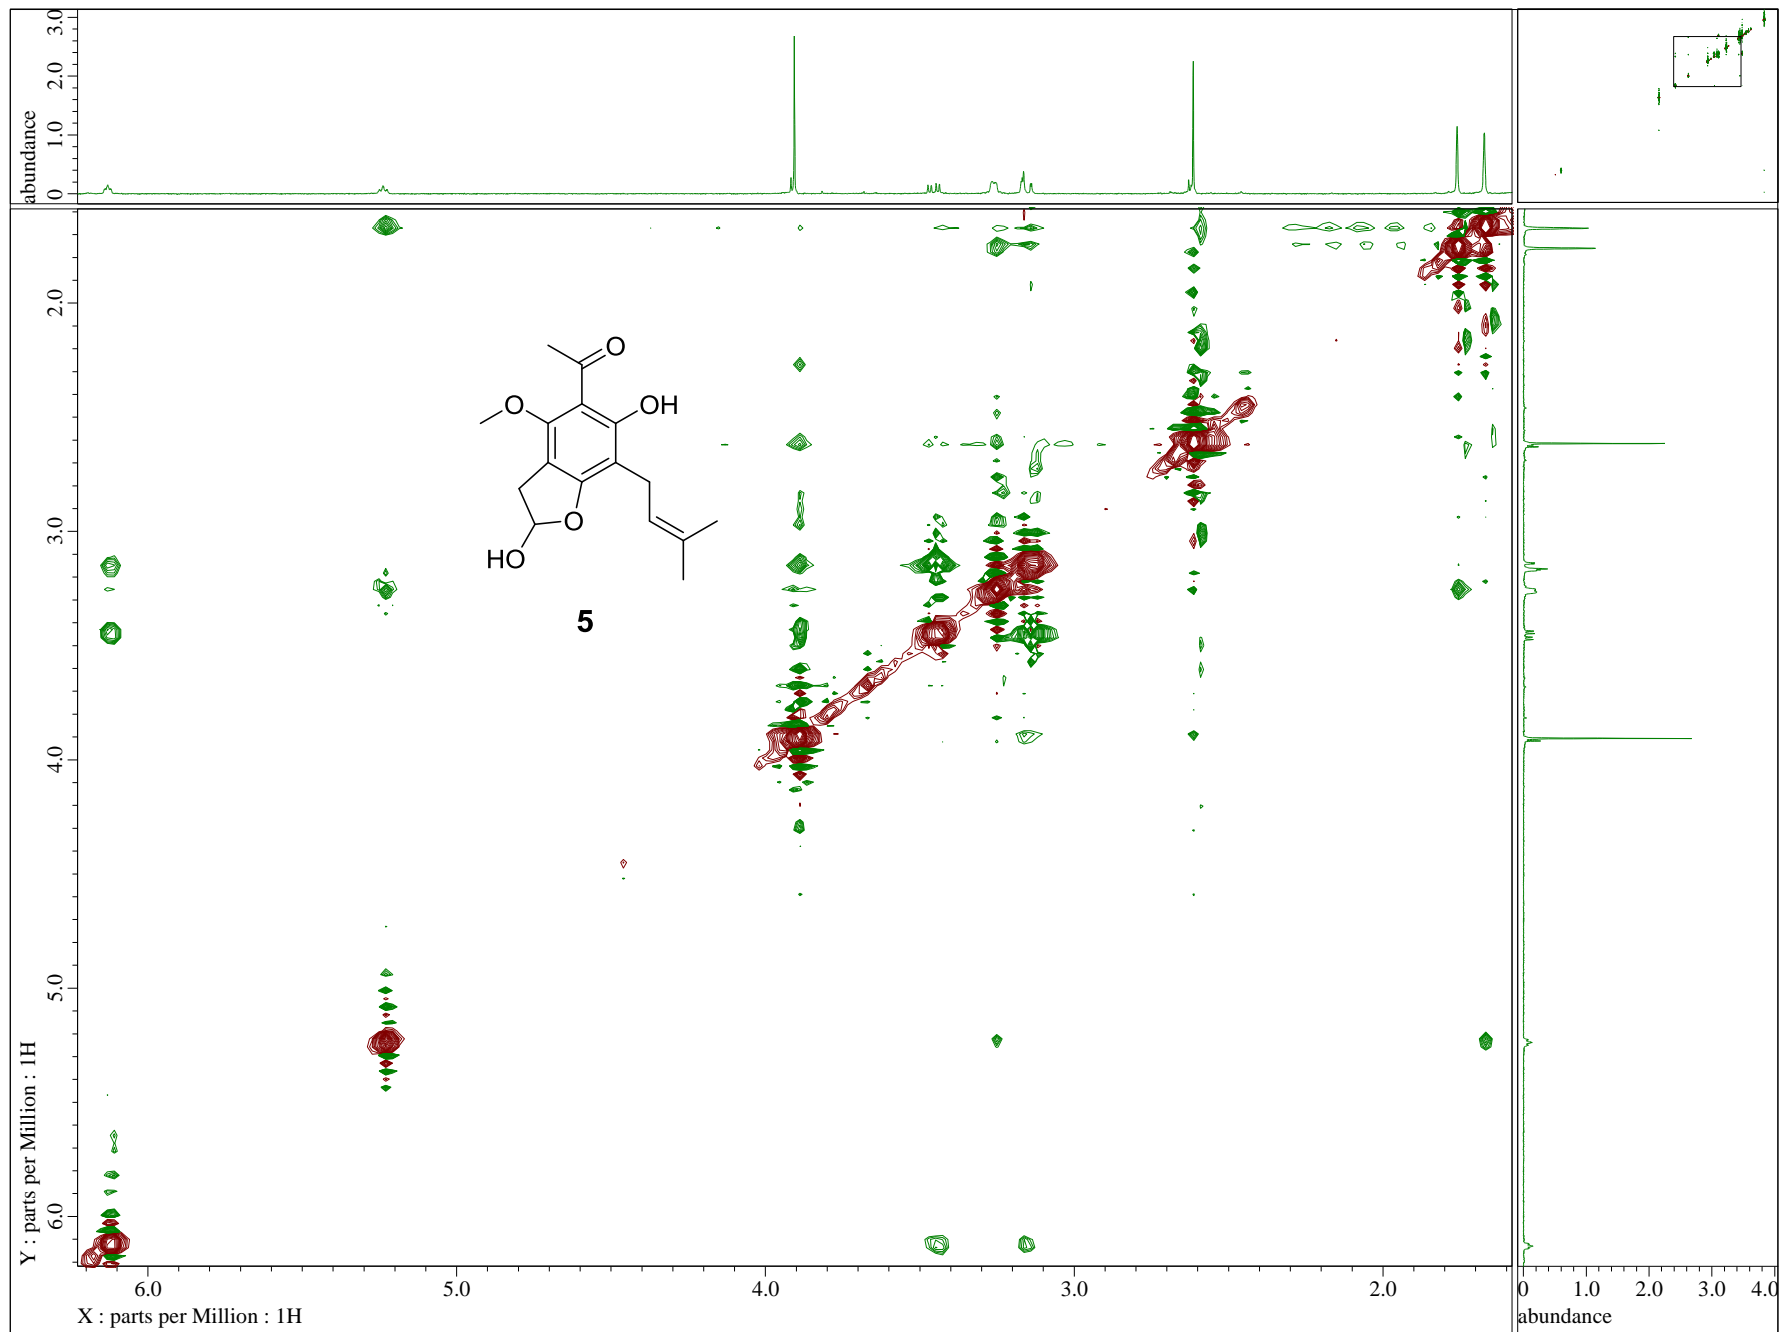

Figure S26. HMQC experiment of 5 (in CDCl<sub>3</sub>).

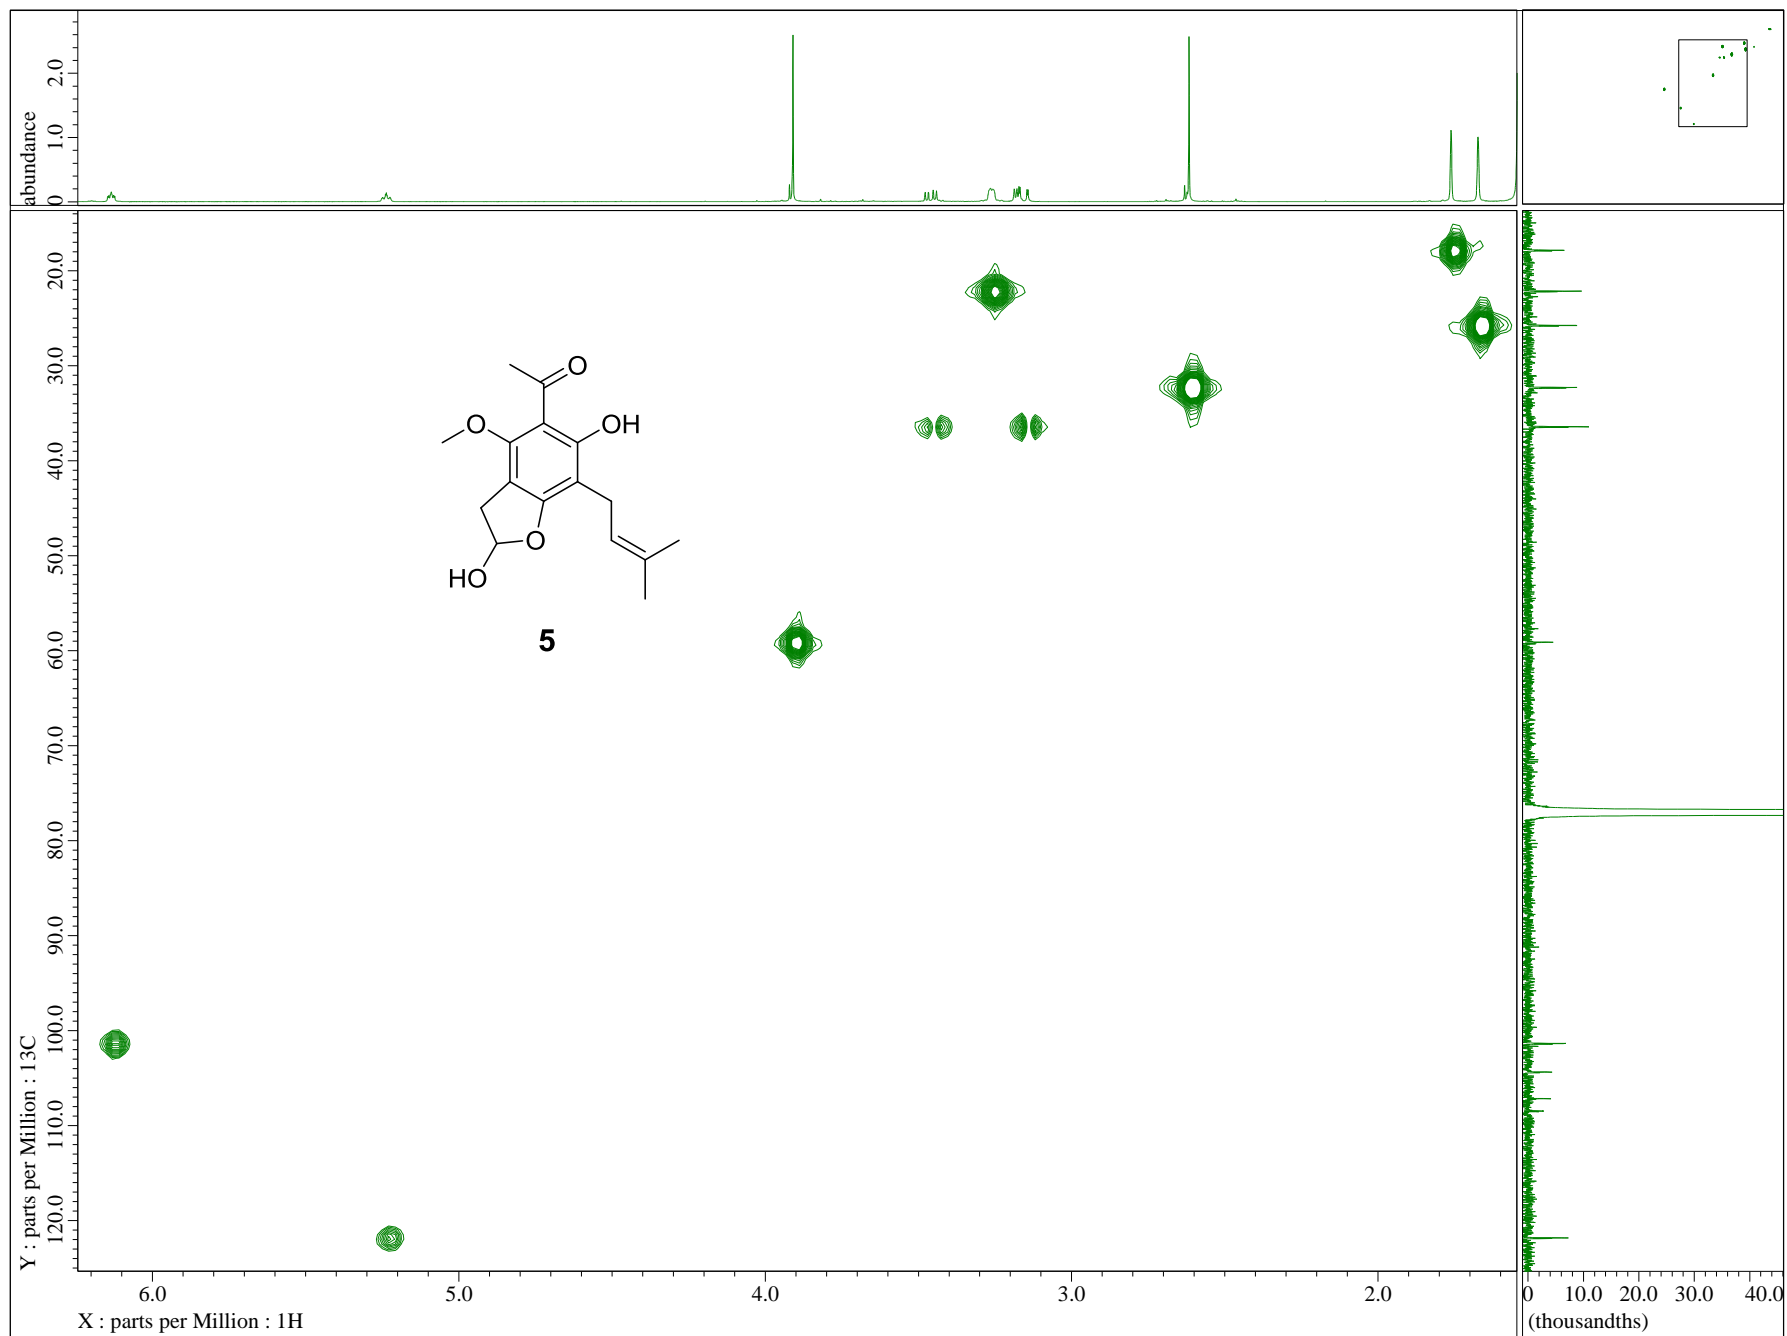

Figure S27. HMBC experiment of 5 (in CDCl<sub>3</sub>).

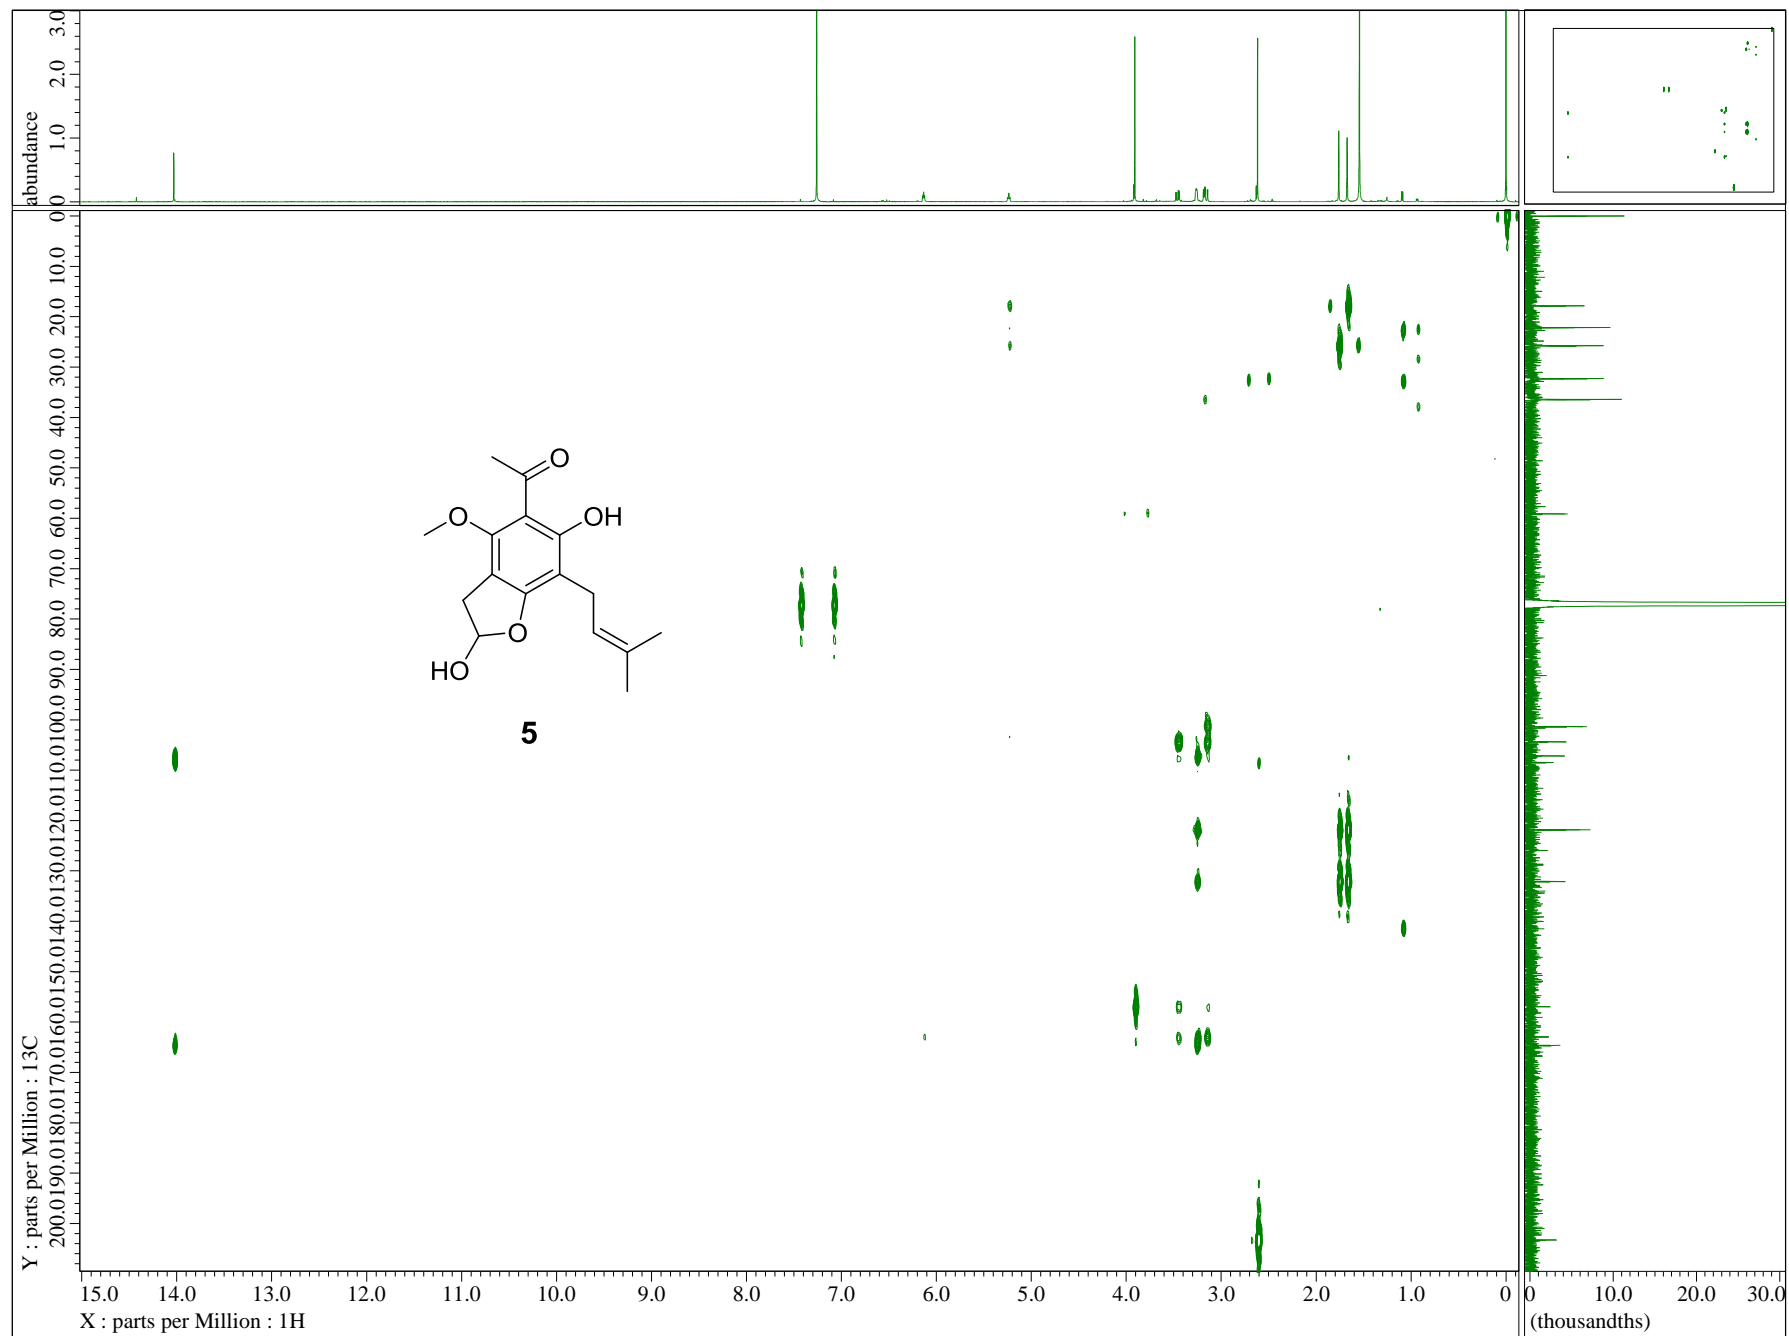

Figure S28. HMBC experiment of 5 (in CDCl<sub>3</sub>).

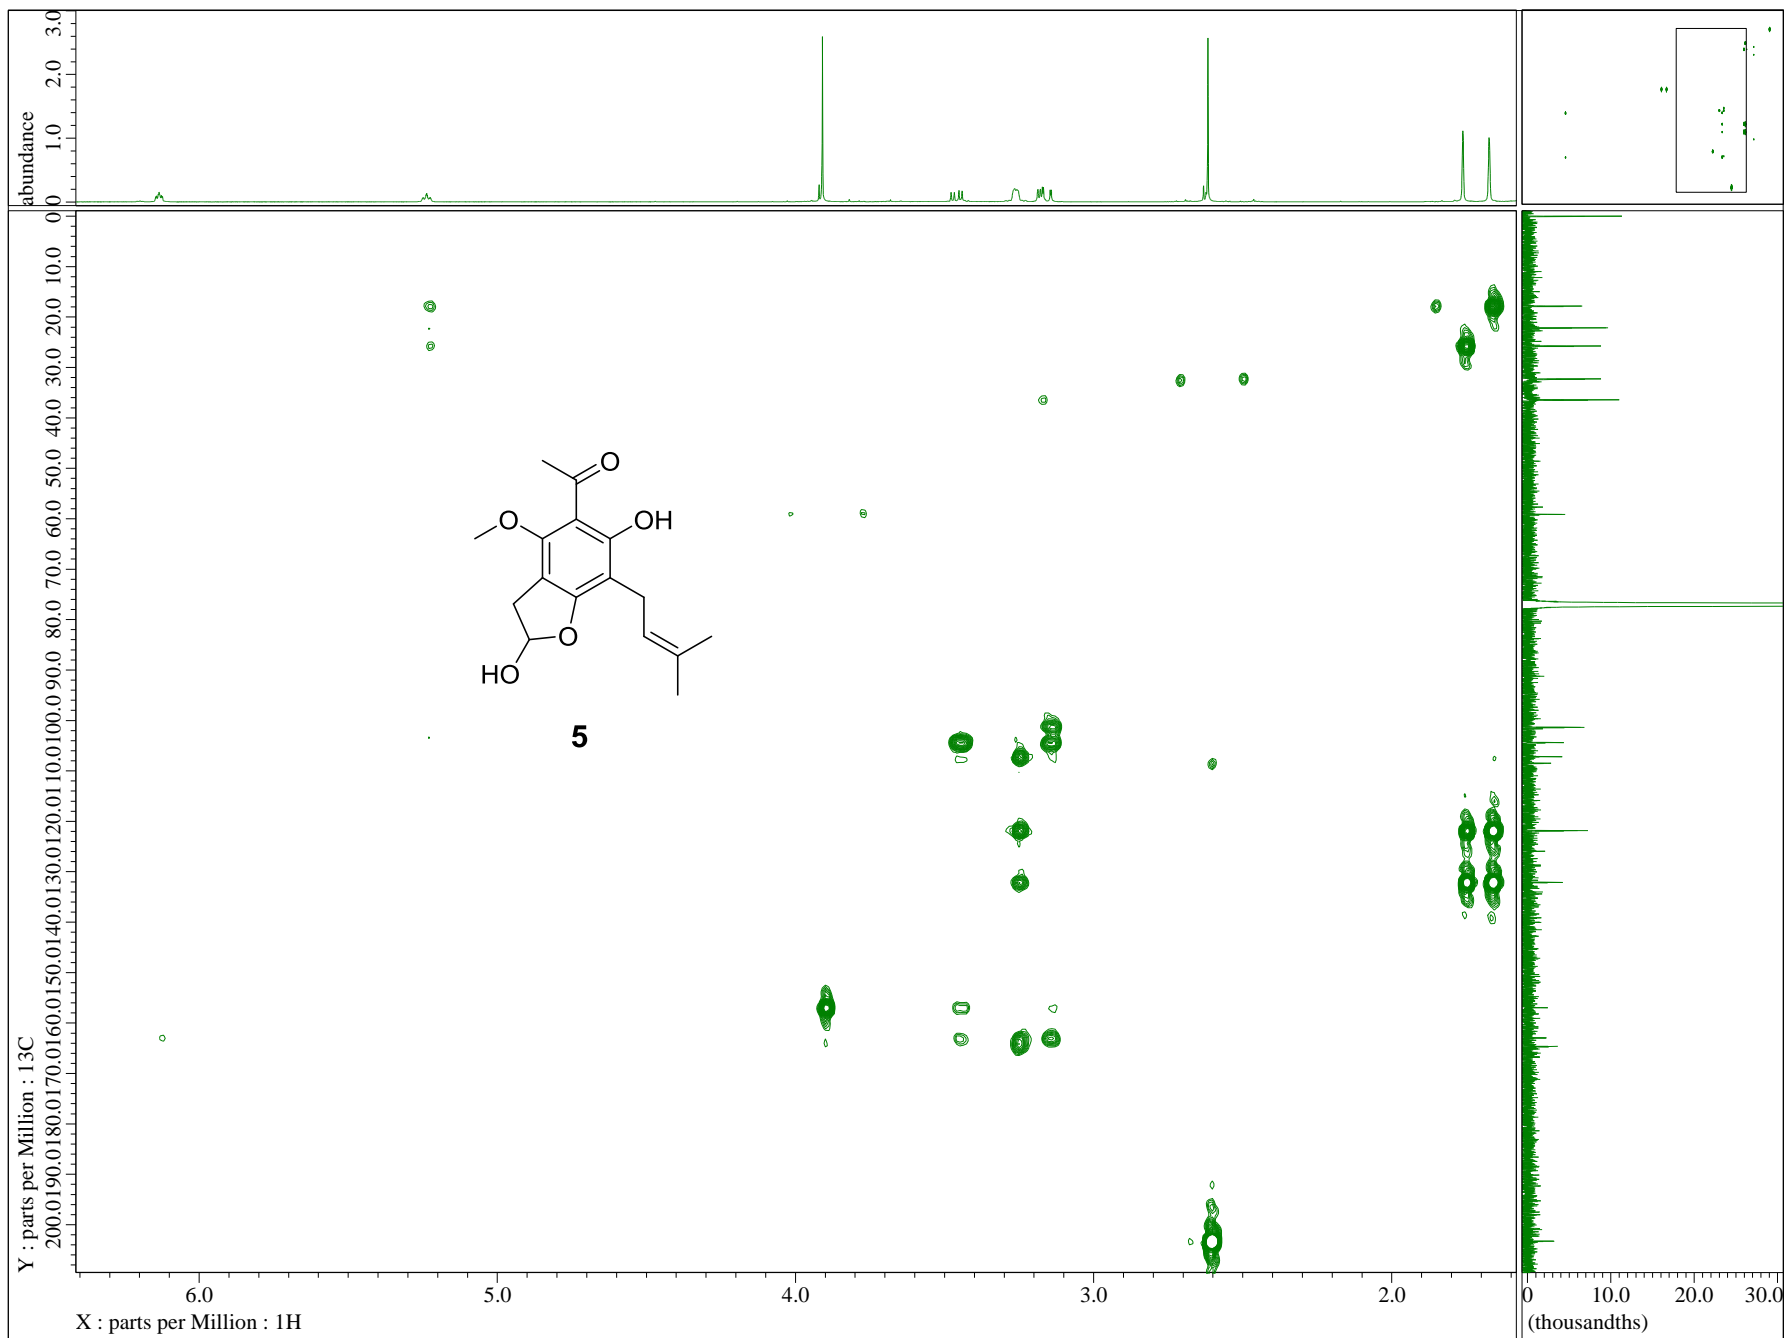

Figure S29. <sup>1</sup>H NMR spectrum of 6 (600 MHz, in CDCl<sub>3</sub>).

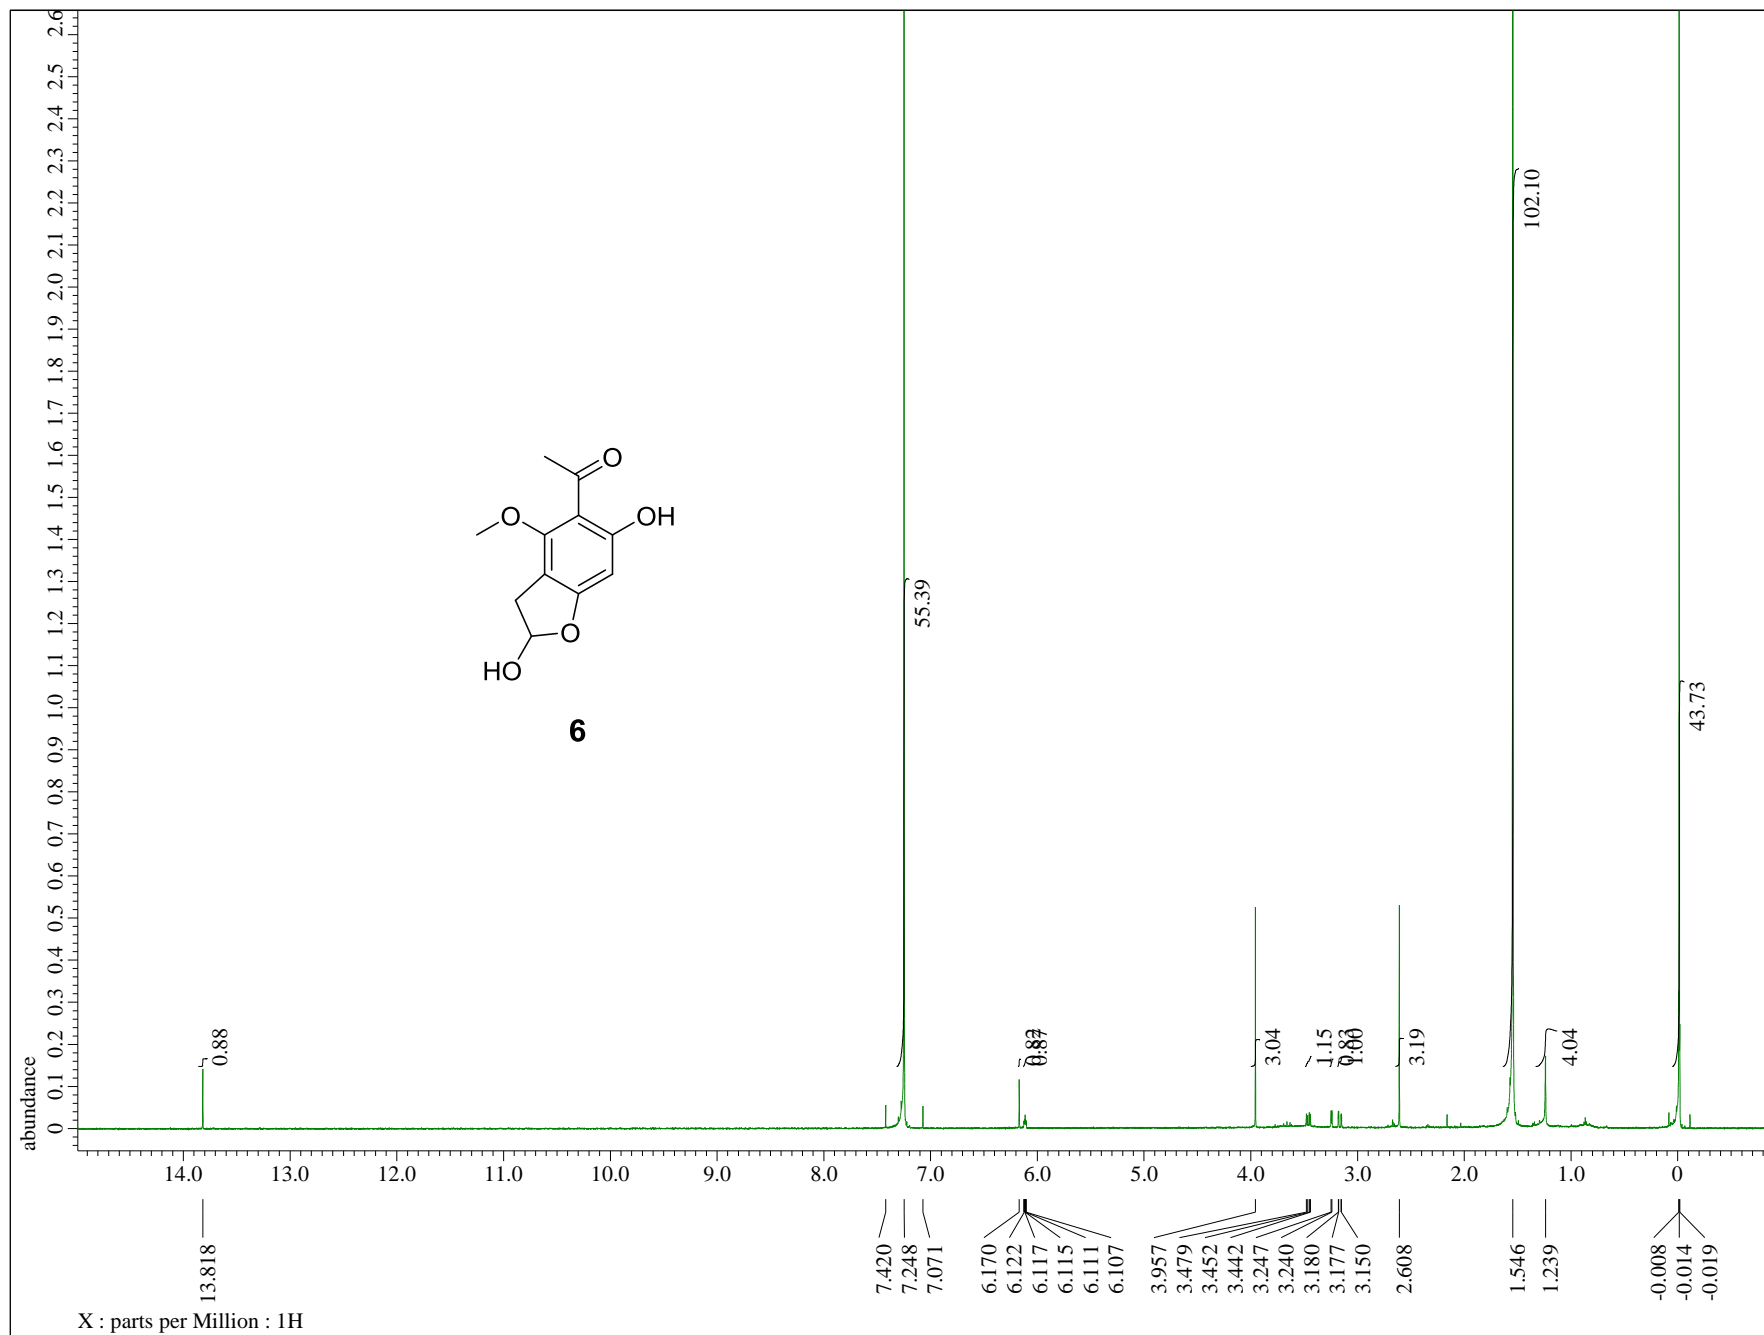



Figure S30. H-H COSY experiment of 6 (in CDCl<sub>3</sub>).

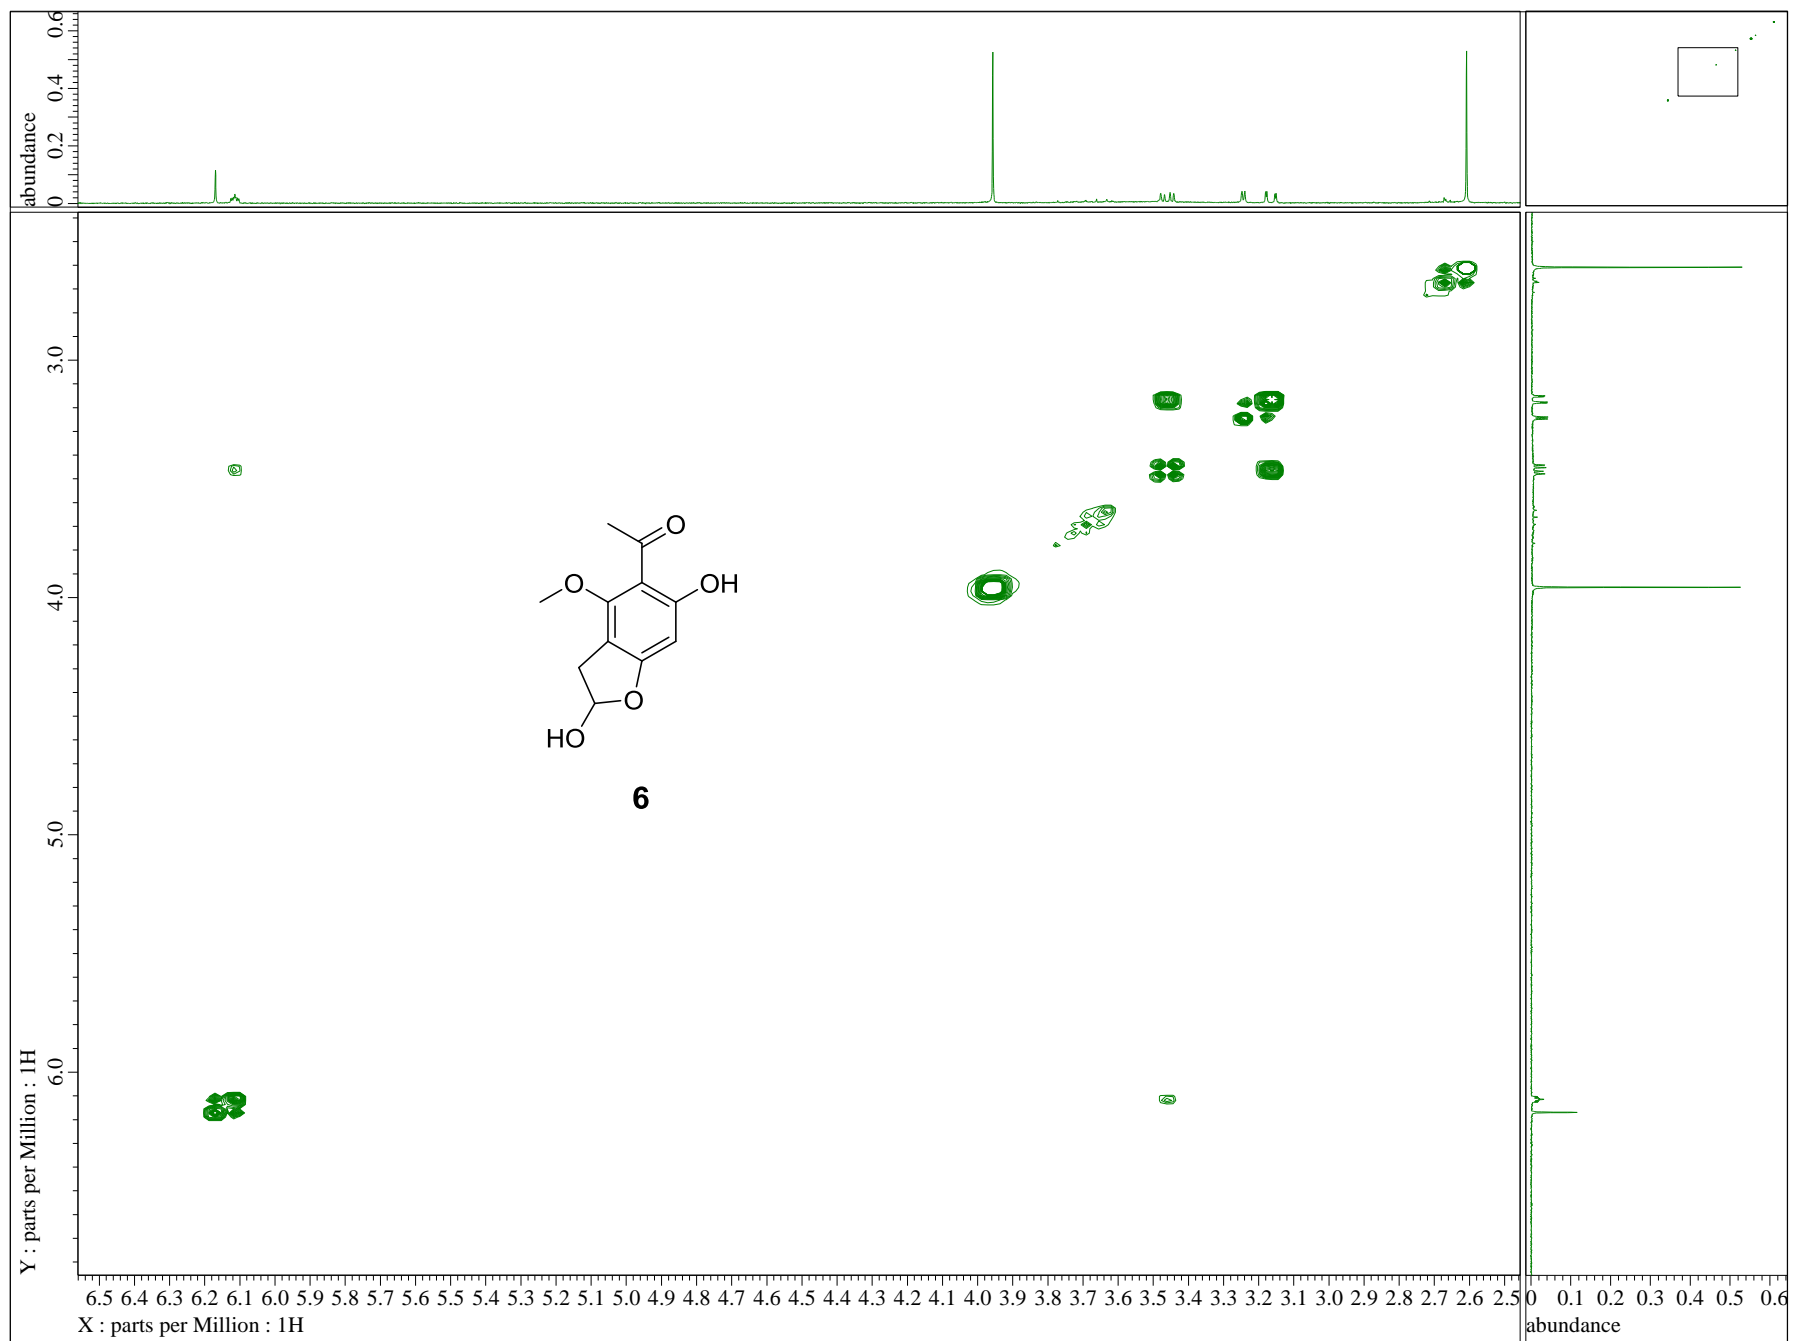

Figure S31. NOESY experiment of 6 (in CDCl<sub>3</sub>).

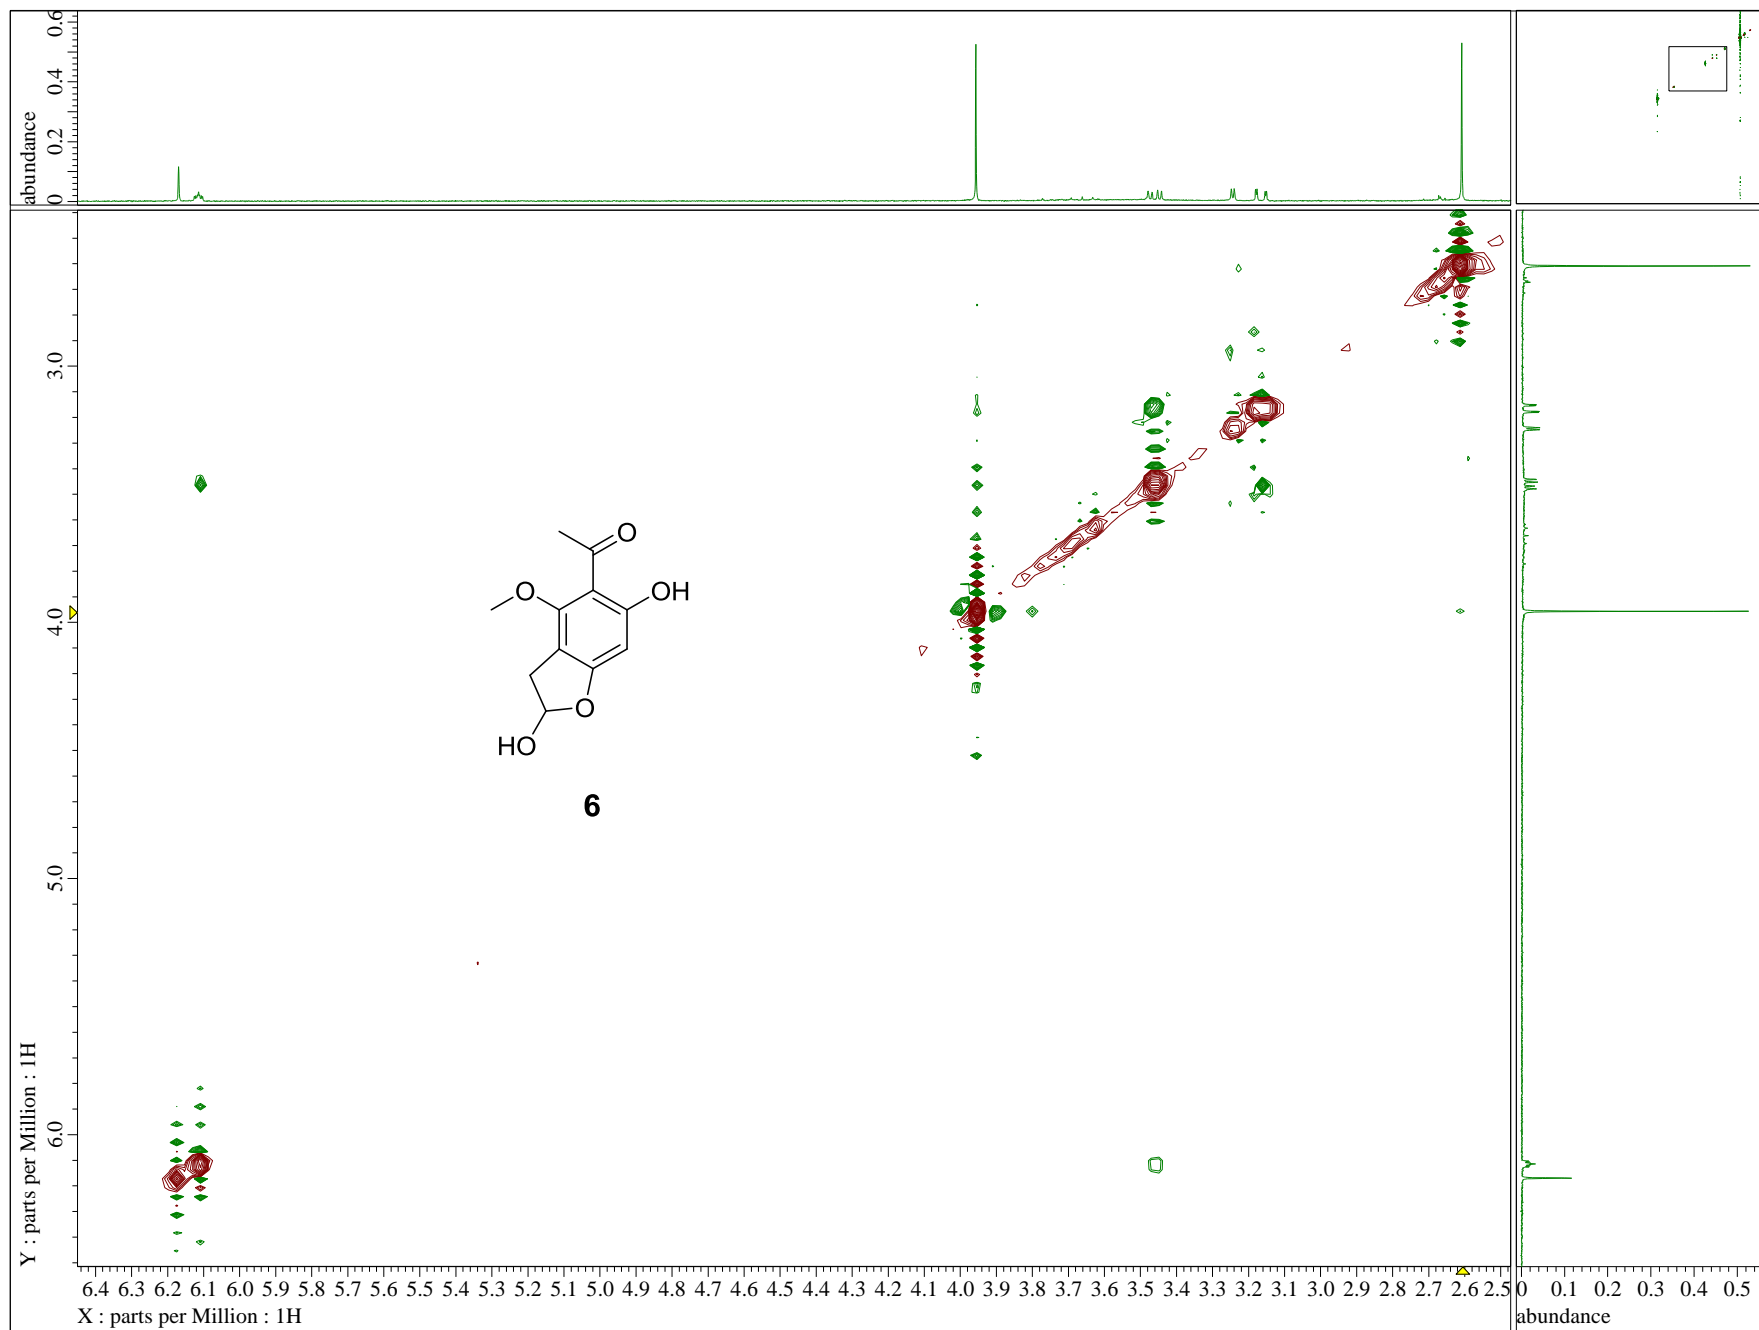

Figure S32. <sup>1</sup>H NMR spectrum of 7 (600 MHz, in CDCl<sub>3</sub>).

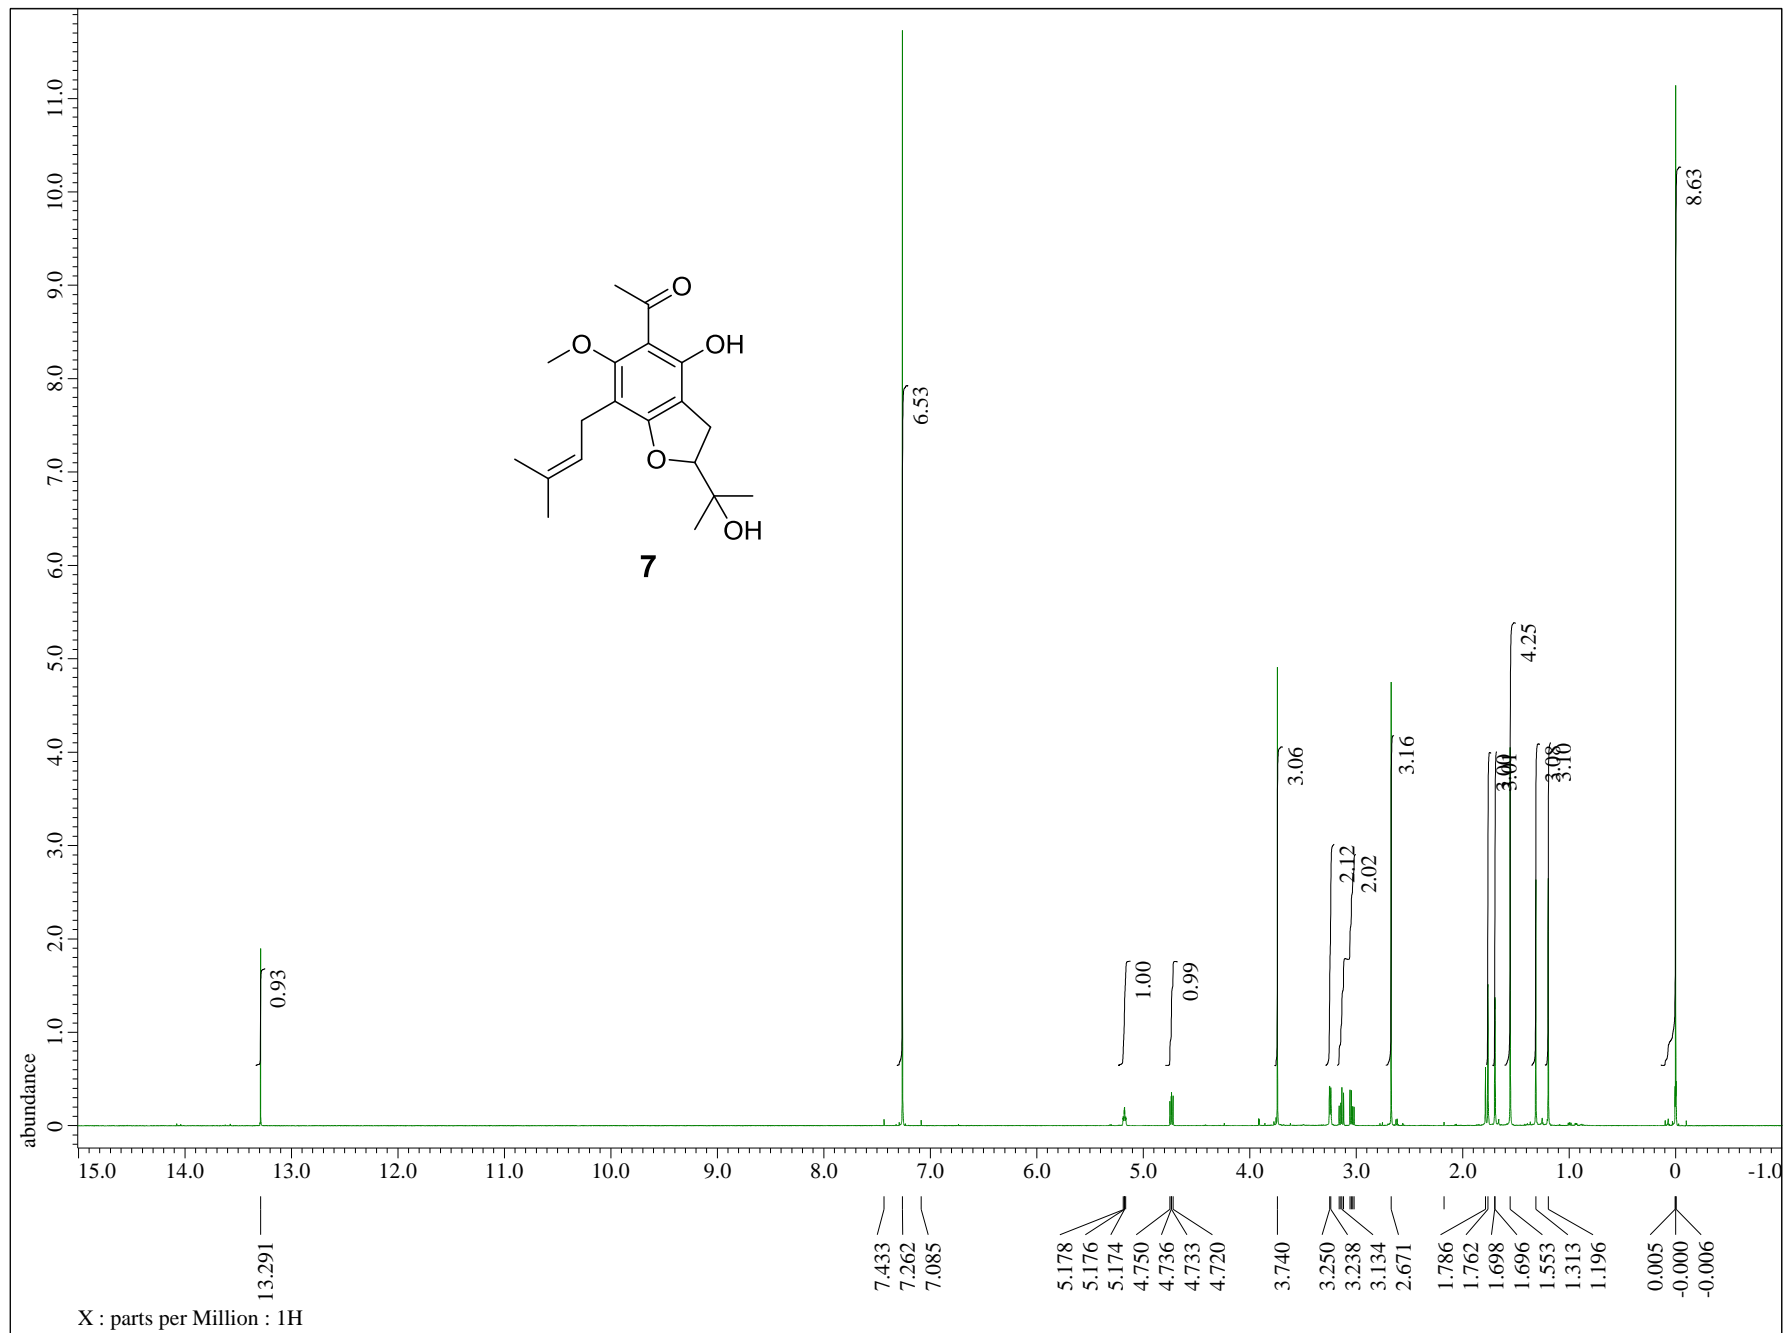

Figure S33.  $^{13}\text{C}$  NMR spectrum of **7** (150 MHz, in  $\text{CDCl}_3$ ).

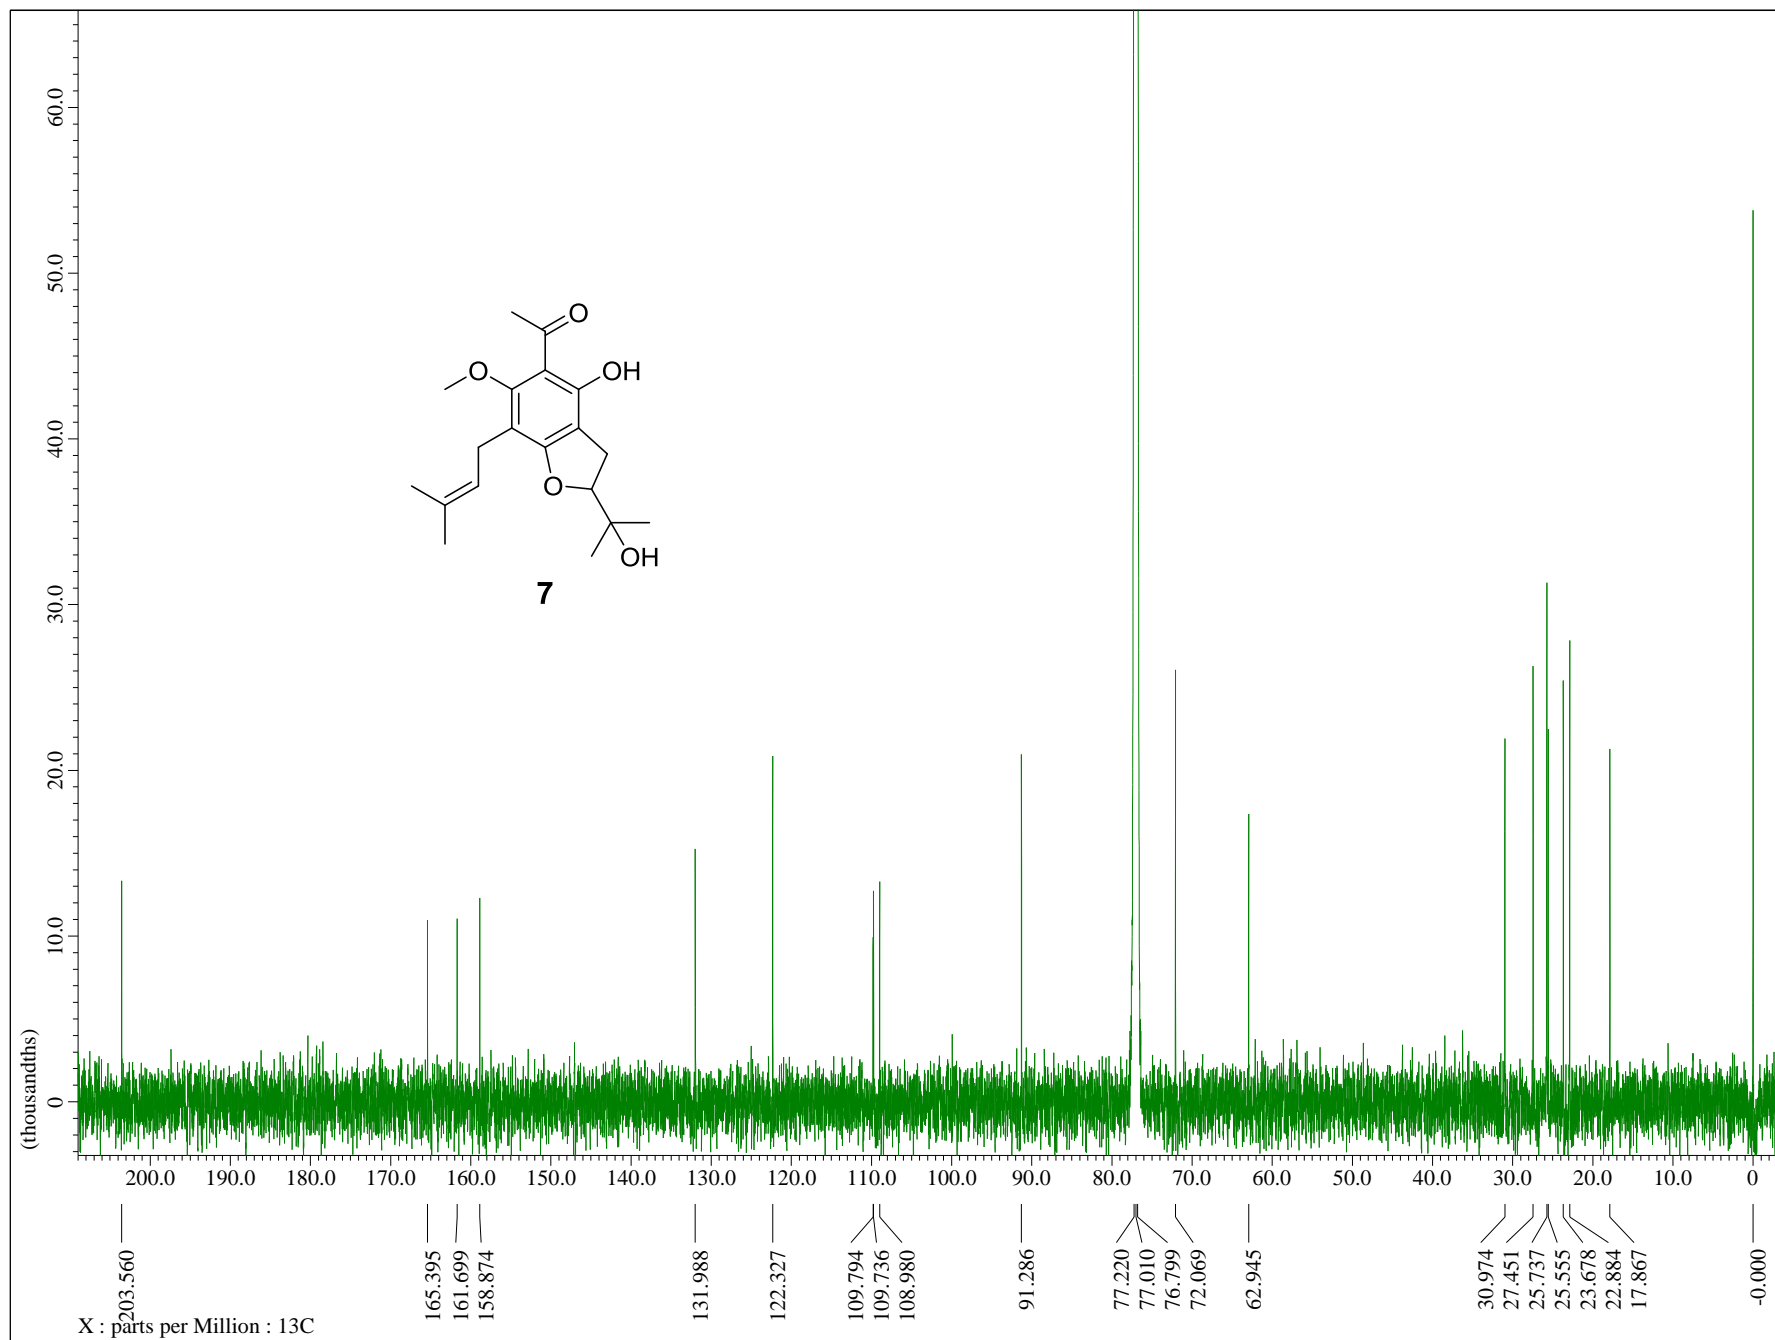

Figure S34. H-H COSY experiment of 7 (in CDCl<sub>3</sub>).

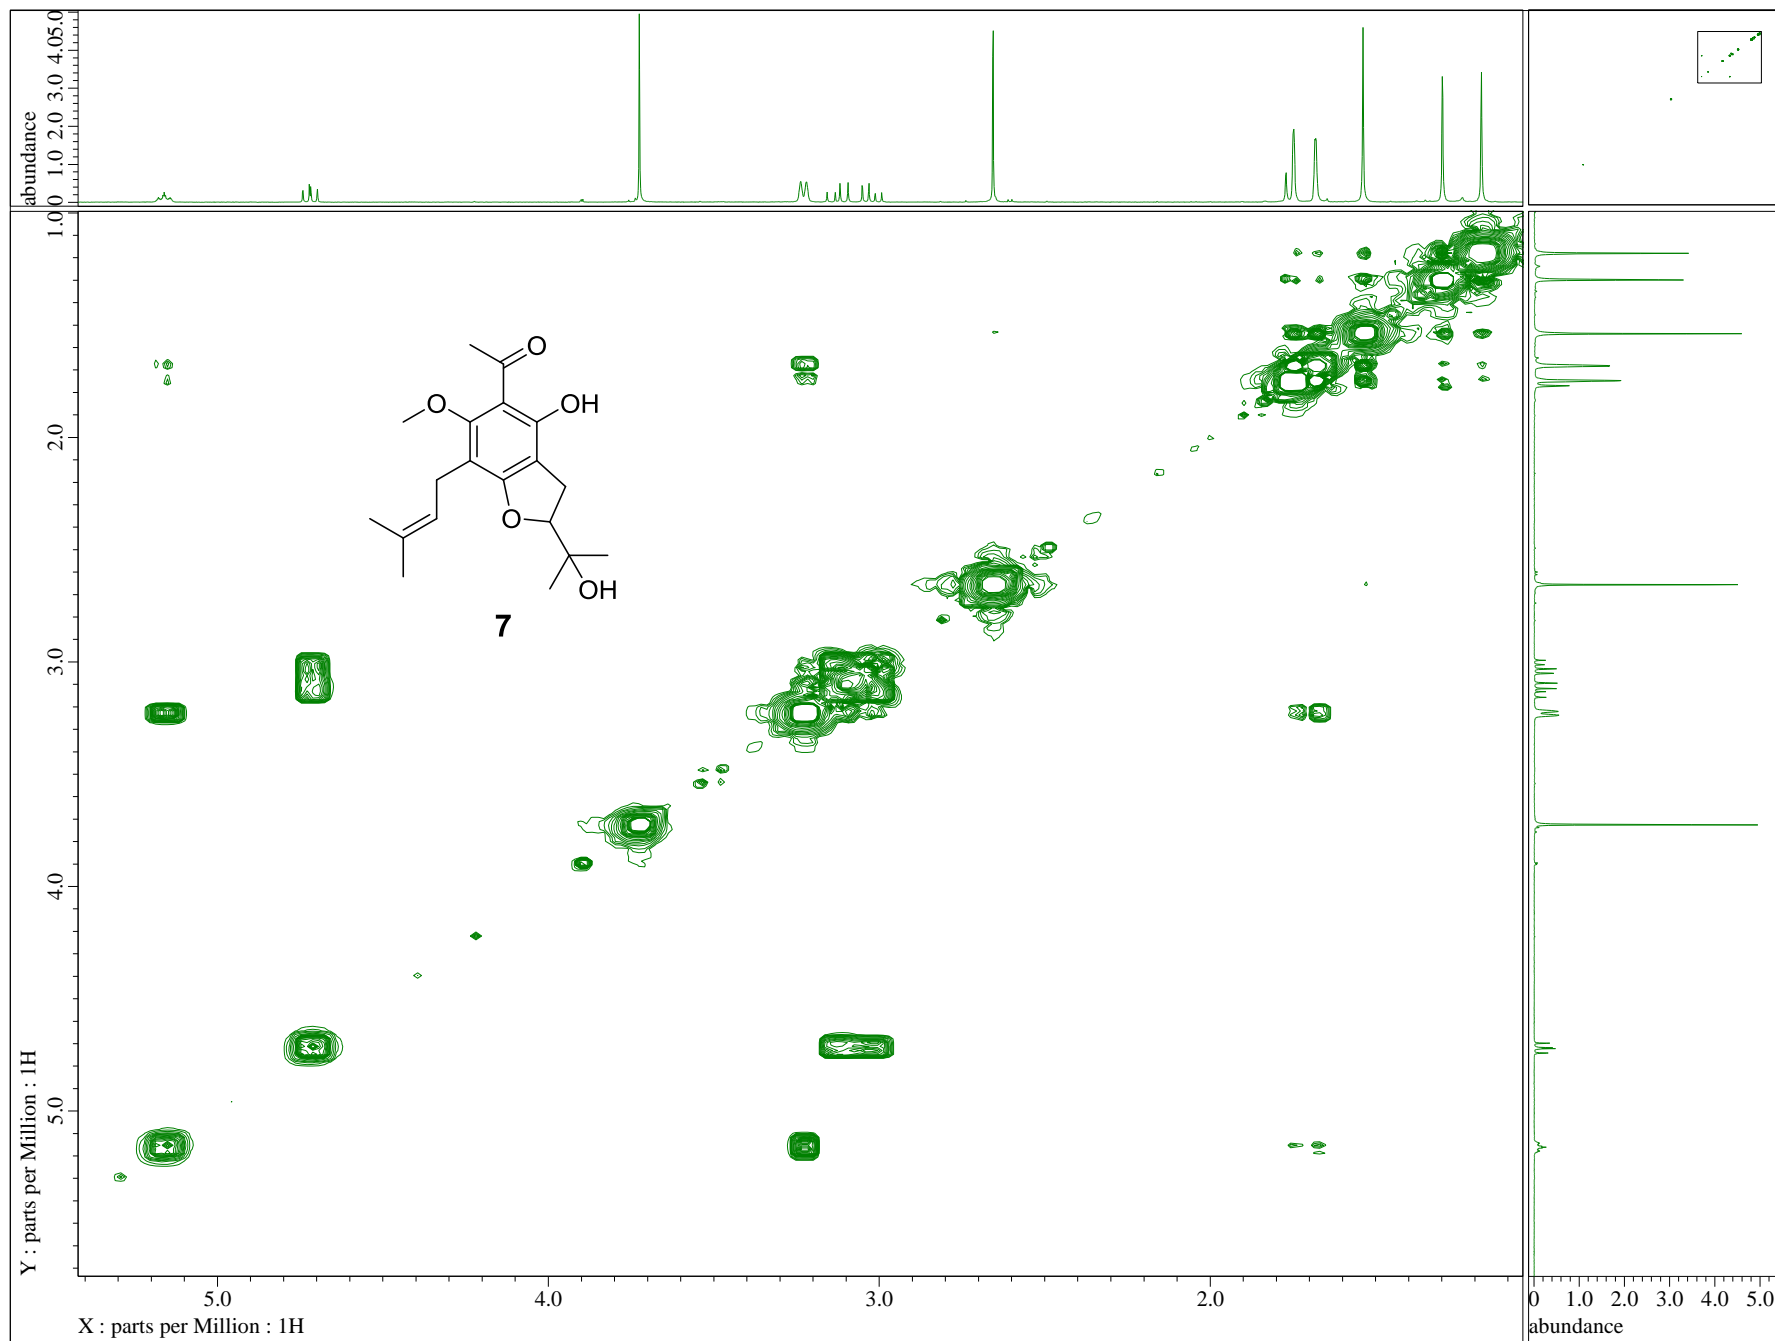

Figure S35. NOESY experiment of 7 (in CDCl<sub>3</sub>).

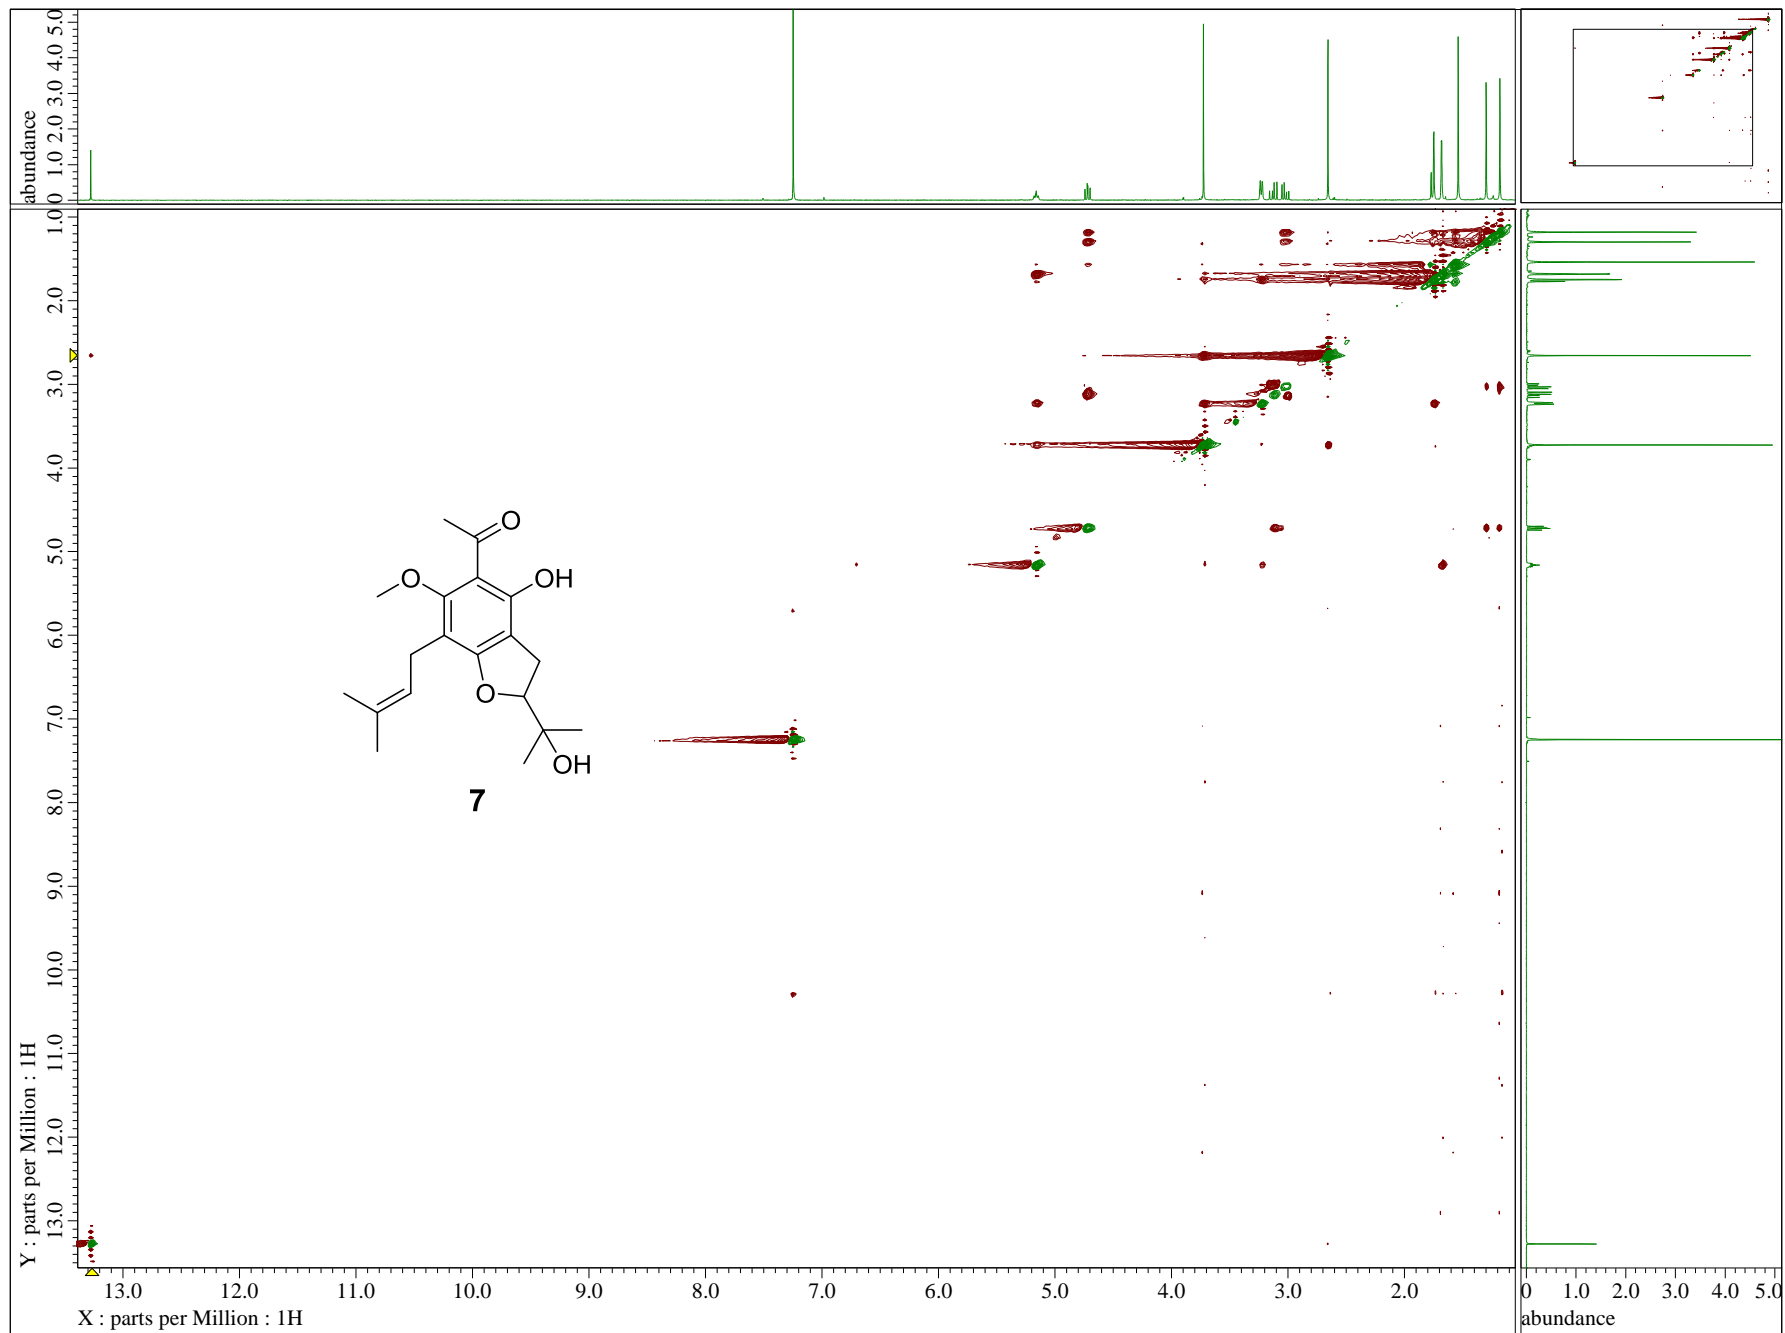

Figure S36. HMQC experiment of 7 (in CDCl<sub>3</sub>).

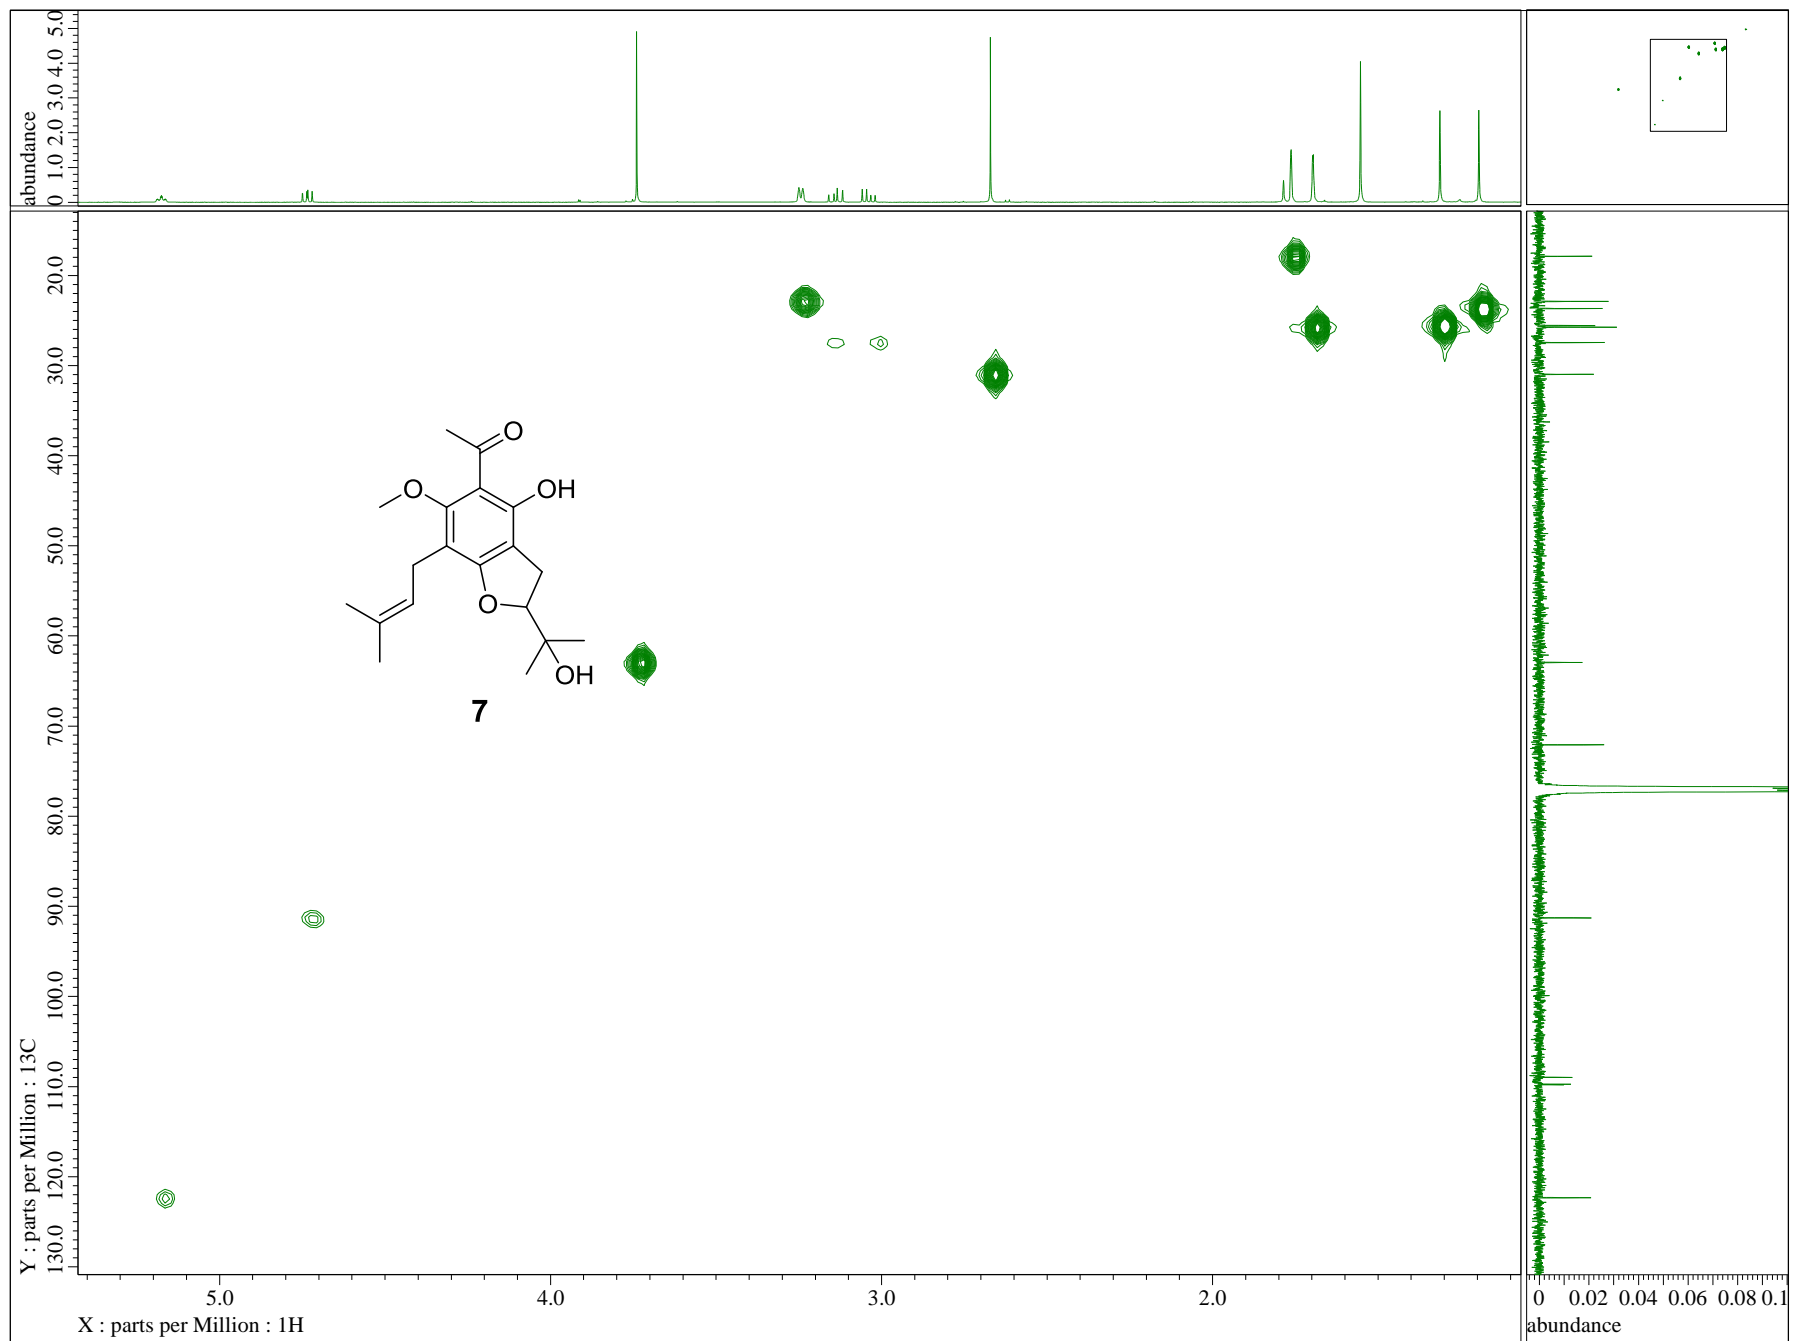

Figure S37. HMBC experiment of 7 (in CDCl<sub>3</sub>).

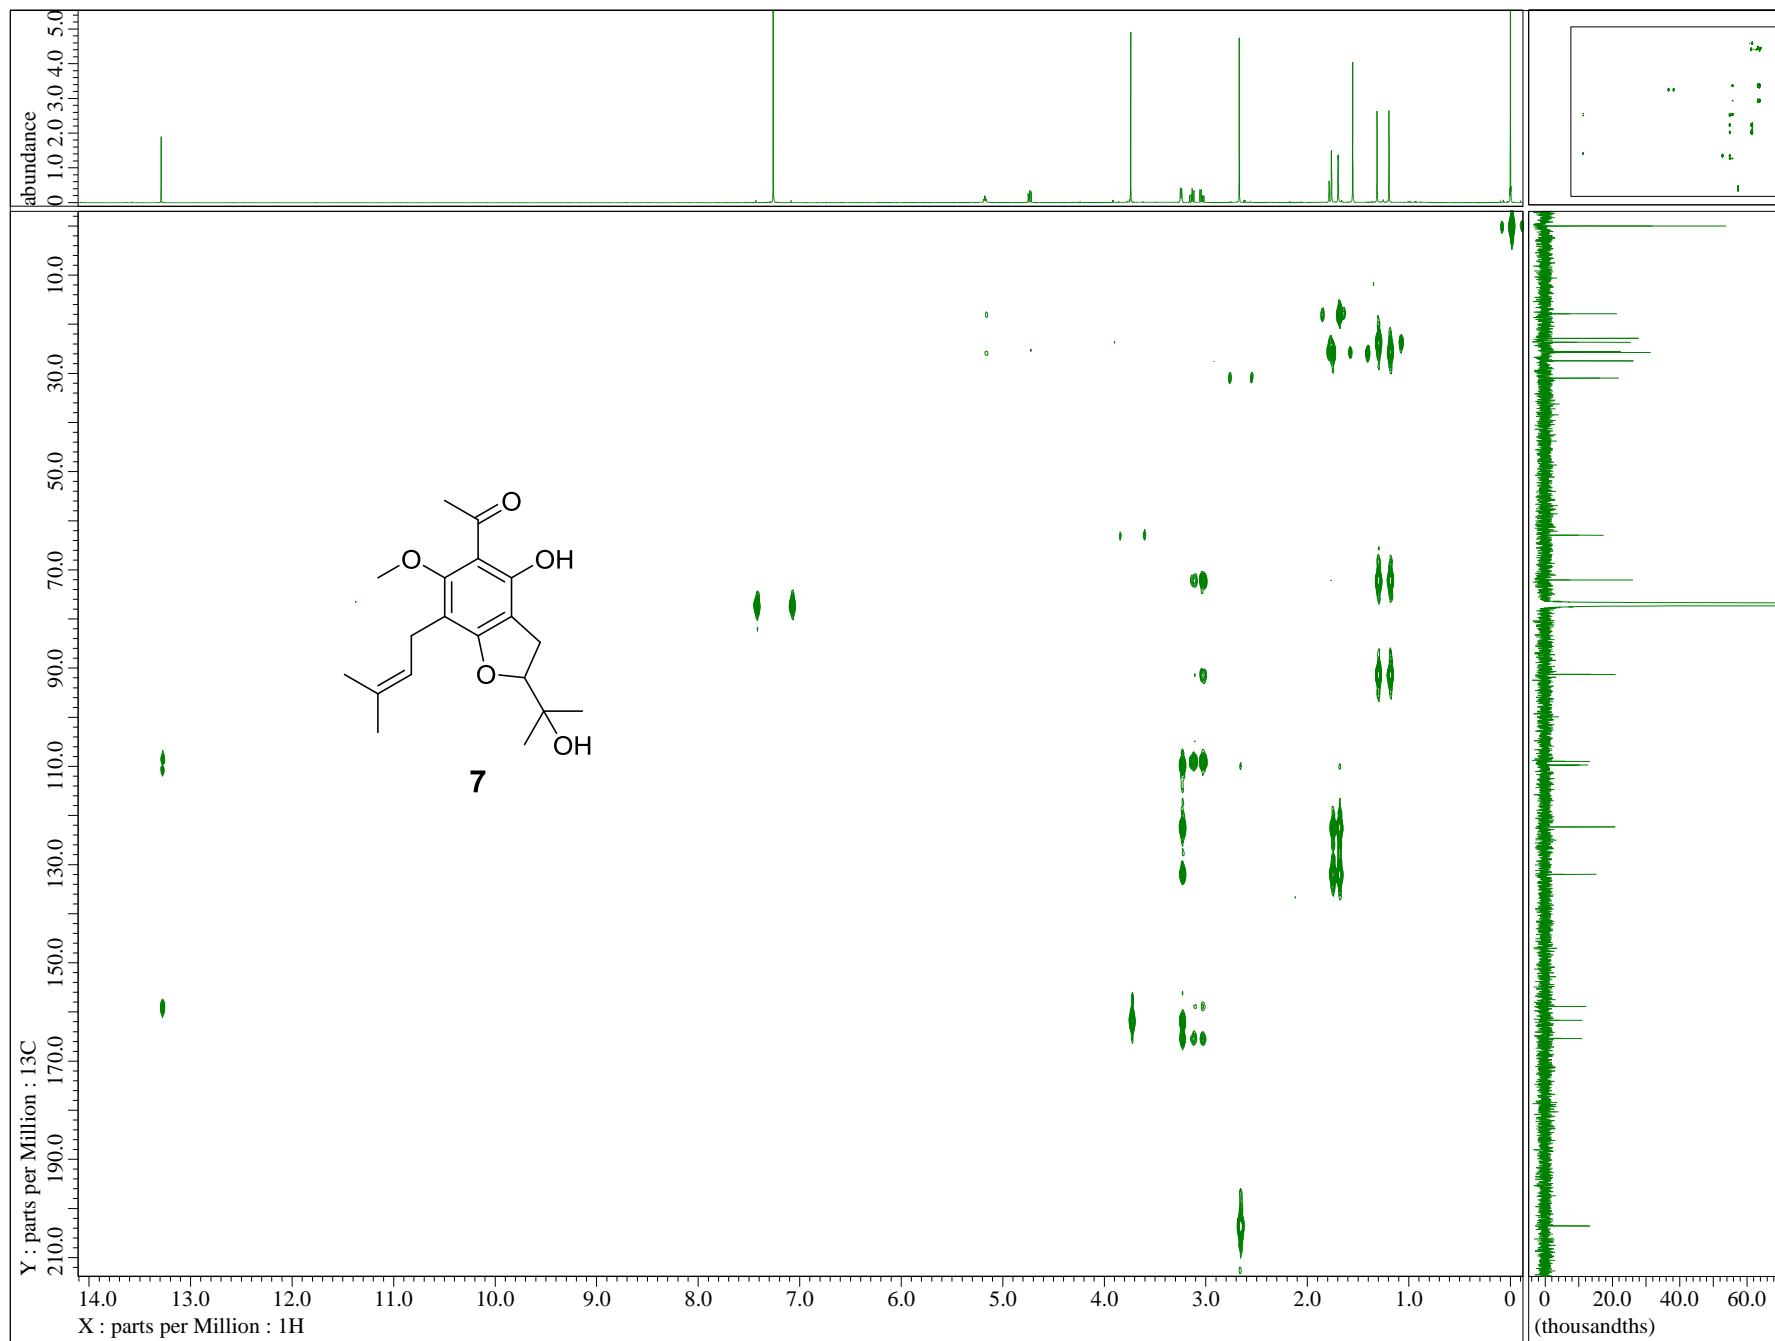



Figure S38. HMBC experiment of 7 (in CDCl<sub>3</sub>).

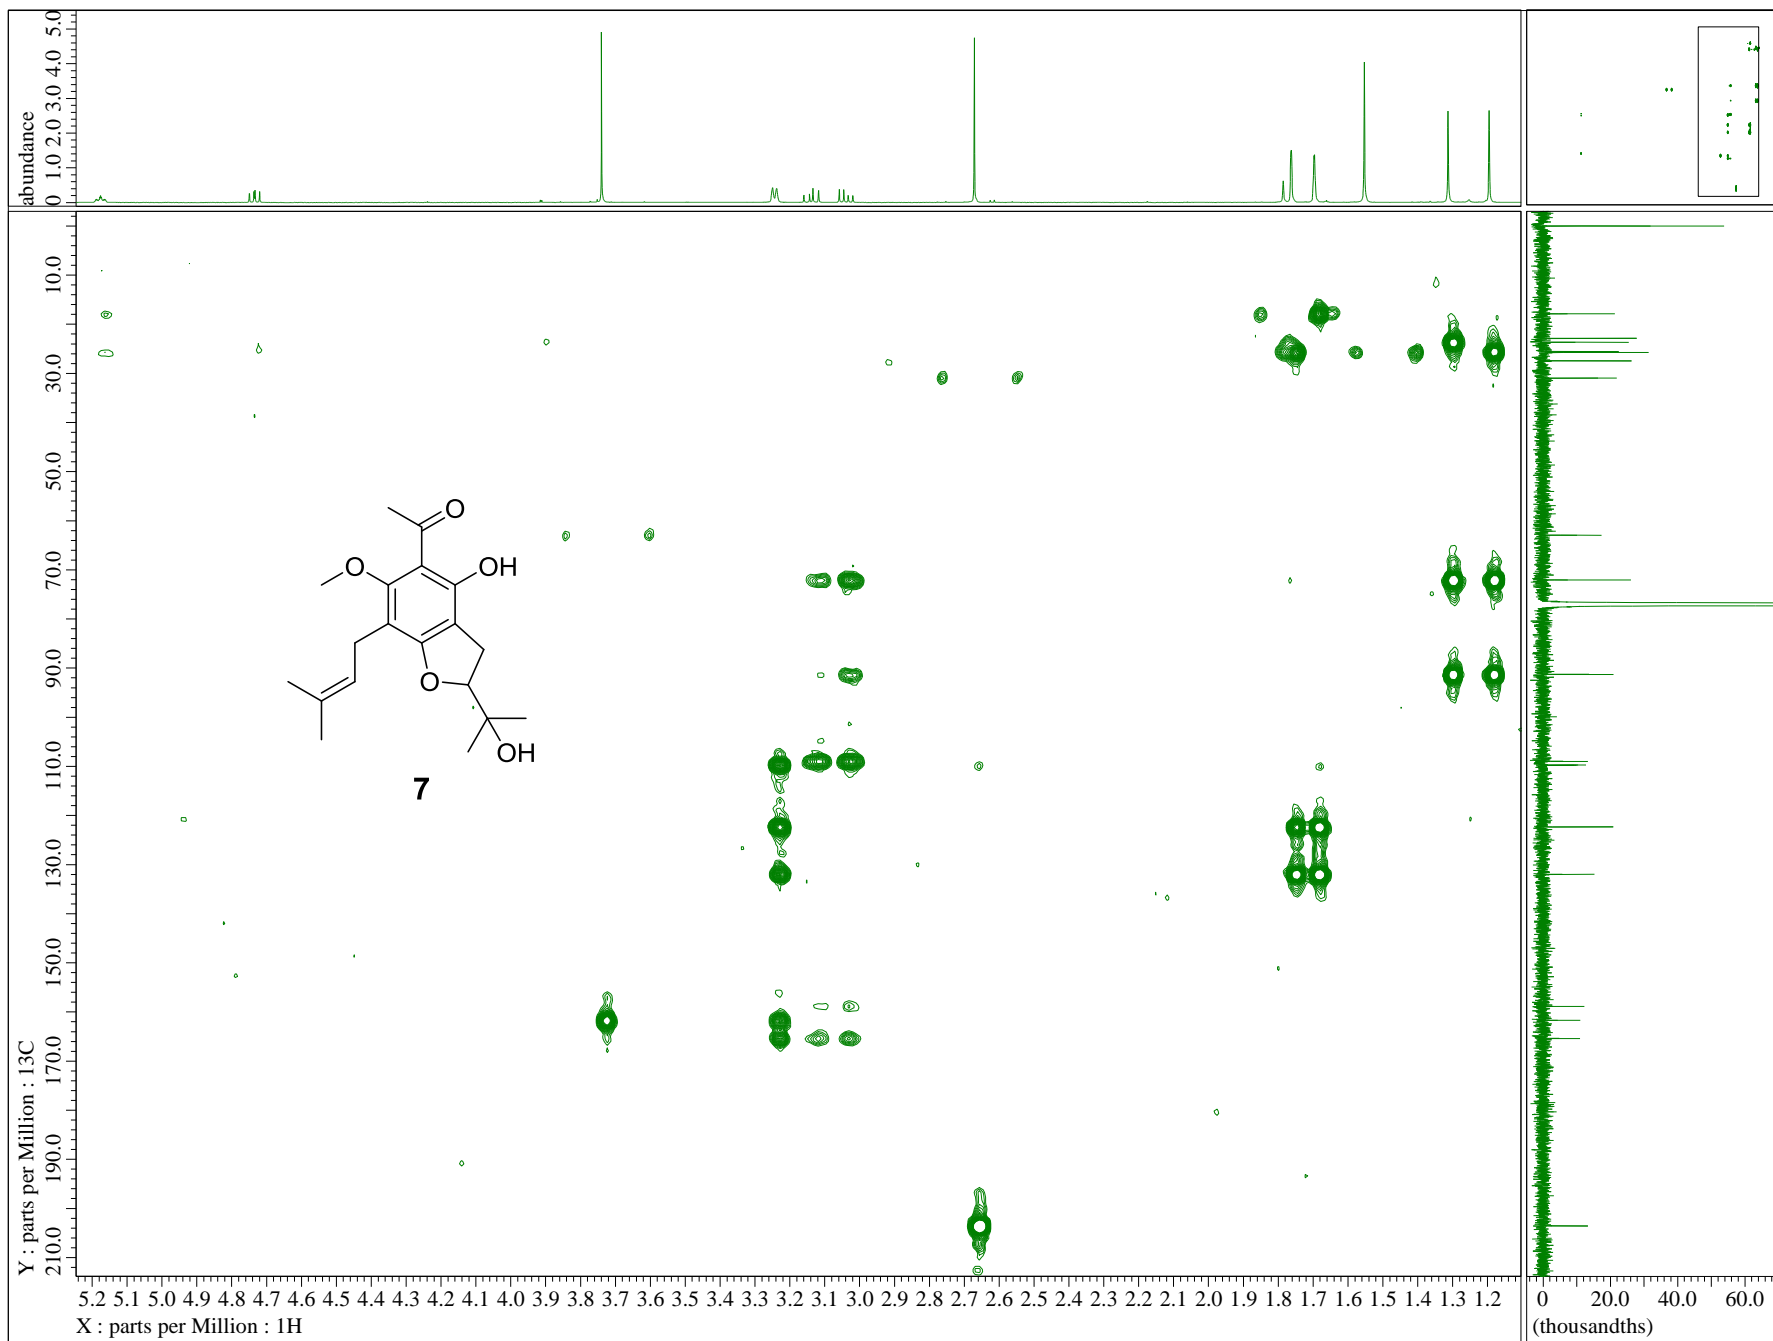

Figure S39.  $^1\text{H}$  NMR spectrum of **8** (600 MHz, in acetone- $d_6$ ).

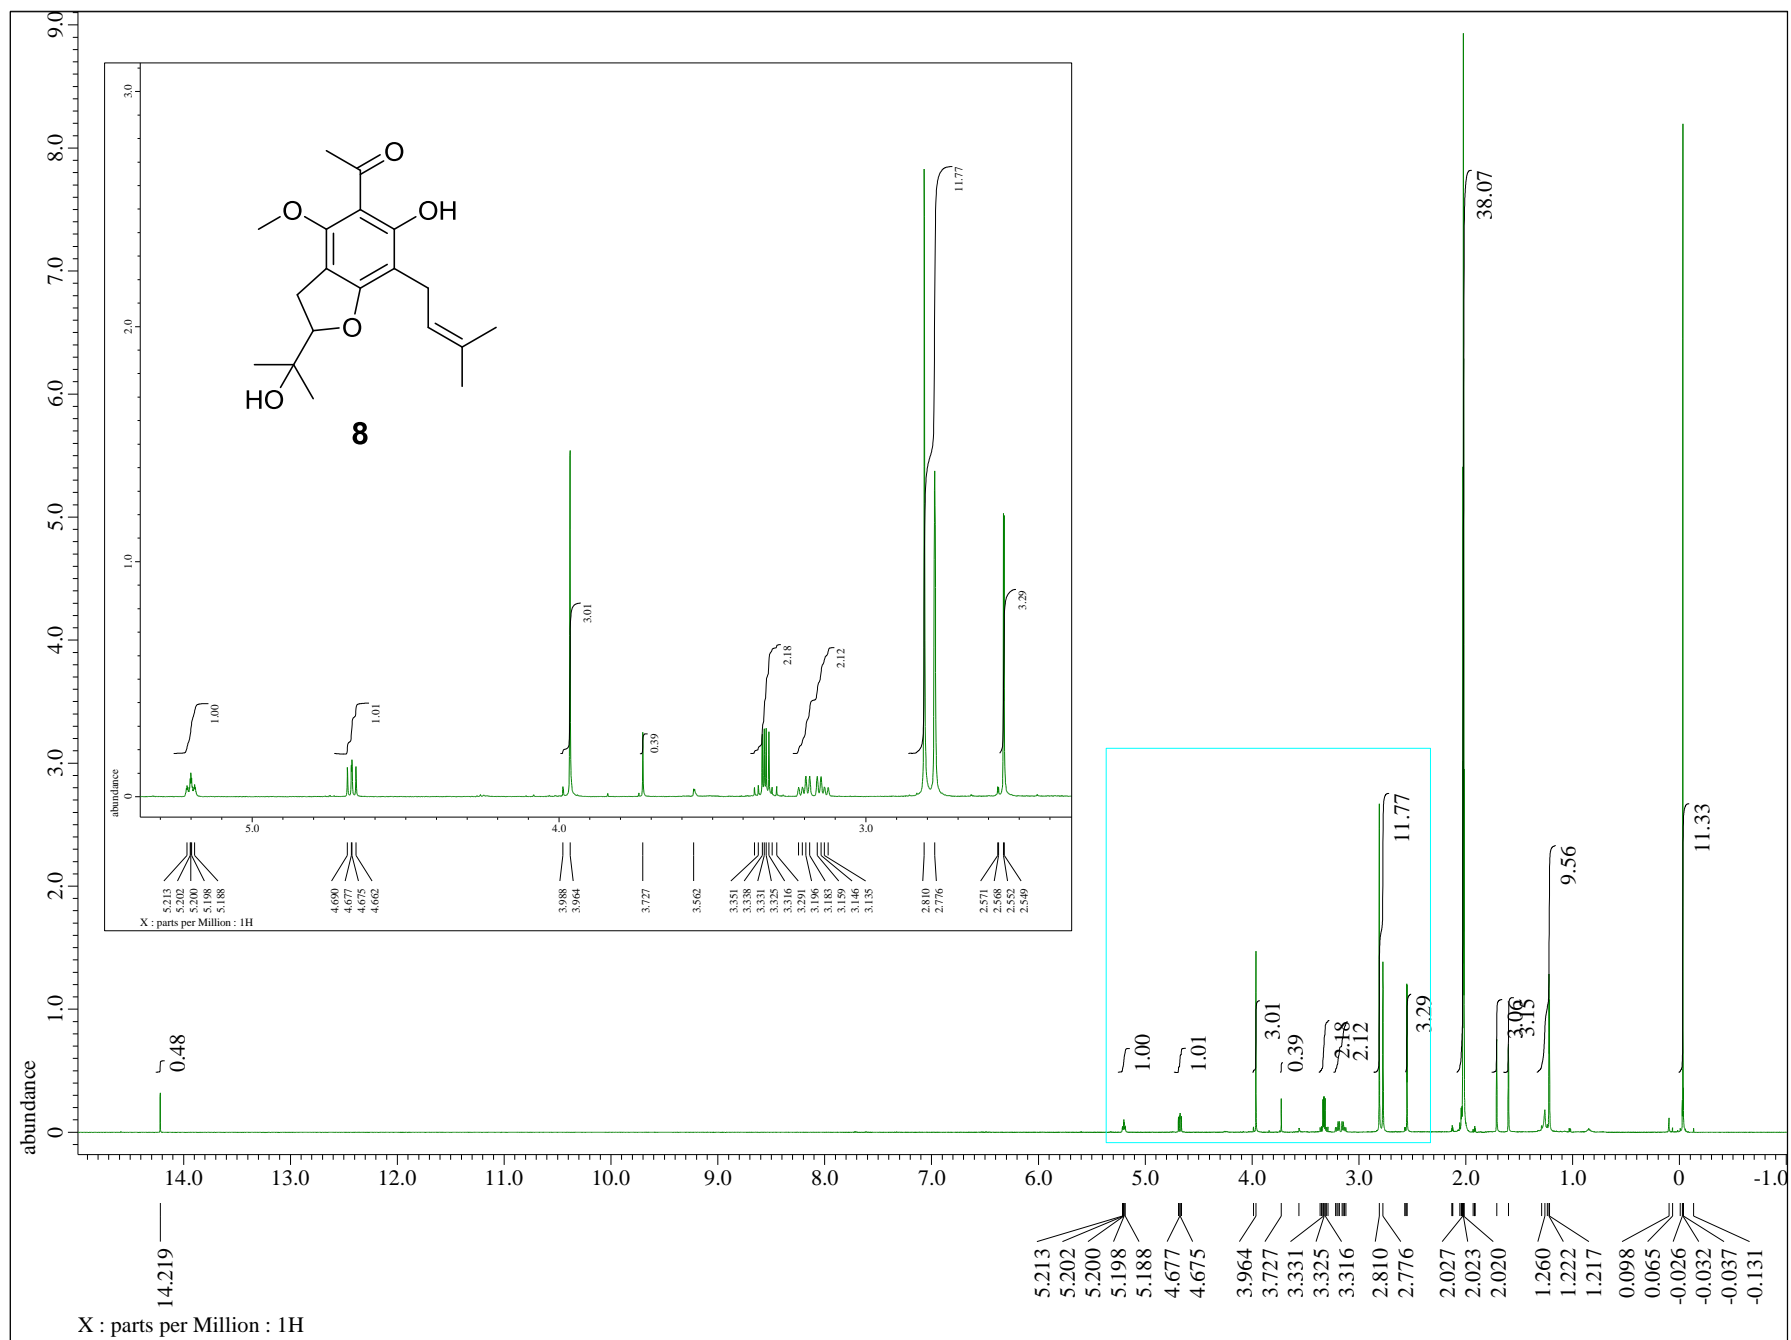

Figure S40. H-H COSY experiment of 8 (in acetone-*d*<sub>6</sub>).

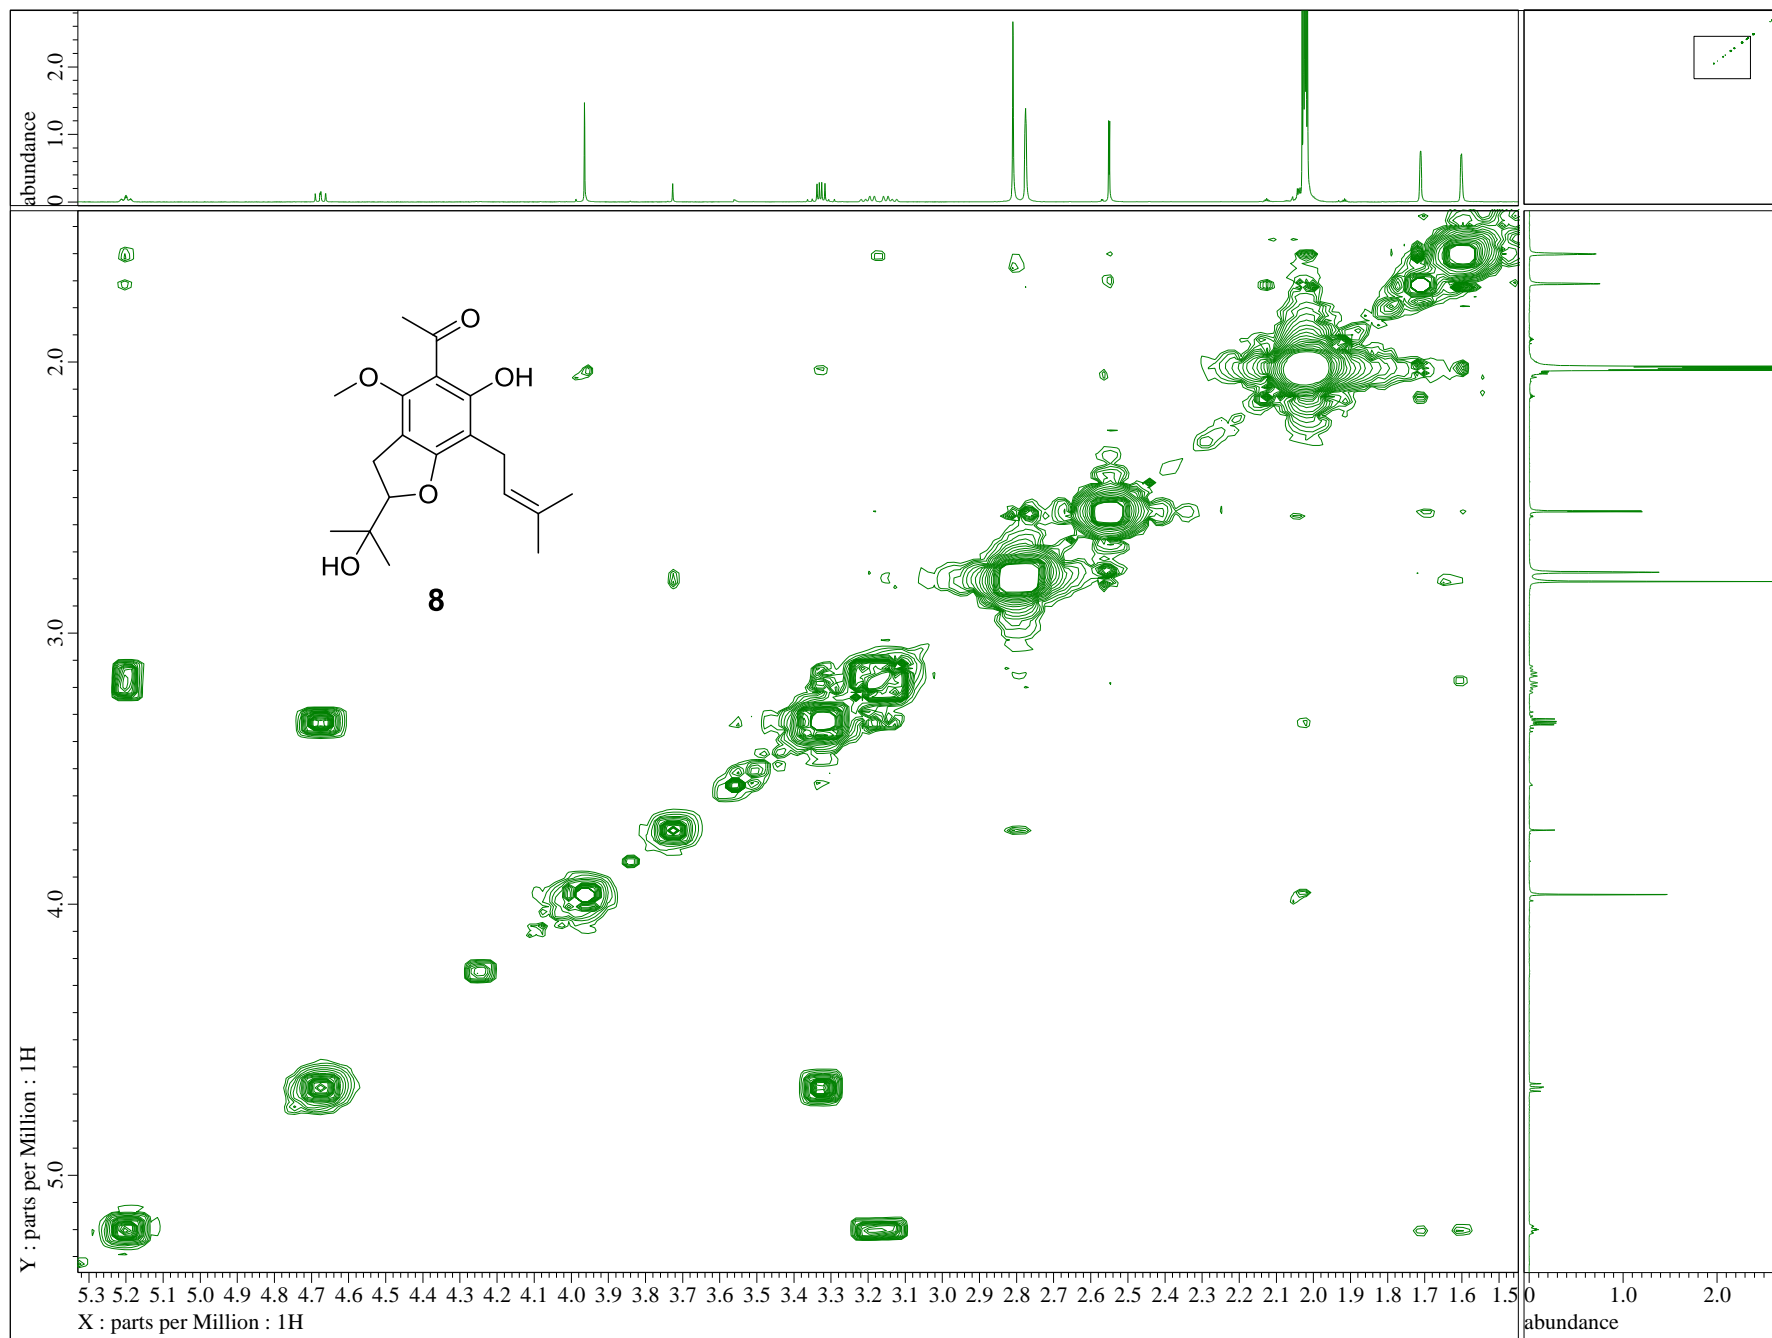

Figure S41. NOESY experiment of 8 (in acetone- $d_6$ ).

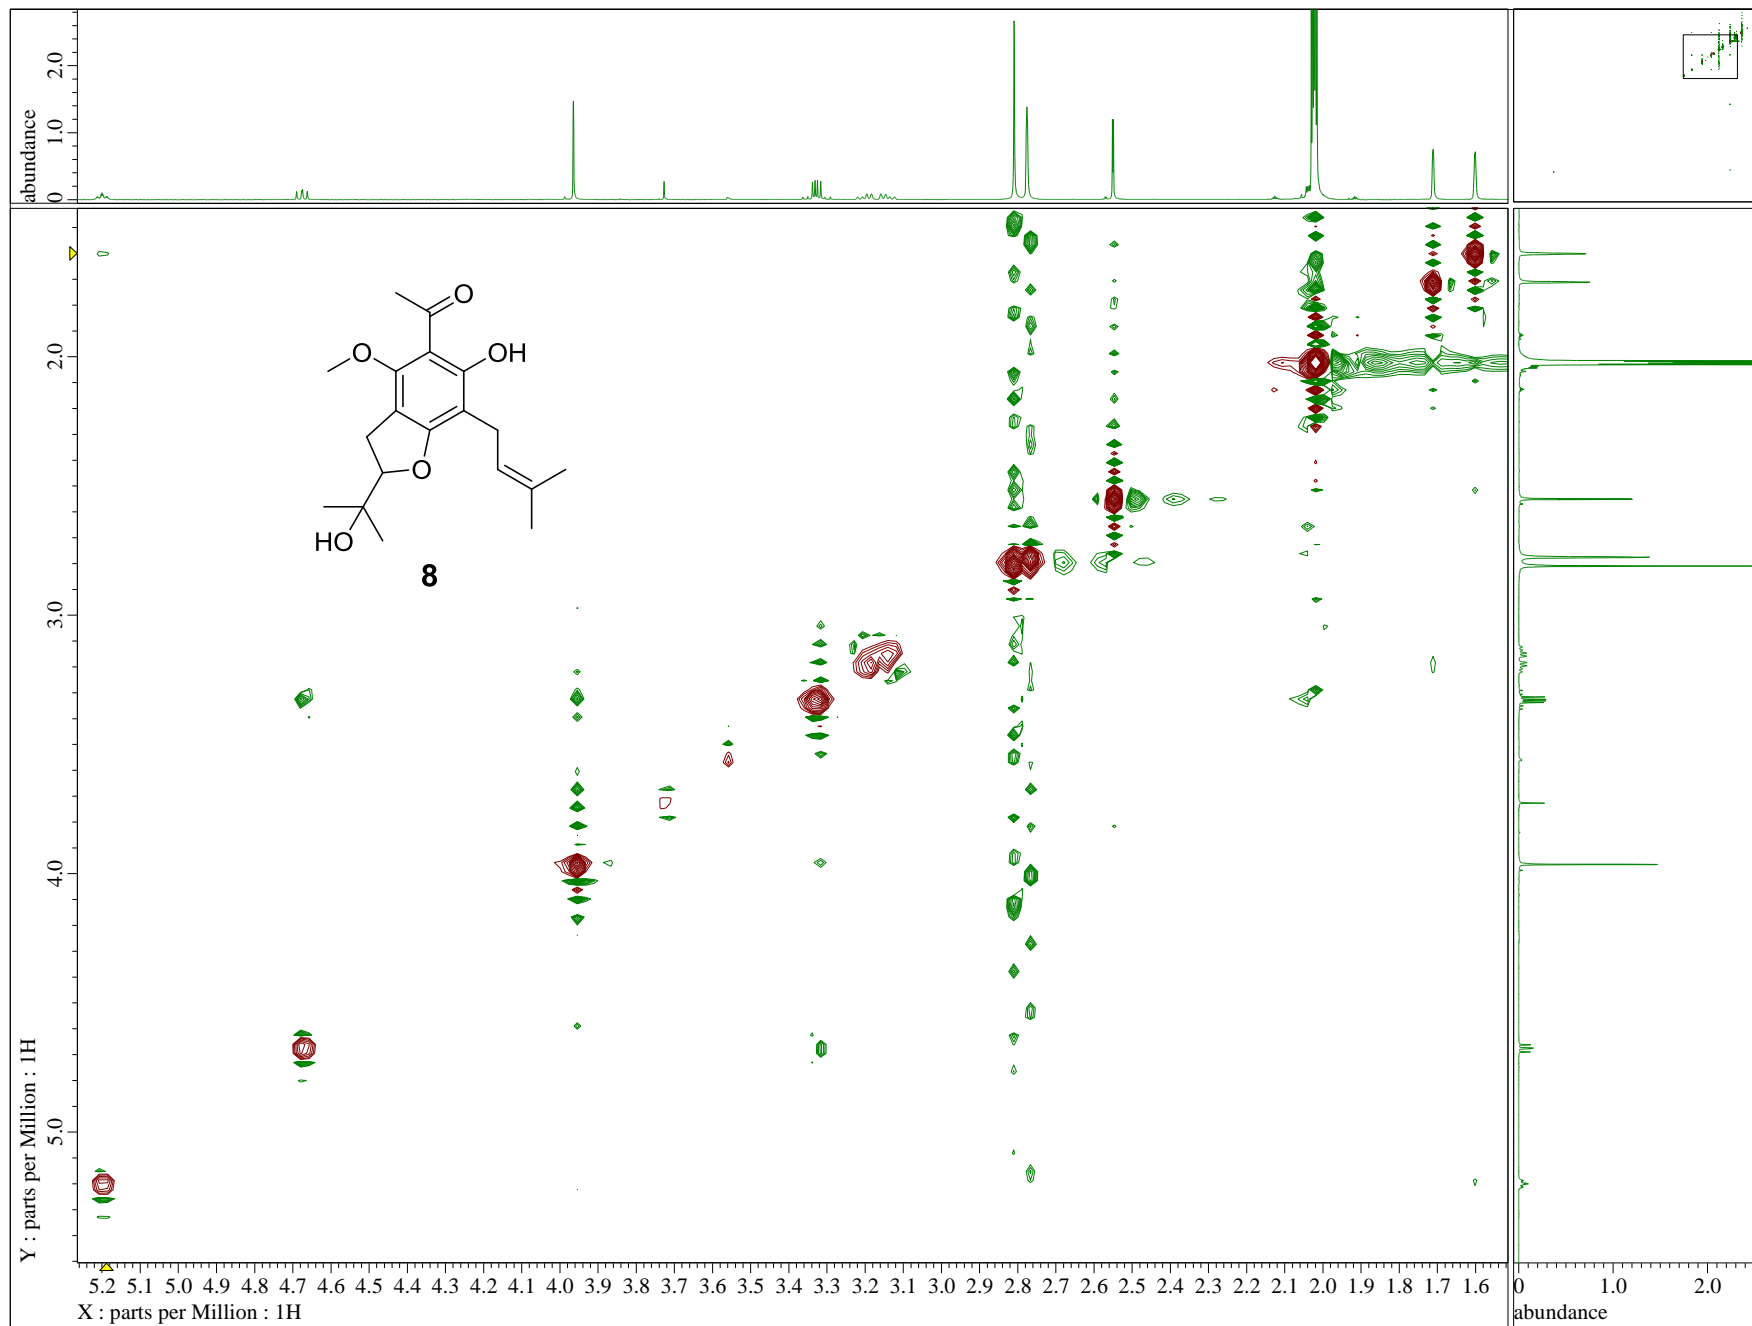

Table S42. <sup>1</sup>H and <sup>13</sup>C NMR data of 7 and 8.

|          | 7 <sup>a</sup>                   |                | 8 <sup>b</sup>                   |                | 8 <sup>a</sup>                   |       |       |                |
|----------|----------------------------------|----------------|----------------------------------|----------------|----------------------------------|-------|-------|----------------|
| solvent  | CDCl <sub>3</sub>                |                | CDCl <sub>3</sub>                |                | acetone- <i>d</i> <sub>6</sub>   |       |       |                |
| position | δ <sub>H</sub> ( <i>J</i> in Hz) |                | δ <sub>H</sub> ( <i>J</i> in Hz) |                | δ <sub>H</sub> ( <i>J</i> in Hz) |       |       |                |
|          |                                  | δ <sub>C</sub> |                                  | δ <sub>C</sub> |                                  |       |       |                |
| 1        |                                  | 203.6          |                                  | 203.0          |                                  |       |       |                |
| 2        | 2.67                             | s              | 31.0                             | 2.61           | s                                | 32.1  | 2.55  | s              |
| 1'       |                                  | 109.8          |                                  | 106.5          |                                  |       |       |                |
| 2'       |                                  | 158.9          |                                  | 164.7          |                                  |       |       |                |
| 3'       |                                  | 109.0          |                                  | 108.2          |                                  |       |       |                |
| 4'       |                                  | 165.4          |                                  | 164.8          |                                  |       |       |                |
| 5'       |                                  | 109.7          |                                  | 107.1          |                                  |       |       |                |
| 6'       |                                  | 161.7          |                                  | 156.7          |                                  |       |       |                |
| 1''      | 3.25                             | brd (6.4)      | 22.9                             | 3.26           | d (8.0)                          | 22.1  | 3.31  | dd (15.0, 9.0) |
|          |                                  |                |                                  |                |                                  |       | 3.34  | dd (15.0, 7.2) |
| 2''      | 5.18                             | brt (7.6)      | 122.3                            | 4.64           | t (8.0)                          | 90.1  | 4.68  | dd (9.0, 7.8)  |
| 3''      |                                  |                | 132.0                            |                |                                  | 71.8  |       |                |
| 4''      | 1.70                             | brs            | 25.7                             | 1.24           | s                                | 25.7  | 1.217 | s              |
| 5''      | 1.76                             | brs            | 17.9                             | 1.36           | s                                | 25.8  | 1.222 | s              |
| 1'''     | 3.04                             | dd (15.6, 8.0) | 27.5                             | 3.22           | d (6.6)                          | 28.9  | 3.14  | dd (14.4, 7.8) |
|          |                                  |                |                                  |                |                                  |       | 3.20  | dd (14.4, 7.8) |
| 2'''     | 4.74                             | t (10.0)       | 91.3                             | 5.24           | t (6.6)                          | 121.9 | 5.20  | t (7.5)        |
| 3'''     |                                  |                | 72.1                             |                |                                  | 131.7 |       |                |
| 4'''     | 1.20                             | s              | 23.7                             | 1.67           | s                                | 25.7  | 1.60  | brs            |
| 5'''     | 1.31                             | s              | 25.6                             | 1.76           | s                                | 17.8  | 1.71  | brs            |
| MeO      | 3.74                             | s              | 62.9                             | 3.90           | s                                | 59.1  | 3.96  | s              |
| OH       | 13.30                            | s              |                                  | 14.52          | s                                |       | 14.21 | s              |

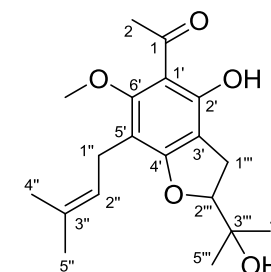

7

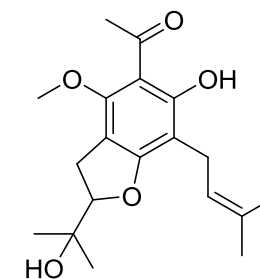

8

<sup>a</sup> Measured at 600 MHz for <sup>1</sup>H NMR and 150 MHz for <sup>13</sup>C NMR. <sup>b</sup> Ref. 3.

### Figure S43. HRFABMS data of 1.

Data : 分子生薬学 (後藤) 234    Date : 05-Feb-2016 15:34  
Instrument : MStation  
Sample : 14AS\_mm4  
Note : NBA  
Inlet : Direct    Ion Mode : FAB+  
RT : 2.35 min    Scan# : 22  
Elements : C 19/0, H 27/0, O 5/0  
Mass Tolerance : 1000ppm, 5mmu if m/z < 5, 50mmu if m/z > 50  
Unsaturation (U.S.) : -0.5 - 20.0

|   | Observed m/z  | Int%           |      |    |    |   |
|---|---------------|----------------|------|----|----|---|
|   | 335.1845      | 100.00         |      |    |    |   |
|   | Estimated m/z | Err[ppm / mmu] | U.S. | C  | H  | O |
| 1 | 335.1858      | -4.0 / -1.3    | 6.5  | 19 | 27 | 5 |

### Figure S44. HRFABMS data of 2.

Data : 分子生薬学 (後藤) 235    Date : 05-Feb-2016 15:40  
Instrument : MStation  
Sample : 14AS\_mm5  
Note : NBA  
Inlet : Direct    Ion Mode : FAB+  
RT : 2.46 min    Scan# : 23  
Elements : C 19/0, H 29/0, O 5/0  
Mass Tolerance : 1000ppm, 5mmu if m/z < 5, 50mmu if m/z > 50  
Unsaturation (U.S.) : -0.5 - 20.0

|   | Observed m/z  | Int%           |      |    |    |   |
|---|---------------|----------------|------|----|----|---|
|   | 337.2012      | 100.00         |      |    |    |   |
|   | Estimated m/z | Err[ppm / mmu] | U.S. | C  | H  | O |
| 1 | 337.2015      | -0.9 / -0.3    | 5.5  | 19 | 29 | 5 |

Figure S45. HRFABMS data of 3.

Data : 分子生薬学 (後藤) 237     Date : 05-Feb-2016 15:53  
Instrument : MStation  
Sample : 14AS\_mm9  
Note : NBA  
Inlet : Direct     Ion Mode : FAB+  
RT : 2.24 min     Scan# : 21  
Elements : C 19/0, H 27/0, O 5/0  
Mass Tolerance : 1000ppm, 5mmu if m/z < 5, 50mmu if m/z > 50  
Unsaturation (U.S.) : -0.5 - 20.0

| Observed m/z | Int%   | Estimated m/z | Err[ppm / mmu] | U.S. | C  | H  | O |
|--------------|--------|---------------|----------------|------|----|----|---|
| 335.1850     | 100.00 |               |                |      |    |    |   |
| 1 335.1858   |        |               | -2.5 / -0.8    | 6.5  | 19 | 27 | 5 |

Figure S46. HRFABMS data of 4.

Data : 分子生薬学 (後藤) 236     Date : 05-Feb-2016 15:47  
Instrument : MStation  
Sample : 14AS\_mm6  
Note : NBA  
Inlet : Direct     Ion Mode : FAB+  
RT : 2.02 min     Scan# : 19  
Elements : C 19/0, H 27/0, O 5/0  
Mass Tolerance : 1000ppm, 5mmu if m/z < 5, 50mmu if m/z > 50  
Unsaturation (U.S.) : -0.5 - 20.0

| Observed m/z | Int%   | Estimated m/z | Err[ppm / mmu] | U.S. | C  | H  | O |
|--------------|--------|---------------|----------------|------|----|----|---|
| 335.1828     | 100.00 |               |                |      |    |    |   |
| 1 335.1858   |        |               | -9.1 / -3.0    | 6.5  | 19 | 27 | 5 |

Figure S47. HRFABMS data of 5.

Data : 分子生薬学 (後藤) 238      Date : 05-Feb-2016 16:00  
Instrument : MStation  
Sample : 14AS\_mm3  
Note : NBA  
Inlet : Direct      Ion Mode : FAB+  
RT : 2.83 min      Scan# : 24  
Elements : C 16/0, H 21/0, O 5/0  
Mass Tolerance : 1000ppm, 5mmu if m/z < 5, 50mmu if m/z > 50  
Unsaturation (U.S.) : -0.5 - 20.0

|   | Observed m/z  | Int%           |      |    |    |   |
|---|---------------|----------------|------|----|----|---|
|   | 293.1392      | 100.00         |      |    |    |   |
|   | Estimated m/z | Err[ppm / mmu] | U.S. | C  | H  | O |
| 1 | 293.1389      | +1.0 / +0.3    | 6.5  | 16 | 21 | 5 |

Figure S48. HRFABMS data of 6.

Data : 分子生薬学 (後藤) 173      Date : 04-Jun-2015 13:27  
Instrument : MStation  
Sample : 15YK44C  
Note : NBA  
Inlet : Direct      Ion Mode : FAB+  
RT : 3.95 min      Scan# : 26  
Elements : C 11/0, H 38/0, O 5/0  
Mass Tolerance : 1000ppm, 5mmu if m/z < 5, 50mmu if m/z > 50  
Unsaturation (U.S.) : -0.5 - 10.0

|   | Observed m/z | Int%   | Err[ppm / mmu] | U.S. | Composition |
|---|--------------|--------|----------------|------|-------------|
| 1 | 225.0764     | 100.00 | +0.5 / +0.1    | 5.5  | C11 H13 O5  |



Figure S49. HRFABMS data of 7.

Data : 分子生薬学 (後藤) 233      Date : 05-Feb-2016 15:27  
Instrument : MStation  
Sample : 14AS\_mm2  
Note : NBA  
Inlet : Direct      Ion Mode : FAB+  
RT : 2.13 min      Scan# : 20  
Elements : C 19/0, H 27/0, O 5/0  
Mass Tolerance : 1000ppm, 5mmu if m/z < 5, 50mmu if m/z > 50  
Unsaturation (U.S.) : -0.5 - 20.0

|    | Observed m/z  | Int%           |      |    |    |   |
|----|---------------|----------------|------|----|----|---|
|    | 335.1845      | 100.00         |      |    |    |   |
|    | Estimated m/z | Err[ppm / mmu] | U.S. | C  | H  | O |
| 1. | 335.1858      | -4.0 / -1.3    | 6.5  | 19 | 27 | 5 |

Figure S50. HRFABMS data of 8.

Data : 分子生薬学 (後藤) 240      Date : 24-Feb-2016 13:59  
Instrument : MStation  
Sample : 14AS\_mm1  
Note : NBA  
Inlet : Direct      Ion Mode : FAB+  
RT : 2.35 min      Scan# : 22  
Elements : C 19/0, H 27/0, O 5/0  
Mass Tolerance : 1000ppm, 5mmu if m/z < 5, 50mmu if m/z > 50  
Unsaturation (U.S.) : -0.5 - 20.0

|   | Observed m/z  | Int%           |      |    |    |   |
|---|---------------|----------------|------|----|----|---|
|   | 335.1814      | 100.00         |      |    |    |   |
|   | Estimated m/z | Err[ppm / mmu] | U.S. | C  | H  | O |
| 1 | 335.1858      | -13.3 / -4.4   | 6.5  | 19 | 27 | 5 |

**Table 51. Optical Rotations of 1–4, 7 and 8**

*Acronyculatin I (1)*.  $[\alpha]_{\text{D}}^{21} -2.7$  (*c* 0.06, CH<sub>3</sub>OH)

*Acronyculatin J (2)*.  $[\alpha]_{\text{D}}^{21} +8.4$  (*c* 0.02, CH<sub>3</sub>OH).

*Acronyculatin K (3)*.  $[\alpha]_{\text{D}}^{21} +2.0$  (*c* 0.03, CH<sub>3</sub>OH).

*Acronyculatin L (4)*.  $[\alpha]_{\text{D}}^{21} -7.4$  (*c* 0.03, CH<sub>3</sub>OH).

*Acronyculatin O (7)*.  $[\alpha]_{\text{D}}^{21} +0.7$  (*c* 0.06, CH<sub>3</sub>OH).

*Acronyculatin B (8)*.  $[\alpha]_{\text{D}}^{21} +2.7$  (*c* 0.04, CH<sub>3</sub>OH).
